# Supplementary material
Source: PubMed Central journal article supplement (PMC4621997)
Supplement: ja5b07438_si_001.pdf [file ja5b07438_si_001.pdf]

# **A Highly Convergent Total Synthesis of Leustroducsin B**

*Barry M. Trost\**, *Berenger Biannic*, *Cheyenne S. Brindle*, *B. Michael O'Keefe*,  
*Thomas J. Hunter* and *Ming-Yu Ngai*

Supporting information

**Table of contents:**

|                                                                    |     |
|--------------------------------------------------------------------|-----|
| 1. Experimental part                                               | S3  |
| 1.1. General methods                                               | S3  |
| 1.2. Optimization of the synthesis of <b>26</b>                    | S4  |
| 1.3. Synthesis of western fragment <b>2</b>                        | S5  |
| 1.4. Synthesis of central fragment <b>3</b>                        | S8  |
| 1.5. Synthesis of eastern fragment <b>4</b>                        | S13 |
| 1.5.1. <i>Synthesis of (S)-6-methyloctanoic acid (22)</i>          | S13 |
| 1.5.2. <i>Completion of the synthesis of 4</i>                     | S15 |
| 1.6. Completion of the synthesis of Leustroducsin B ( <b>1</b> )   | S20 |
| 2. <sup>1</sup> H and <sup>13</sup> C NMR spectra of new compounds | S27 |

## 1. Experimental part

### 1.1. General methods

Air and/or moisture sensitive reactions were carried out under an argon atmosphere in oven-dried glassware and with anhydrous solvents. All compounds were purchased from commercial sources unless otherwise noted and used without further purification. Solvents were freshly distilled or dried by passing through an alumina column.

Thin layer chromatography was carried out on glass plates coated with silica gel SiO<sub>2</sub> 60 F254 from Merck; visualization with a UV lamp (254 nm) or by staining with a *p*-anisaldehyde or potassium permanganate solution. Flash chromatography was performed with silica gel SiO<sub>2</sub> 60 (0.040–0.063 μm, 230–400 mesh), technical solvents, and a head pressure of 0.2–0.4 bar. Melting points (m.p.) were measured on a Thomas Hoover capillary melting point apparatus in open capillaries and are uncorrected. Proton (<sup>1</sup>H) and carbon (<sup>13</sup>C) nuclear magnetic resonance (NMR) spectroscopy was performed on a Mercury NMR instrument at 400 MHz (<sup>1</sup>H) or 125 MHz (<sup>13</sup>C) and on a Unity NMR spectrometer at 500 MHz (<sup>1</sup>H) or 150 MHz (<sup>13</sup>C). Chemical shifts are reported in ppm relative to the residual protiated solvent (CDCl<sub>3</sub>: δH = 7.26 ppm, δC = 77.16 ppm). All <sup>13</sup>C NMR spectra are proton decoupled. The resonance multiplicity is described as s (singlet), d (doublet), t (triplet), q (quartet), m (multiplet), and br (broad). Infrared spectroscopic (IR) data were recorded on sodium chloride plates neat or as thin films on a Perkin-Elmer Paragon 500 FT-IR spectrometer. Absorption bands are reported in wavenumbers (cm<sup>-1</sup>) in the range of 4000–600 cm<sup>-1</sup>.

High-resolution mass spectrometry (HRMS) was measured on a Bruker micrOTOF-Q II electrospray ionization (ESI) mass spectrometer by the Vincent Coates Foundation Mass Spectrometry Laboratory at Stanford University. Mass peaks are reported in m/z units.



### 1.3. Synthesis of Western Fragment 2

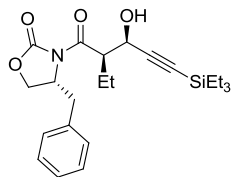

#### (R)-4-benzyl-3-((2R,3R)-2-ethyl-3-hydroxy-5-(triethylsilyl)pent-4-ynyl)oxazolidin-2-one (7).

Et<sub>3</sub>N (44.6 mmol, 6.00 mL) and Bu<sub>2</sub>BOTf (1M in CH<sub>2</sub>Cl<sub>2</sub>, 44.6 mmol, 44.6 mL) were successively added dropwise to **5** in CH<sub>2</sub>Cl<sub>2</sub> (190 mL) at 0°C. The reaction was stirred at the same temperature for 30 minutes, cooled to -78°C, aldehyde **6** in CH<sub>2</sub>Cl<sub>2</sub> (20 mL) was added dropwise over 1 hour (syringe pump) and stirred for an extra hour to afford a clear orange solution. At -78°C, 20 mL of buffer (pH = 7 solution, 20 mL), MeOH (20 mL), H<sub>2</sub>O<sub>2</sub> (30% aqueous solution, 20 mL) were added successively and the crude mixture stirred at room temperature for 2 hours. The organic fraction was recovered, dried over MgSO<sub>4</sub>, concentrated under vacuum and the crude material purified by flash chromatography (gradient 5-10-15 mol% EtOAc/petroleum ether) to afford **7** as a thick colorless oil (87 %, 13.391g); R<sub>f</sub> = 0.20 (10% EtOAc/ hexanes); [α]<sub>D</sub> = + 20.2 (c 1.00, CH<sub>2</sub>Cl<sub>2</sub>); IR (neat) 3430, 2916, 2835, 1759, 1674, 1367, 1331, 1192, 1092, 1004, 724, 693 cm<sup>-1</sup>; <sup>1</sup>H NMR (500 MHz, CDCl<sub>3</sub>): δ = 7.35-7.21 (5H), 4.73-4.64 (m, 2H), 4.19-4.11 (m, 3H), 3.33 (dd, J = 16.5, 4.0 Hz, 1H), 2.72 (dd, J = 16.5, 12.5 Hz, 1H), 2.61 (d, J = 7.5 Hz, 1H), 1.98-1.92 (m, 2H), 1.03 (t, J = 7.6 Hz, 3H), 0.96 (t, J = 8.0 Hz, 9H), 0.58 (q, J = 8.0 Hz, 6H); <sup>13</sup>C NMR (90 MHz, CDCl<sub>3</sub>): 174.0, 153.5, 135.4, 129.6, 129.2, 127.6, 105.4, 88.4, 66.3, 63.7, 55.7, 50.5, 38.2, 22.1, 11.7, 7.6, 4.5, 4.4; HRMS (ESI) Calcd for C<sub>23</sub>H<sub>33</sub>NNaO<sub>4</sub>Si (M+Na)<sup>+</sup>: 438.2071; found 438.2066.

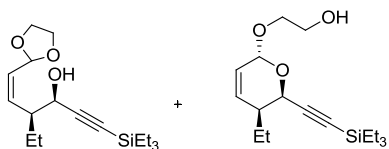

#### Alcohols **10** and **11**.

DiBAL-H (1.2 M in toluene, 67.5 mmol, 81 mL) was added dropwise at -78°C to a solution of alcohol **7** (29.1 mmol, 12.1 g) in dry THF (500 mL). The reaction mixture was stirred at the same temperature for 2 hours, diluted with dry diethylether (300 mL) and Rochelle salt (saturated aqueous solution, 150 mL) was added. The crude mixture was stirred at room temperature for 2 hours, the organic fraction collected, dried over MgSO<sub>4</sub> and concentrated under vacuum at 0°C to recover a solution of aldehyde **8** in toluene (about 80 mL).

To the solution obtained above was added successively CH<sub>2</sub>Cl<sub>2</sub> (300 mL), **9** (43.7 mmol, 18.73 g), tris[2-(2-methoxyethoxy)ethyl]amine TDA (58.3 mmol, 18.84 mL) and K<sub>2</sub>CO<sub>3</sub> (aqueous saturated solution, 400 mL). The dark red reaction mixture was vigorously stirred at room temperature for 16 hours (pale red emulsion), diluted with diethyl ether (300 mL), the organic fraction recovered, rinsed with H<sub>2</sub>O (2 x 100 mL), dried over MgSO<sub>4</sub>, concentrated under vacuum and the crude material was purified by flash chromatography (gradient 10-20 mol% EtOAc/petroleum ether) to afford **10** and **11** as thick colorless oils (56 % combined yield, 5.11 g). For **10**, about 10% of *E*-isomer was observed by <sup>1</sup>H NMR.

**10**: R<sub>f</sub> = 0.30 (20% EtOAc/ hexanes); [α]<sub>D</sub><sup>22</sup> = + 11.9 (c 1.00, CH<sub>2</sub>Cl<sub>2</sub>); IR (neat) 3481, 2915, 2835, 1438, 1128, 1101, 1030, 993, 716 cm<sup>-1</sup>; <sup>1</sup>H NMR (500 MHz, CDCl<sub>3</sub>): δ = 5.88 (d, J = 10.5 Hz, 1H), 5.74 (d, J = 10.5 Hz, 1H), 5.06 (s, 1H), 4.66 (d, J = 5.5 Hz, 1H), 3.91-3.73 (m, 4H), 2.95 (t, J = 6.3 Hz, 1H), 2.30-2.25 (m, 1H), 1.71-1.50 (m, 2H), 1.01-0.96 (m, 12H), 0.60 (q, J = 7.5 Hz, 6H); <sup>13</sup>C NMR (90 MHz, CDCl<sub>3</sub>): 132.1, 125.5, 104.5, 96.0, 88.8, 70.9, 64.2, 62.4, 39.1, 24.3, 11.5, 7.60, 4.5; HRMS (ESI) Calcd for C<sub>17</sub>H<sub>30</sub>NaO<sub>3</sub>Si (M+Na)<sup>+</sup>: 333.1856; found 333.1865.

**11**: R<sub>f</sub> = 0.15 (20% EtOAc/ hexanes); [α]<sub>D</sub><sup>22</sup> = + 5.31 (c 1.00, CH<sub>2</sub>Cl<sub>2</sub>); IR (neat) 33.85, 2915, 2871, 2835, 1439, 1096, 1064, 1029, 991, 717 cm<sup>-1</sup>; <sup>1</sup>H NMR (500 MHz, CDCl<sub>3</sub>): δ = 6.08 (dd, J = 10.5, 1.0 Hz, 1H), 5.75 (d, J = 10.5 Hz, 1H), 5.04 (s, 1H), 4.83 (d, J = 4.0 Hz, 1H), 3.90-3.71 (m, 4H), 2.56 (bs, 1H), 2.07-1.53 (m, 3H), 1.02-0.97 (m, 12H), 0.62 (q, J = 7.5 Hz, 6H); <sup>13</sup>C NMR (90 MHz, CDCl<sub>3</sub>): 133.0, 124.8, 103.7, 95.6, 89.3, 70.9, 63.1, 62.6, 39.0, 22.8, 11.6, 7.6, 4.5; HRMS (ESI) Calcd for C<sub>17</sub>H<sub>30</sub>NaO<sub>3</sub>Si (M+Na)<sup>+</sup>: 333.1856; found 333.1859.

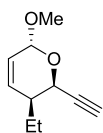

**(2R,3S,6R)-3-ethyl-2-ethynyl-6-methoxy-3,6-dihydro-2H-pyran (11a).**<sup>1</sup>

To a solution of **10** and **11** combined (11.4 mmol, 3.54 g) in dry methanol (50 mL) was added TsOH·H<sub>2</sub>O (3 mol%, 0.34 mmol, 65.0 mg) in one portion. The reaction mixture was stirred for one hour at room temperature to form a light pink solution. K<sub>2</sub>CO<sub>3</sub> (22.8 mol, 3.15 g) was added in one portion at room temperature and the reaction was stirred at the same temperature for 16 hours, diluted with dry diethyl ether (100 mL) and rinsed with H<sub>2</sub>O (2 x 100 mL). The organic fraction was recovered, dried over MgSO<sub>4</sub>, concentrated under vacuum (no heating) and the crude material purified by flash chromatography (gradient 0-5 mol% EtOAc/petroleum ether) to afford **11a** as a colorless oil (88 %, 1.665 g); R<sub>f</sub> = 0.57 (10% ethyl acetate/petroleum ether); [α]<sub>D</sub><sup>22</sup> = 148.7 ± 0.1 (CH<sub>2</sub>Cl<sub>2</sub>, c = 2.23); IR (neat) 3295, 3045, 2963, 2935, 2879, 2828, 1657, 1464, 1402, 1382, 1336, 1187, 1110, 1071, 1046, 1023, 965, 906, 850, 792, 740 cm<sup>-1</sup>; <sup>1</sup>H NMR (500 MHz, CDCl<sub>3</sub>) δ 6.07 (dd, J = 5.5, 10.3 Hz, 1H), 5.71 (ddd, J = 1.1, 2.6, 10.1 Hz, 1H),

4.86 (d,  $J = 2.3$  Hz, 1H), 4.78 (t,  $J = 2.9$  Hz, 1H), 3.44 (s, 3H), 2.48 (d,  $J = 2.3$  Hz, 1H), 1.98 (sextet,  $J = 4.3$  Hz, 1H), 1.88 (ddq,  $J = 4.4, 13.4, 7.6$  Hz, 1H), 1.54 (ddq,  $J = 9.3, 13.3, 7.4$  Hz, 1H), 0.96 (t,  $J = 7.4$  Hz, 3H).  $^{13}\text{C}$  NMR (126 MHz,  $\text{CDCl}_3$ );  $\delta$  132.4, 124.7, 95.8, 81.2, 74.4, 61.8, 55.6, 38.6, 22.4, 11.3. HRMS Calcd for  $\text{C}_9\text{H}_{11}\text{O}$  ( $\text{M}-\text{OCH}_3$ ) $^+$  = 135.0810, found 135.0819.

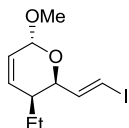

**(2R,3S,6R,E)-3-ethyl-2-(2-iodovinyl)-6-methoxy-3,6-dihydro-2H-pyran (2).**

Schwartz reagent ( $\text{Cp}_2\text{ZrHCl}$ ) (816.3 mg, 3.16 mmol) was suspended in dry  $\text{CH}_2\text{Cl}_2$  (10 mL). Terminal alkyne **S1** (350.9 mg, 2.11 mmol) in dry  $\text{CH}_2\text{Cl}_2$  (5 mL) was then added slowly at ambient temperature. The reaction was stirred for 15 min and iodine (885.5 mg, 3.5 mmol) in dry  $\text{CH}_2\text{Cl}_2$  (5 mL) was added dropwise until the solution turn light brown.  $\text{Na}_2\text{S}_2\text{O}_3$  (saturated aqueous solution, 30 mL) was immediately added followed by  $\text{H}_2\text{O}$  (10 mL) under vigorous stirring. The organic fraction was recovered, rinsed with  $\text{H}_2\text{O}$  (10 mL), dried over  $\text{MgSO}_4$ , concentrated under vacuum (no heating) and the crude material purified by flash chromatography (gradient 0-5 mol% EtOAc/petroleum ether) to afford **2** as a pale yellow oil (78 %, 485.6 mg);  $[\alpha]_D^{25} = 134.5 \pm 0.4$  ( $\text{CH}_2\text{Cl}_2$ ,  $c = 1.23$ ).  $R_f$  (5% ethyl acetate/petroleum ether) = 0.39. IR (thin film) = 3043, 2962, 2932, 2876, 2825, 1652, 1614, 1464, 1398, 1337, 1278, 1188, 1111, 1051  $\text{cm}^{-1}$ .  $^1\text{H}$  NMR (400 MHz,  $\text{CDCl}_3$ )  $\delta$  6.57 (dd,  $J = 4.9, 14.5$  Hz, 1H), 6.38 (dd,  $J = 1.5, 14.3$  Hz, 1H), 6.09 (dd,  $J = 5.8, 10.2$  Hz, 1H), 5.72 (ddd,  $J = 1.1, 2.7, 10.2$  Hz, 1H), 4.84 (d,  $J = 2.3$  Hz, 1H), 4.46 (m, 1H), 3.38 (s, 3H), 1.90 (sextet,  $J = 4.4$  Hz, 1H), 1.50 (dq,  $J = 4.7, 7.6$  Hz, 1H), 1.34 (dq,  $J = 9.3, 7.3$  Hz, 1H), 0.89 (t,  $J = 7.5$  Hz, 3H);  $^{13}\text{C}$  NMR (100 MHz,  $\text{CDCl}_3$ )  $\delta$  144.3, 133.1, 124.9, 95.8, 76.8, 72.0, 55.3, 38.8, 21.7, 11.5; HRMS (EI) Calcd for  $\text{C}_9\text{H}_{12}\text{IO}$  ( $\text{M}-\text{OCH}_3$ ) = 262.9933, found 262.9938.

### 1.4. Synthesis of Central Fragment 3

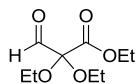

#### Ethyl 2,2-diethoxy-3-oxopropanoate (**13**).

Diisopropylamine (25.8 mL, 183.3 mmol) was dissolved in THF (200 mL) and cooled to 0 °C. *n*-BuLi (2.4 M hexanes, 70.9 mL, 170 mmol) was added slowly and the reaction mixture was stirred for 15 min before it was cooled to -78 °C. Ethyldiethoxyacetate (**12**) (25 g, 141 mmol) was added dropwise over 5 min and the reaction was stirred for 15 min at the same temperature. Methyl formate (26 mL, 423 mmol) was added dropwise and the reaction warmed up to room temperature over 1 h. Hydrochloric acid (1N aqueous) was added dropwise to the solution under vigorous stirring until pH = 4 was reached. Et<sub>2</sub>O (300 mL) and H<sub>2</sub>O (100 mL) were added, the layers were separated and the aqueous layer was extracted twice with diethyl ether (2 x 100 mL). The combined organic layers were dried (MgSO<sub>4</sub>), concentrated *in vacuo* and chromatographed gradiently with 10-30% EtOAc/petroleum ether to give aldehyde **13** (12.98 g, 45% yield) as a colorless oil. The spectral data were in accord with literature precedent.<sup>2</sup> R<sub>f</sub> (20% ethyl acetate/petroleum ether) = 0.22. <sup>1</sup>H NMR (300 MHz, CDCl<sub>3</sub>) δ 9.52 (s, 1H), 4.27 (q, *J* = 7.2 Hz, 2H), 3.63 (m, 4H), 1.30 (t, *J* = 7.2 Hz, 3H), 1.29 (t, *J* = 6.9 Hz, 6H). <sup>13</sup>C NMR (126 MHz, CDCl<sub>3</sub>) δ 195.2, 165.3, 130.3, 99.5, 62.4, 59.8, 15.1, 14.1.

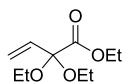

#### Ethyl 2,2-diethoxybut-3-enoate (**13a**).

To a suspension of Ph<sub>3</sub>PCH<sub>3</sub>Br (24.5 g, 68.51 mmol) in THF (300 mL) was added *t*-BuONa (5.80 g, 60.4 mmol). The yellow mixture was stirred for 1 h at room temperature, and then aldehyde **13** (8.21 g, 40.3 mmol) was added. The reaction was stirred for 10 min and petroleum ether (300 mL) was added. The reaction mixture was then filtered, concentrated under vacuum, and triturated with petroleum ether (300 mL). The filtrate was recovered, concentrated under vacuum and the crude material purified by column chromatography gradiently with 10-20% ethyl acetate/petroleum ether to give the title compound **13a** (5.92 g, 73% yield). R<sub>f</sub> (10% ethyl acetate/petroleum ether) = 0.30. IR (thin film) 2980, 2934, 2897, 1750, 1447, 1394, 1260, 1186, 1120, 1056 cm<sup>-1</sup>. <sup>1</sup>H NMR (300 MHz, CDCl<sub>3</sub>); δ 5.81 (dd, *J* = 10.5, 17.4 Hz, 1H), 5.66 (dd, *J* = 1.8, 17.4 Hz, 1H), 5.42 (dd, *J* = 1.8, 10.2 Hz, 1H), 4.24 (q, *J* = 6.9 Hz, 2H), 3.58 (m, 2H), 3.46 (m, 2H), 1.29 (t, *J* = 7.5 Hz, 3H), 1.25 (t, *J* = 7.2 Hz, 6H). <sup>13</sup>C NMR (75 MHz, CDCl<sub>3</sub>); δ 168.9,



134.8, 120.0, 99.8, 61.7, 58.4, 15.1, 14.1. HRMS (EI) Calcd for C<sub>8</sub>H<sub>18</sub>O<sub>3</sub> (M-OEt) = 157.0865, found: 157.0860.

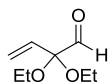

#### 2,2-diethoxybut-3-enal (**14**).

To a solution of ester **13a** (5.92 g, 29.3mmol) in DCM (120 mL) at -78 °C was added DIBAL-H (1.2M in toluene, 61.0 mL, 73.3 mmol). The reaction was allowed to stir for 1.5 h when acetone (3 mL) was added to quench the reaction. The solution was allowed to warm to ambient temperature, diluted with diethyl ether (200 mL) and then sodium potassium tartrate (aqueous saturated solution, 200 mL) was added. The mixture was stirred vigorously until the layers quickly separated upon cessation of stirring. The layers were separated and the aqueous layer was extracted with diethyl ether (2 x 100 mL). The combined organic layers were washed with brine, and dried (MgSO<sub>4</sub>). The crude mixture was concentrated under vacuum to give the title aldehyde **14** in solution in toluene (approximately 50 mL) and was used directly in the next step. <sup>1</sup>H NMR analysis showed a conversion higher than 95%. IR (neat) 2980, 1749, 1407, 1179, 1056, 997 cm<sup>-1</sup>. <sup>1</sup>H NMR (400 MHz, CDCl<sub>3</sub>); δ 9.28 (s, 1H), 5.67 (m, 2H), 5.55 (m, 1H), 3.60 (m, 2H), 3.51 (m, 2H), 1.26 (t, *J* = 6.8 Hz, 6H). <sup>13</sup>C NMR (100 MHz, CDCl<sub>3</sub>); δ 196.5, 132.7, 123.0, 102.1, 58.5, 15.5. HRMS (EI) Calcd for C<sub>6</sub>H<sub>9</sub>O<sub>2</sub> (M-OEt) = 113.0603, found 113.0603.

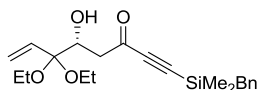

#### (**R**)-1-(benzyltrimethylsilyl)-6,6-diethoxy-5-hydroxyoct-7-en-1-yn-3-one (**16**)

To a solution of (*S,S*)-Prophenol ligand (119 mg, 0.19 mmol) in THF (5 mL) at 0 °C was added diethylzinc (0.97 M toluene, 0.39 mL, 0.38 mmol) and the reaction was stirred for 30 min before addition to the substrates. To 4 Å molecular sieves (746 mg) was added a mixture of 2,2-diethoxybut-3-enal **14** (1.18 g, 7.46 mmol) and 4-(benzyltrimethylsilyl)but-3-yn-2-one **15**<sup>3</sup> (1.94 g, 8.95 mmol) in THF (25 mL). The catalyst solution prepared above was then added. After 20 h at ambient temperature, pH 7 buffer and diethyl ether were added. The layers were separated, and the aqueous layer was extracted twice with ether. The combined organic layers were combined, washed with brine, dried (MgSO<sub>4</sub>), concentrated *in vacuo*, and chromatographed gradiently with 10-20% diethyl ether/petroleum ether to give the title compound **16** (2.12 g, 76% yield). Chiral HPLC: OD column, 254 nm, 1.0 mL/min, 98:2 heptane: isopropanol, *t<sub>r</sub>* (minor) = 8.8 min, *t<sub>r</sub>* (major) = 9.7 min. 99% ee. [ $\alpha$ ]<sub>D</sub><sup>25</sup> = -7.5 ± 0.1 (CH<sub>2</sub>Cl<sub>2</sub>, *c* = 1.8). *R<sub>f</sub>* (10% ethyl acetate/petroleum ether) = 0.24. IR (thin film) 3567, 2976, 2897, 2151, 1996, 1684, 1601,

1559, 1494, 1456, 1410, 1253, 1208, 1074, 1055  $\text{cm}^{-1}$ .  $^1\text{H}$  NMR (500 MHz,  $\text{CDCl}_3$ )  $\delta$  7.25 (m, 2H), 7.12 (m, 1H), 7.07 (m, 2H), 5.75 (dd,  $J = 11.0, 17.5$  Hz, 1H), 5.56 (dd,  $J = 2.0, 17.5$  Hz, 1H), 5.43 (dd,  $J = 2.0, 10.5$  Hz, 1H), 4.41 (dt,  $J = 9.5, 2.5$  Hz, 1H), 3.49-3.58 (m, 3H), 3.41 (m, 1H), 2.74 (ddd,  $J = 1.0, 2.5, 16.5$  Hz, 1H), 2.61 (dd,  $J = 9.5, 17.0$  Hz, 1H), 2.38 (dd,  $J = 1.5, 3.0$  Hz, 1H), 2.26 (s, 2H), 1.20 (t,  $J = 7.0$  Hz, 3H), 1.17 (t,  $J = 7.0$  Hz, 3H), 0.2 (s, 3H), 0.2 (s, 3H).  $^{13}\text{C}$  NMR (126 MHz,  $\text{CDCl}_3$ )  $\delta$  185.6, 137.9, 134.0, 128.4, 128.4, 124.8, 124.8, 120.2, 103.1, 100.8, 96.7, 69.1, 57.2, 56.9, 47.3, 25.4, 15.4, 15.4, -2.7, -2.7. Anal. Calcd for  $\text{C}_{21}\text{H}_{30}\text{O}_4\text{Si}$ : C, 67.34; H, 8.07. Found: C, 67.49; H, 7.87.

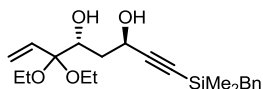

**(3R,5R)-1-(benzyl dimethylsilyl)-6,6-diethoxyoct-7-en-1-yne-3,5-diol (16a).**

To a solution of ynone **16** (1.20 g, 3.2 mmol) in isopropanol (degassed for 15 min with Argon, 35 mL) at ambient temperature was added (*R,R*)-Noyori's catalyst (38 mg, 0.064 mmol). The reaction was stirred for 12 h and then the solvent was removed under vacuum. The residue was chromatographed gradually with 10-15% ethyl acetate/petroleum ether to give the title compound **16a** (1.1 g, 91% yield) in greater than 20:1 dr.  $[\alpha]_{\text{D}}^{25} = -3.9 \pm 01$  ( $\text{CH}_2\text{Cl}_2$ ,  $c = 1.0$ ).  $R_f$  (20% ethyl acetate/petroleum ether) = 0.31. IR (thin film) 3446, 3026, 2975, 2932, 2897, 2172, 1601, 1494, 1453, 1411, 1251, 1208, 1158, 1056, 986  $\text{cm}^{-1}$ ;  $^1\text{H}$  NMR (500 MHz,  $\text{CDCl}_3$ );  $\delta$  7.23 (t,  $J = 7.7$  Hz, 2H), 7.10 (t,  $J = 7.4$  Hz, 1H), 7.07 (d,  $J = 7.2$  Hz, 2H), 5.75 (dd,  $J = 10.9, 17.5$  Hz, 1H), 5.53 (dd,  $J = 2.1, 17.6$  Hz, 1H), 5.40 (dd,  $J = 2.0, 10.9$  Hz, 1H), 4.61 (dt,  $J = 7.9, 4.8$  Hz, 1H), 4.31 (ddd,  $J = 1.5, 5.4, 8.7$  Hz, 1H), 3.50 (m, 3H), 3.43 (m, 1H), 3.37 (d,  $J = 7.9$  Hz, 1H), 2.56 (s, 1H), 2.20 (m, 2H), 1.79 (m, 2H), 1.20 (t,  $J = 7.1$  Hz, 3H), 1.16 (t,  $J = 7.0$  Hz, 3H), 0.13 (s, 3H), 0.12 (s, 3H);  $^{13}\text{C}$  NMR (126 MHz,  $\text{CDCl}_3$ );  $\delta$  138.7, 132.9, 128.3, 128.2, 124.4, 121.6, 110.4, 105.9, 89.5, 77.1, 66.6, 49.5, 40.7, 26.0, -2.3, -2.3; Anal. Calcd for  $\text{C}_{21}\text{H}_{32}\text{O}_4\text{Si}$ : C, 66.98; H, 8.57. Found: C, 66.79; H, 8.38.

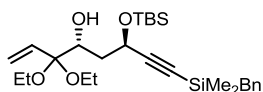

**(4R,6R)-8-(benzyl dimethylsilyl)-6-((tert-butyl dimethylsilyl)oxy)-3,3-diethoxyoct-1-en-7-yn-4-ol (17).**

To diol **16a** (1.07 g, 2.84 mmol) in dimethylformamide (DMF) (15 mL) at ambient temperature was added imidazole (251 mg, 3.69 mmol) and TBSCl (449 mg, 2.98 mmol). The reaction was allowed to stir for 12 h. The mixture was then diluted with diethyl ether and washed with water. The aqueous layer was extracted twice with diethyl ether. The combined organic layers were washed with brine, dried ( $\text{MgSO}_4$ ), concentrated *in vacuo* and chromatographed gradually with 5-15% ethyl acetate/petroleum ether to give

the TBS ether **17** (1.20 g, 88% yield).  $[\alpha]_D^{25} = 51.6 \pm 0.2$  ( $\text{CH}_2\text{Cl}_2$ ,  $c = 1.0$ ).  $R_f$  (10% ethyl acetate/petroleum ether) = 0.63. IR (thin film) 3586, 3504, 3027, 2931, 2894, 2858, 2174, 1938, 1879, 1602, 1495, 1472, 1454, 1411, 1362, 1346, 1290, 1251, 1207, 1157  $\text{cm}^{-1}$ .  $^1\text{H NMR}$  (400 MHz,  $\text{CDCl}_3$ );  $\delta$  7.21 (t,  $J = 7.4$  Hz, 2H), 7.08 (t,  $J = 7.2$  Hz, 1H), 7.06 (d,  $J = 8.1$  Hz, 2H), 5.78 (dd,  $J = 10.9, 17.5$  Hz, 1H), 5.53 (dd,  $J = 2.2, 17.6$  Hz, 1H), 5.39 (dd,  $J = 2.2, 11.0$  Hz, 1H), 4.61 (dd,  $J = 2.9, 9.0$  Hz, 1H), 4.09 (d,  $J = 10.5$  Hz, 1H), 3.43-3.58 (m, 4H), 2.52 (s, 1H), 2.18 (s, 2H), 1.88 (dd,  $J = 9.0, 14.4$  Hz, 1H), 1.60 (ddd,  $J = 2.9, 10.6, 14.3$  Hz, 1H), 1.19 (t,  $J = 7.1$  Hz, 3H), 1.17 (t,  $J = 7.1$  Hz, 3H), 0.90 (s, 9H), 0.13 (s, 3H), 0.12 (s, 3H), 0.10 (s, 3H), 0.09 (s, 3H).  $^1\text{H NMR}$  (400 MHz,  $d_6$ -benzene);  $\delta$  7.16 (m, 3H), 7.04 (m, 2H), 5.78 (dd,  $J = 10.8, 17.6$  Hz, 1H), 5.62 (dd,  $J = 2.4, 17.6$  Hz, 1H), 5.21 (dd,  $J = 2.4, 10.8$  Hz, 1H), 4.97 (dd,  $J = 2.0, 10.4$  Hz, 1H), 4.29 (dt,  $J = 10.8, 2.0$  Hz, 1H), 3.36-3.56 (m, 4H), 2.30 (ddt,  $J = 10.8, 14.4, 2.0$  Hz, 1H), 2.21 (t,  $J = 2.2$  Hz, 1H), 2.12 (s, 2H), 1.98 (ddd,  $J = 2.4, 10.8, 13.2$  Hz, 1H), 1.05 (t,  $J = 7.2$  Hz, 3H), 1.04 (s, 9H), 1.01 (t,  $J = 6.8$  Hz, 3H), 0.29 (s, 3H), 0.22 (s, 3H), 0.09 (s, 6H).  $^{13}\text{C NMR}$  (100 MHz,  $d_6$ -benzene);  $\delta$  139.1, 134.9, 128.7, 128.5, 124.7, 119.4, 110.1, 101.6, 87.1, 69.5, 60.4, 57.2, 56.5, 40.6, 26.3, 26.0, 18.4, 15.5, 15.4, -2.2, -2.2, -4.3, -4.9. Anal. Calcd for  $\text{C}_{27}\text{H}_{46}\text{O}_4\text{Si}_2$ : C, 66.07; H, 9.45. Found: C, 66.21; H, 9.42.

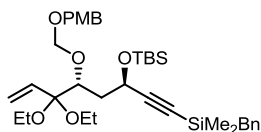

**(5R,7R)-7-((benzyltrimethylsilyl)ethynyl)-5-(1,1-diethoxyallyl)-1-(4-methoxyphenyl)-9,9,10,10-tetramethyl-2,4,8-trioxa-9-silaundecane (19).**

To 1-((chloromethoxy)methyl)-4-methoxybenzene ( $\text{PMBOCH}_2\text{Cl}$ ) **18**<sup>4</sup> (2.16 g, 11.6 mmol) was added diisopropylethylamine (3 mL, 17.3 mmol), followed by alcohol **17** (1.42 g, 2.9 mmol) in DMF (8 mL). TBAI (107 mg, 0.29 mmol) was then added and the reaction was heated at 40 °C for 20 h. Diethyl ether (20 mL) and water (20 mL) were added and the layers were separated. The aqueous layer was extracted 3 times with diethyl ether. The combined organic layers were washed with brine, dried ( $\text{MgSO}_4$ ), concentrated *in vacuo*, and chromatographed isocratically with 5% ethyl acetate/petroleum ether to give the title compound **19** (1.77 g, 97% yield).  $[\alpha]_D^{25} = 48.8 \pm 0.1$  ( $\text{CH}_2\text{Cl}_2$ ,  $c = 1.3$ ).  $R_f$  (10% ethyl acetate/petroleum ether) = 0.64. IR (thin film) 2931, 2895, 2858, 2172, 2067, 1996, 1940, 1879, 1662, 1614, 1587, 1514, 1494, 1464, 1411, 1389, 1361, 1303, 1250, 1208, 1160  $\text{cm}^{-1}$ .  $^1\text{H NMR}$  (500 MHz,  $\text{CDCl}_3$ );  $\delta$  7.28 (d,  $J = 8.5$  Hz, 2H), 7.21 (t,  $J = 7.6$  Hz, 2H), 7.08 (t,  $J = 7.3$  Hz, 1H), 7.06 (d,  $J = 7.0$  Hz, 2H), 6.87 (d,  $J = 8.5$  Hz, 2H), 5.81 (dd,  $J = 10.9, 17.5$  Hz, 1H), 5.53 (dd,  $J = 2.3, 17.6$  Hz, 1H), 5.38 (dd,  $J = 2.2, 10.9$  Hz, 1H), 4.91 (d,  $J = 6.3$  Hz, 1H), 4.84 (d,  $J = 6.3$  Hz, 1H), 4.63 (d,  $J = 11.6$  Hz, 1H), 4.55 (d,  $J = 11.6$  Hz, 1H), 4.55 (m, 1H), 3.93 (dd,  $J = 1.5, 9.9$  Hz, 1H), 3.80 (s, 3H), 3.38-3.56 (m, 4H), 2.19 (s,

2H), 1.95 (ddd,  $J = 1.5, 10.5, 14.6$  Hz, 1H), 1.62 (ddd,  $J = 2.4, 10.0, 14.6$  Hz, 1H), 1.17 (t,  $J = 7.1$  Hz, 3H), 1.13 (t,  $J = 7.1$  Hz, 3H), 0.87 (s, 9H), 0.11 (s, 3H), 0.10 (s, 3H), 0.10 (s, 3H), 0.07 (s, 3H).  $^{13}\text{C}$  NMR (75 MHz,  $\text{CDCl}_3$ );  $\delta$  159.7, 139.0, 135.4, 130.6, 129.7, 128.5, 124.8, 119.0, 114.0, 110.1, 102.2, 96.1, 87.5, 77.6, 69.8, 60.6, 57.3, 55.9, 54.7, 41.6, 26.2, 26.1, 18.4, 15.5, 15.4, -2.2, -2.2, -4.0, -4.7. HRMS (EI) Calcd for  $\text{C}_{36}\text{H}_{56}\text{O}_6\text{NaSi}_2 = 663.3513$ , found 663.3518.

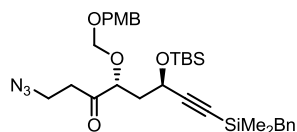

**(4R,6R)-1-azido-8-(benzyltrimethylsilyloxy)-6-((tert-butyltrimethylsilyloxy)oxy)-4-(((4-methoxybenzyl)oxy)methoxy)oct-7-yn-3-one (3).**

Ketal **19** (5.38 g, 8.39 mmol) was dissolved in acetone (42 mL) and aqueous acetic acid (80% AcOH/water, 42 mL). The mixture was stirred for 6 h at ambient temperature and then  $\text{NaN}_3$  (1.64 g, 25.2 mmol) was added. The mixture was stirred for 2 h. The reaction was then diluted with diethyl ether and washed with water. Solid  $\text{NaHCO}_3$  was added to neutralize the acetic acid. The layers were separated and the aqueous layer was extracted twice with diethyl ether. The combined organic layers were washed with brine, dried ( $\text{MgSO}_4$ ), concentrated *in vacuo* and chromatographed gradiently with 6-7% ethyl acetate/petroleum ether to give the title compound **3** (4.6735 g, 91% yield).  $[\alpha]_D^{25} = 12.2 \pm 0.1$  ( $\text{CH}_2\text{Cl}_2$ ,  $c = 1.1$ ).  $R_f$  (10% ethyl acetate/petroleum ether) = 0.40. IR (thin film) 2957, 2895, 2858, 2101, 1723, 1614, 1515, 1494, 1464, 1408, 1362, 1302, 1250, 1166, 1092, 1036  $\text{cm}^{-1}$ .  $^1\text{H}$  NMR (400 MHz,  $\text{CDCl}_3$ )  $\delta$  7.22 (m, 4H), 7.07 (m, 3H), 6.89 (m, 2H), 4.77 (d,  $J = 6.8$  Hz, 1H), 4.68 (d,  $J = 6.8$  Hz, 1H), 4.57 (d,  $J = 11.6$  Hz, 1H), 4.54 (dd,  $J = 3.6, 9.2$  Hz, 1H), 4.46 (dd,  $J = 3.6, 8.8$  Hz, 1H), 3.80 (s, 3H), 3.49 (m, 2H), 2.78 (m, 2H), 2.18 (s, 2H), 1.96 (m, 2H), 0.90 (s, 9H), 0.14 (s, 3H), 0.11 (s, 3H), 0.11 (s, 3H), 0.09 (s, 3H).  $^{13}\text{C}$  NMR (75 MHz,  $\text{CDCl}_3$ )  $\delta$  208.1, 159.4, 138.8, 129.6, 129.3, 128.4, 128.3, 124.5, 113.9, 107.8, 95.2, 88.4, 79.9, 70.1, 59.3, 55.3, 45.6, 40.8, 37.9, 26.0, 25.9, 18.2, -2.2, -2.3, -4.1, -4.8. HRMS (EI) Calcd for  $\text{C}_{32}\text{H}_{47}\text{N}_3\text{O}_5\text{Si}_2 = 609.3054$ , found 609.3040.

## 1.5. Synthesis of Eastern 4.

### 1.5.1. Synthesis of (*S*)-6-methyloctanoic acid (**22**).

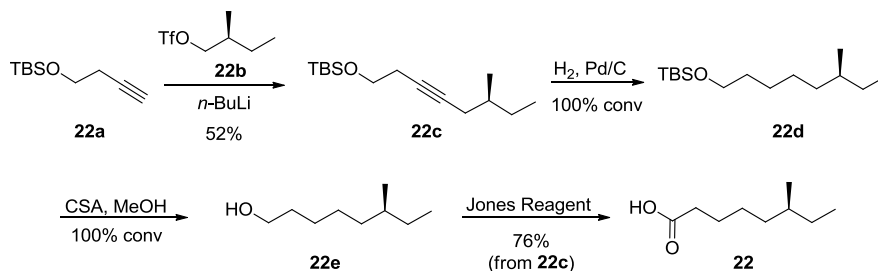

Scheme S1. Synthesis of **22**.

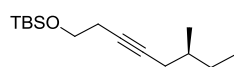

#### (*S*)-tert-butyltrimethyl(6-methyloct-3-ynoxy)silane (**22c**)

Triflate **22b** was synthesized according to literature precedent.<sup>5</sup> (*S*)-(-)-2-Methyl-1-butanol (3 mL, 28 mmol) was dissolved in DCM (100 mL) and cooled to -78 °C. Pyridine (2.7 mL, 33 mmol) was then added followed by syringe pump addition of triflic anhydride (4.8 mL, 28.5 mmol) over 30 min. The reaction was stirred for 2 h and then quenched with brine, diluted with diethyl ether, washed with water, twice with aqueous CuSO<sub>4</sub>, and brine. The organic layer was then dried (MgSO<sub>4</sub>), filtered, and concentrated *in vacuo* to give the desired triflate **22b** (3.85 g, 62% mass balance), which was stored at -15 °C and then used in the following reaction without further purification. The spectral data were in accord with literature values.<sup>24</sup> <sup>1</sup>H NMR (200 MHz, CDCl<sub>3</sub>); δ 4.37 (m, 2H), 1.87 (m, 1H), 1.50 (m, 1H), 1.30 (m, 1H), 1.02 (d, *J* = 6.8 Hz, 3H), 0.95 (t, *J* = 7.4 Hz, 3H).

Alkyne **22a** (3.66 mL, 17.7 mmol) was dissolved in THF (100 mL) and cooled to -78 °C. *n*-BuLi (1.6 M hexanes, 11 mL, 17.6 mmol) was added, followed by 1,3-dimethyl-3,4,5,6-tetrahydro-2(1*H*)-pyrimidinone (DMPU) (4.3 mL, 35.7 mmol). The reaction was stirred for 2 h while slowly warming to -30 °C. Triflate **22b** (3.72 g, 16.9 mmol) was then added as a solution in THF (40 mL) via cannula. The reaction was stirred for 4 h while slowly warming to ambient temperature. The reaction was then diluted with diethyl ether, washed with saturated aqueous NaHCO<sub>3</sub> and brine, dried (MgSO<sub>4</sub>), concentrated *in vacuo*, and triturated with 10% ethyl acetate/petroleum ether to remove polymerized THF. The solution was then concentrated *in vacuo* and chromatographed isocratically with 1% ethyl acetate/petroleum ether to give the title compound **22c** (2.69 g, 52% yield). [ $\alpha$ ]<sub>D</sub><sup>24</sup> = 4.2 ± 0.1 (CH<sub>2</sub>Cl<sub>2</sub>, *c* = 2.3). R<sub>f</sub> (2% ethyl acetate/ petroleum ether) = 0.30. IR (thin film) 2960, 2930, 2738, 1472, 1463, 1380, 1362, 1256, 1220,

1106, 1058, 1006  $\text{cm}^{-1}$ .  $^1\text{H}$  NMR (300 MHz,  $\text{CDCl}_3$ );  $\delta$  3.67 (t,  $J = 7.2$  Hz, 2H), 2.35 (tt,  $J = 2.7, 7.5$  Hz, 2H), 2.10 (ddt,  $J = 5.4, 16.2, 2.4$  Hz, 1H), 1.99 (ddt,  $J = 6.6, 16.2, 2.1$  Hz, 1H), 1.45 (m, 2H), 1.18 (m, 1H), 0.92 (d,  $J = 6.6$  Hz, 3H), 0.88 (s, 9H), 0.85 (t,  $J = 7.2$  Hz, 3H), 0.05 (s, 6H).  $^{13}\text{C}$  NMR (75 MHz,  $\text{CDCl}_3$ );  $\delta$  79.9, 77.4, 62.2, 34.2, 28.4, 25.7, 25.6, 23.0, 18.8, 18.1, 11.3, -5.5. HRMS (ESI) Calcd for  $\text{C}_{11}\text{H}_{21}\text{OSi}$  (M-*t*-Bu) = 197.1362, found 197.1369.

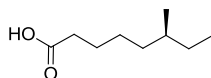

**(S)-6-methyloctanoic acid (22).**

Alkyne **22c** (2.69 g, 8.71 mmol) was dissolved in ethyl acetate (80 mL) and added to 10% Pd/C (514 mg, 0.48 mmol) via cannula. The reaction vessel was evacuated and then filled with hydrogen from a balloon. The reaction was stirred for 14 h and then the hydrogen was bubbled through the reaction mixture for 30 min. The reaction mixture was then filtered through a pad of celite, rinsed with diethyl ether and concentrated *in vacuo* to give the desired alkane **22d**, which was used without further purification in the next step.  $[\alpha]_{\text{D}}^{24} = 2.5 \pm 0.2$  ( $\text{CHCl}_3$ ,  $c = 1.5$ ).  $R_f$  (2% ethyl acetate/petroleum ether) = 0.18. IR (thin film) 2931, 2858, 1464, 1388, 1362, 1256, 1220, 1103, 1006  $\text{cm}^{-1}$ .  $^1\text{H}$  NMR (500 MHz,  $\text{CDCl}_3$ );  $\delta$  3.60 (t,  $J = 6.5$  Hz, 2H), 1.51 (m, 2H), 1.30 (m, 7H), 1.10 (m, 2H), 0.89 (s, 9H), 0.85 (t,  $J = 7.2$  Hz, 3H), 0.84 (d,  $J = 6.5$  Hz, 3H), 0.05 (s, 6H).  $^{13}\text{C}$  NMR (75 MHz,  $\text{CDCl}_3$ );  $\delta$  63.6, 36.9, 34.6, 33.2, 29.7, 27.2, 26.4, 26.2, 19.5, 18.6, 11.7, -5.0. HRMS (ESI) Calcd for  $\text{C}_{11}\text{H}_{25}\text{OSi}$  (M-*t*-Bu) = 201.1675, found 201.1690.

Silyl ether **22d** (8.71 mmol) was dissolved in DCM (40 mL) and methanol (40 mL). CSA (214 mg, 0.92 mmol) was then added and the reaction was stirred at ambient temperature for 2 h and then quenched with aqueous  $\text{NaHCO}_3$ . The reaction was diluted with diethyl ether and the layers separated. The aqueous layer was extracted with diethyl ether and DCM. The combined organic layers were washed with brine, dried ( $\text{MgSO}_4$ ) and concentrated *in vacuo* to give the known<sup>55</sup> desired free alcohol **22e** (1.32 g), which was used without further purification in the next reaction.  $^1\text{H}$  NMR (300 MHz,  $\text{CDCl}_3$ );  $\delta$  3.64 (t,  $J = 6.6$  Hz, 2H), 1.56 (m, 2H), 1.08-1.42 (m, 9H), 0.85 (m, 6H).

Primary alcohol **22e** (1.32 g) was dissolved in acetone (50 mL). Jones' reagent was added dropwise at ambient temperature until the color remained orange. Isopropanol was then added to quench the excess Jones' reagent. The reaction was diluted with diethyl ether, filtered to remove the blue solids, washed with aqueous  $\text{NaHSO}_4$  and brine. The aqueous layers were extracted twice with ether. The combined organic layers were dried ( $\text{MgSO}_4$ ), concentrated *in vacuo* and chromatographed with 10-15% ethyl

acetate/petroleum ether to give the title compound **22** (1.044g, 76% yield over 3 steps). The spectral data were in accord with literature values.<sup>6</sup>  $[\alpha]_D^{24} = 4.6 \pm 0.2$  (CHCl<sub>3</sub>, c = 1.41). IR (thin film) 2927, 1713, 1463, 1413, 1379, 1287, 1113, 938, 836, 773, 733 cm<sup>-1</sup>. <sup>1</sup>H NMR (300 MHz, CDCl<sub>3</sub>);  $\delta$  2.36 (t, *J* = 7.2 Hz, 2H), 1.63 (m, 2H), 1.33 (m, 5H), 1.13 (m, 2H), 0.86 (m, 6H). <sup>13</sup>C NMR (75 MHz, CDCl<sub>3</sub>);  $\delta$  179.2, 35.8, 33.9, 33.7, 29.1, 26.2, 24.7, 18.8, 11.0.

### 1.5.2. Completion of the synthesis of **4**.

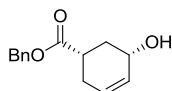

#### (±)-benzyl 5-hydroxycyclohex-3-enecarboxylate (**20a**).

Benzyl alcohol (784 mg, 7.25 mmol) was dissolved in THF (10 mL) then *t*-BuOK (7 mg, 0.061 mmol) was added. The solution was cooled to 0 °C and lactone **20**<sup>7</sup> (300 mg, 2.42 mmol) was added as a solution in THF (5 mL). The reaction was stirred for 30 min and then aqueous NH<sub>4</sub>Cl was added. The layers were separated and the aqueous layer was extracted 3 times with diethyl ether. The combined organic layers were washed with brine, dried (MgSO<sub>4</sub>), filtered, concentrated *in vacuo*, and chromatographed gradiently with 15-25% ethyl acetate/petroleum ether to give the title alcohol **20a** (403 mg, 72% yield). The spectral data were in accord with literature values.<sup>8</sup> *R*<sub>f</sub> (20% ethyl acetate/petroleum ether) = 0.23. IR (thin film) 3406, 3032, 2929, 1728, 1499, 1454, 1390, 1243, 1169, 1116, 1046, 1000 cm<sup>-1</sup>. <sup>1</sup>H NMR (300 MHz, CDCl<sub>3</sub>);  $\delta$  7.37 (m, 5H), 5.75 (m, 2H), 5.14 (s, 2H), 4.28 (m, 1H), 2.76 (m, 1H), 2.32 (m, 3H), 1.77 (ddd, *J* = 8.1, 10.8, 12.9 Hz, 1H). <sup>13</sup>C NMR (75 MHz, CDCl<sub>3</sub>);  $\delta$  175.0, 135.9, 130.9, 128.6, 128.3, 128.1, 126.9, 66.5, 66.1, 38.0, 34.2, 27.4.

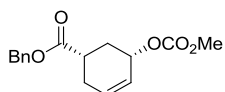

#### (±)-benzyl 5-(methoxycarbonyloxy)cyclohex-3-enecarboxylate (**21**).

Alcohol **20a** (321 mg, 1.38 mmol) and pyridine (0.56 mL, 6.92 mmol) were dissolved in DCM (8 mL). Methyl chloroformate (391 mg, 4.14 mmol) was then added at ambient temperature. The solution was stirred for 2 h and then aqueous NH<sub>4</sub>Cl was added. The layers were separated and the aqueous layer was extracted 3 times with DCM. The combined organic layers were washed with brine, dried (MgSO<sub>4</sub>), filtered, concentrated *in vacuo* and chromatographed gradiently with 8-10% ethyl acetate/petroleum ether to give the title compound **21** (668 mg, 97% yield). *R*<sub>f</sub> (8% ethyl acetate/petroleum ether) = 0.25. IR (thin film) 3037, 2926, 2852, 1744, 1678, 1665, 1587, 1499, 1443, 1392, 1333, 1264, 1122 cm<sup>-1</sup>. <sup>1</sup>H NMR (500

MHz, CDCl<sub>3</sub>);  $\delta$  7.47 (m, 5H), 5.89 (ddt,  $J = 1.5, 3.5, 10.0$  Hz, 1H), 5.71 (dddd,  $J = 1.0, 2.5, 4.5, 10.0$  Hz, 1H), 5.26 (m, 1H), 5.15 (d,  $J = 12.0$  Hz, 1H), 5.12 (d,  $J = 12.5$  Hz, 1H), 3.76 (s, 3H), 2.78 (dddd,  $J = 3.0, 7.0, 10.5, 12.0$  Hz, 1H), 2.45 (dddd,  $J = 1.0, 2.5, 6.0, 11.5$  Hz, 1H), 2.34 (m, 2H), 1.86 (dt,  $J = 9.5, 12.5$  Hz, 1H). <sup>13</sup>C NMR (125 MHz, CDCl<sub>3</sub>);  $\delta$  173.8, 155.4, 135.9, 129.7, 128.6, 128.3, 128.2, 126.2, 73.0, 66.6, 54.8, 37.8, 30.4, 27.2. HRMS (ESI) Calcd for C<sub>16</sub>H<sub>18</sub>O<sub>5</sub> (M<sup>+</sup>) = 290.1154, found 290.1157.

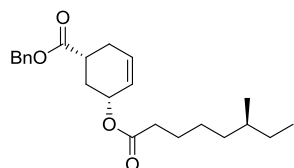

**(1R,5R)-benzyl 5-((S)-6-methyloctanoyloxy)cyclohex-3-enecarboxylate (23).**

(S)-6-Methyloctanoic acid **22** from above (445 mg, 2.8 mmol) was added to a mixture of NaH (60% in mineral oil, 96 mg) and THAB (1.043 g, 2.4 mmol) in DCM (10 mL). A solution obtained by mixing allylpalladium dimer (11 mg, 0.03 mmol) and (*S,S*)-standard Trost ligand (62 mg, 0.09 mmol) in CH<sub>2</sub>Cl<sub>2</sub> (2 mL) was added to the above mixture. After 15 min methyl carbonate **21** (348 mg, 1.2 mmol) was added and the reaction was stirred for 1.5 h. Silica gel was added to the reaction and the volatile organics were removed *in vacuo*. The silica gel was loaded for isocratic chromatography with 10% ethyl acetate/petroleum ether to give the title compound **23** (416 mg, 93% yield). HPLC: 99:1 heptane:isopropanol, 1.0 mL/min, 254 nm, OD column,  $t_R$  (minor) = 12.6 min,  $t_R$  (major) = 14.3 min.  $[\alpha]_D^{24} = 28.0 \pm 0.2$  (CH<sub>2</sub>Cl<sub>2</sub>,  $c = 1.05$ ).  $R_f$  (5% ethyl acetate/petroleum ether) = 0.25. IR (thin film) 3036, 2859, 2873, 1792, 1656, 1610, 1588, 1498, 1456, 1379, 1269, 1160, 1119, 1070 cm<sup>-1</sup>. <sup>1</sup>H NMR (500 MHz, CDCl<sub>3</sub>);  $\delta$  7.35 (m, 5H), 5.86 (ddd,  $J = 1.8, 3.8, 7.3, 9.6$  Hz, 1H), 5.63 (m, 1H), 5.41 (m, 1H), 5.15 (d,  $J = 12.5$  Hz, 1H), 5.11 (d,  $J = 12.3$  Hz, 1H), 2.78 (dddd,  $J = 2.8, 7.9, 8.3, 15.4$  Hz, 1H), 2.39 (ddd,  $J = 2.4, 5.2, 12.2$  Hz, 1H), 2.33 (m, 2H), 2.28 (t,  $J = 7.6$  Hz, 2H), 1.76 (dt,  $J = 9.4, 12.3$  Hz, 1H), 1.58 (m, 2H), 1.30 (m, 4H), 1.10 (m, 2H), 0.85 (t,  $J = 7.2$  Hz, 3H), 0.83 (d,  $J = 6.2$  Hz, 3H). <sup>13</sup>C NMR (75 MHz, CDCl<sub>3</sub>);  $\delta$  174.1, 173.5, 135.9, 129.1, 128.7, 128.3, 128.1, 127.0, 69.0, 66.5, 38.1, 36.2, 34.6, 34.2, 30.5, 29.5, 27.3, 26.3, 25.4, 19.2, 11.4. HRMS (ESI) Calcd for C<sub>23</sub>H<sub>32</sub>O<sub>4</sub>Na (M+Na) = 395.2198, found 395.2203.



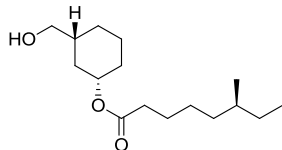

**(S)-((1S,3R)-3-(hydroxymethyl)cyclohexyl) 6-methyloctanoate (24)**

Benzyl ester **23** (975.7 mg, 2.62 mmol) in ethyl acetate (26 mL) was added to 10% Pd/C (282.5 mg, 0.028 mmol). Hydrogen gas was bubbled through this suspension for 50 min, then continued stirring under an atmosphere of hydrogen without bubbling for 14 h. The reaction was filtered through Celite, rinsed with ethyl acetate and concentrated *in vacuo* to give the desired saturated compound (735.7 mg, 99% mass balance), which was used without further purification.  $[\alpha]_D^{23} = -19.0 \pm 0.2$  (CH<sub>2</sub>Cl<sub>2</sub>, c = 1.1). IR (thin film) 2933, 2864, 1732, 1709, 1454, 1417, 1172, 1029 cm<sup>-1</sup>. <sup>1</sup>H NMR (500 MHz, CDCl<sub>3</sub>); δ 4.74 (tt, *J* = 4, 10.5 Hz, 1H), 2.46 (tt, *J* = 3.5, 11.5 Hz, 1H), 2.27 (t, *J* = 7.5 Hz, 2H), 2.24 (m, 1H), 1.96 (m, 2H), 1.90 (m, 1H), 1.58 (m, 2H), 1.52 (q, *J* = 12 Hz, 1H), 1.23-1.42 (m, 8H), 1.11 (m, 2H), 0.85 (t, *J* = 7.5 Hz, 3H), 0.84 (d, *J* = 6 Hz, 3H). <sup>13</sup>C NMR (75 MHz, CDCl<sub>3</sub>); δ 180.4, 173.3, 71.5, 41.3, 36.2, 34.7, 34.3, 31.1, 29.5, 27.8, 26.6, 25.4, 23.1, 19.2, 11.5. HRMS (EI) Calcd for C<sub>16</sub>H<sub>28</sub>O<sub>4</sub> = 284.1988, found 284.1994. Anal. Calcd for C<sub>16</sub>H<sub>28</sub>O<sub>4</sub>: C, 67.57; H, 9.92. Found: C, 67.70; H, 9.77.

The above carboxylic acid (735.7 mg, 2.59 mmol) was dissolved in THF (21 mL) and cooled to 0 °C. Borane dimethyl sulfide complex (0.3 mL, 3.16 mmol) was added and the reaction was stirred for 2 h while slowly warming to ambient temperature. Methanol (2 mL) and aqueous NaHCO<sub>3</sub> (12 mL) were then added to quench the reaction. The layers were separated and the aqueous layer was extracted 5 times with DCM. The combined organic layers were dried (MgSO<sub>4</sub>), filtered, concentrated *in vacuo* and chromatographed gradiently with 15-25% ethyl acetate/petroleum ether to give the title compound **24** (671.6 mg, 95% yield over two steps).  $[\alpha]_D^{23} = -5.0 \pm 0.2$  (CH<sub>2</sub>Cl<sub>2</sub>, c = 1.5). IR (thin film) 3446, 2933, 2861, 1733, 1456, 1379, 1173, 1101, 1030 cm<sup>-1</sup>. <sup>1</sup>H NMR (500 MHz, CDCl<sub>3</sub>); δ 4.74 (tt, *J* = 4.5, 11 Hz, 1H), 3.50 (d, *J* = 6 Hz, 2H), 2.27 (t, *J* = 7.5 Hz, 2H), 2.03 (m, 1H), 1.98 (m, 1H), 1.84 (ddt, *J* = 7, 13.5, 3.5 Hz, 1H), 1.74 (m, 1H), 1.21-1.45 (m, 12H), 1.01-1.16 (m, 3H), 0.91 (m, 1H), 0.85 (t, *J* = 7.5 Hz, 3H), 0.83 (d, *J* = 6 Hz, 3H). <sup>13</sup>C NMR (126 MHz, CDCl<sub>3</sub>); δ 173.5, 72.7, 67.9, 39.2, 36.2, 34.9, 34.8, 34.2, 31.9, 29.5, 28.3, 26.6, 25.4, 23.5, 19.2, 11.4. LRMS (ESI) Calcd for C<sub>16</sub>H<sub>30</sub>NaO<sub>3</sub> (M+Na) = 293.2, found 293.2. HRMS (EI) Calc'd for C<sub>9</sub>H<sub>19</sub>O<sub>2</sub> ((S)-methyloctanoic acid+H) = 159.1385, found 159.1378; Calc'd for C<sub>7</sub>H<sub>13</sub>O<sub>2</sub> (M-(S)-methyloctanoic acid) = 129.0916, found 129.0911.

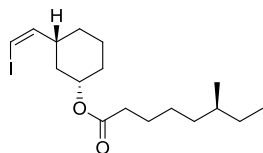

**(S)-((1S,3R)-3-((Z)-2-iodovinyl)cyclohexyl) 6-methyloctanoate (4)**

To a solution of the alcohol **24** (446.3 mg, 2 mmol) in DCM (20 mL) was added Dess-Martin periodinane (861 mg, 2 mmol) and NaHCO<sub>3</sub> (170.8 mg, 2 mmol). The reaction was stirred for 25 min and then diluted with diethyl ether and washed with aqueous NaHCO<sub>3</sub> and brine. The aqueous layer was extracted with ether and the combined organic layers were dried (MgSO<sub>4</sub>), filtered, concentrated *in vacuo* and chromatographed gradiently with 5-10% ethyl acetate/petroleum ether to give the desired aldehyde **24a** (374.9 mg, 85% yield) along with starting material (26.1 mg, 90% yield BRSM).  $[\alpha]_D^{23} = -19.3 \pm 0.3$  (CH<sub>2</sub>Cl<sub>2</sub>, c = 1.05). R<sub>f</sub> (10% ethyl acetate/petroleum ether) = 0.44. IR (thin film) 2927, 2856, 1732, 1463, 1379, 1171, 1108 cm<sup>-1</sup>. <sup>1</sup>H NMR (500 MHz, CDCl<sub>3</sub>); δ 9.64 (s, 1H), 4.80 (tt, *J* = 4, 10 Hz, 1H), 2.38 (dtt, *J* = 0.5, 3.5, 11 Hz, 1H), 2.28 (t, *J* = 7.5 Hz, 2H), 2.22 (m, 1H), 1.93 (m, 3H), 1.58 (m, 3H), 1.20-1.45 (m, 7H), 1.10 (m, 3H), 0.85 (t, *J* = 7 Hz, 3H), 0.83 (d, *J* = 6 Hz, 3H). <sup>13</sup>C NMR (126 MHz, CDCl<sub>3</sub>); δ 202.7, 173.3, 71.5, 48.5, 36.2, 34.7, 34.3, 31.2, 29.8, 29.5, 26.7, 25.4, 24.9, 22.5, 19.2, 11.5. LRMS (ESI) Calc'd for C<sub>32</sub>H<sub>57</sub>O<sub>6</sub> (2M+H) = 537.4, found 537.5. HRMS (EI) Calc'd for C<sub>9</sub>H<sub>19</sub>O<sub>2</sub> ((S)-methyloctanoic acid+H) = 159.1385, found 159.1385; Calc'd for C<sub>7</sub>H<sub>11</sub>O<sub>2</sub> (M-(S)-methyloctanoic acid) = 127.0759, found 127.0748.

Iodomethyltriphenylphosphonium iodide ([Ph<sub>3</sub>PCH<sub>2</sub>I]I) (89 mg, 0.168 mmol) was suspended in THF (0.5 mL). NaHMDS (2 M THF, 0.8 mL, 0.168 mmol) was then added and the reaction stirred for 5 min to give a bright yellow color. The solution was then cooled to -78 °C and the above aldehyde (15.0 mg, 0.056 mmol) was added slowly down the side of the flask as a solution in THF (0.5 mL) and DMPU (0.1 mL). The reaction was stirred for 10 min and then quenched with aqueous NH<sub>4</sub>Cl and warmed to ambient temperature. The layers were separated and the aqueous was extracted 3 times with diethyl ether. The combined organic layers were washed with brine, dried (MgSO<sub>4</sub>), filtered, concentrated *in vacuo* and chromatographed gradiently with 2-4% diethyl ether/petroleum ether to give the title compound **6.4** (14 mg, 64% yield) in >20:1 dr [as judged by comparison of the integration of the alkene protons at 6.46 ppm (minor diastereomer) and 5.98 ppm (major diastereomer) or the other alkene protons at 6.14 ppm (major diastereomer) and 6.03 ppm (minor diastereomer)].  $[\alpha]_D^{26} = 63.1 \pm 0.2$  (CH<sub>2</sub>Cl<sub>2</sub>, c = 1.1). IR (thin film) 2929, 2857, 1734, 1457, 1283, 1169 cm<sup>-1</sup>. <sup>1</sup>H NMR (500 MHz, CDCl<sub>3</sub>); δ 6.14 (dd, *J* = 0.8, 7.3 Hz, 1H), 5.98 (dd, *J* = 7.5, 8.5 Hz, 1H), 4.78 (tt, *J* = 4.3, 11.1 Hz, 1H), 2.46 (m, 1H), 2.27 (t, *J* = 7.5 Hz, 2H), 1.99 (m, 2H), 1.83 (d pentet, *J* = 13.7, 3.4 Hz, 1H), 1.70 (m, 1H), 1.58 (m, 3H), 1.44 (m, 1H), 1.18-1.36 (m,

5H), 1.00-1.16 (m, 4H), 0.85 (t,  $J = 7$  Hz, 3H), 0.83 (d,  $J = 6.5$  Hz, 3H).  $^{13}\text{C}$  NMR (126 MHz,  $\text{CDCl}_3$ );  $\delta$  173.3, 144.5, 80.8, 71.8, 42.3, 36.4, 36.3, 34.8, 34.3, 32.0, 31.4, 30.2, 29.5, 26.7, 25.5, 23.5, 22.8, 19.2, 11.5. HRMS (EI) Calc'd for  $\text{C}_{17}\text{H}_{29}\text{IO}_2 = 392.1212$ , found 392.1203.

## 1.6. Completion of the synthesis of Leustroducsin B (1)

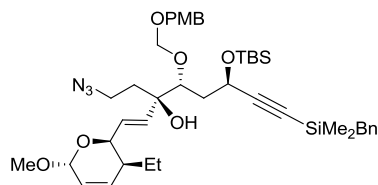

### **(3*R*,4*R*,6*R*,*E*)-4-((4-methoxybenzyloxy)methoxy)-3-(2-azidoethyl)-8-(benzyl dimethylsilyl)-6-(*tert*-butyl dimethylsilyloxy))-1-((2*S*,3*S*,6*R*)-3-ethyl-6-methoxy-3,6-dihydro-2*H*-pyran-2-yl)oct-1-en-7-yn-3-ol (26).**

Freshly prepared vinyl iodide **2** (308.3 mg, 1.05 mmol) was dissolved in THF (1.5 mL) and cooled to -78 °C. *n*-BuLi (2.2 M hexanes, 430  $\mu$ L, 0.94 mmol) and dimethylzinc (Acros new bottle of 1.2 M toluene, 780  $\mu$ L, 0.94 mmol) were then added and the reaction was stirred for 30 min. Ketone **3** (319.1 mg, 0.52 mmol) was then added as a solution in dry CH<sub>2</sub>Cl<sub>2</sub> (3.0 mL). The reaction was stirred for 9 h at -78 °C. The reaction was then poured over aqueous NaH<sub>2</sub>PO<sub>4</sub> and extracted with ethyl acetate. The organic layer was then washed with brine, dried (MgSO<sub>4</sub>), filtered, concentrated *in vacuo* and chromatographed isocratically with 10% ethyl acetate/petroleum ether to give the title compound **26** (306.4 mg, 75% yield) in >20:1 dr (as judged by <sup>1</sup>H NMR of the alkene proton at 6.12 ppm vs. 6.02 ppm for the diastereomer, or by comparison of the OH peak at 4.02 ppm vs. 3.99 ppm for the diastereomer, or by comparison of one of the protons adjacent to an OH group at 3.69 ppm vs. 3.77 ppm for the diastereomer).  $[\alpha]_D^{24} = 41.0 \pm 0.3$  (CH<sub>2</sub>Cl<sub>2</sub>, *c* = 1.11). *R*<sub>f</sub> (10% ethyl acetate/petroleum ether) = 0.25. IR (thin film) 3425, 2957, 2929, 2857, 2172, 2096, 1728, 1613, 1587, 1515, 1494, 1464, 1401, 1380, 1362, 1338, 1303, 1250, 1209, 1186, 1166, 1092, 1046, 965, 905, 838, 779, 764, 699 cm<sup>-1</sup>. <sup>1</sup>H NMR (500 MHz, CDCl<sub>3</sub>);  $\delta$  7.25 (d, *J* = 8.7 Hz, 2H), 7.20 (t, *J* = 7.6 Hz, 2H), 7.08 (t, *J* = 7.3 Hz, 1H), 7.03 (d, *J* = 7.4 Hz, 2H), 6.87 (d, *J* = 8.7 Hz, 2H), 6.13 (dd, *J* = 5.6, 10.1 Hz, 1H), 5.92 (dd, *J* = 4.6, 15.5 Hz, 1H), 5.74 (dd, *J* = 2.3, 9.9 Hz, 1H), 5.68 (d, *J* = 15.5 Hz, 1H), 4.87 (s, 1H), 4.86 (d, *J* = 7.0 Hz, 1H), 4.69 (d, *J* = 7.0 Hz, 1H), 4.66 (d, *J* = 11.4 Hz, 1H), 4.53 (d, *J* = 11.1 Hz, 1H), 4.44 (m, 1H), 4.04 (s, 1H), 3.79 (s, 3H), 3.49 (m, 1H), 3.37 (s, 3H), 3.28 (m, 1H), 2.16 (s, 2H), 1.96 (m, 2H), 1.89 (m, 2H), 1.78 (m, 1H), 1.72 (m, 1H), 1.48 (m, 1H), 1.32 (m, 2H), 0.88 (t, *J* = 7.4 Hz, 3H), 0.83 (s, 9H), 0.09 (s, 3H), 0.08 (s, 3H), 0.08 (s, 3H), 0.04 (s, 3H). <sup>13</sup>C NMR (126 MHz, CDCl<sub>3</sub>);  $\delta$  159.5, 138.7, 133.7, 130.6, 130.3, 129.7, 128.7, 128.3, 128.1, 125.0, 124.4, 113.9, 108.5, 96.8, 95.8, 87.8, 86.6, 74.9, 70.4, 69.5, 59.8, 55.2, 55.0, 47.2, 40.8, 39.0, 33.9, 25.9, 25.7, 21.6, 18.0, 11.4, -2.3, -2.4, -4.0, -4.8. LRMS (ESI) Calcd for C<sub>42</sub>H<sub>63</sub>N<sub>3</sub>NaO<sub>7</sub>Si<sub>2</sub> (M+Na)<sup>+</sup> = 800.41, found 800.41. HRMS (ESI) Calcd for C<sub>42</sub>H<sub>63</sub>N<sub>3</sub>NaO<sub>7</sub>Si<sub>2</sub> (M+Na)<sup>+</sup> = 800.4102, found 800.4124.

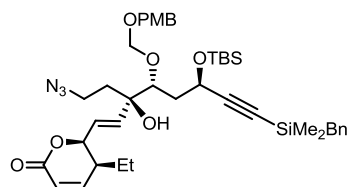

**(5S,6S)-6-((3R,4R,6R,E)-3-(2-azidoethyl)-8-(benzyltrimethylsilyl)-6-((tert-butyltrimethylsilyl)oxy)-3-hydroxy-4-(((4-methoxybenzyl)oxy)methoxy)oct-1-en-7-yn-1-yl)-5-ethyl-5,6-dihydro-2H-pyran-2-one (30).**

Acetal **26** (168.4 mg, 0.22 mmol) was dissolved in CH<sub>2</sub>Cl<sub>2</sub> (2.0 mL) and PCC (186.2 mg, 0.86 mmol) was added. MS 4Å (100 mg) was also added, the reaction stirred for 3 h and then directly applied to column chromatography, gradient 0-5% EtOAc/CH<sub>2</sub>Cl<sub>2</sub> to give the title compound **27** (104.3mg, 62%).  $[\alpha]_D^{25} = 55.2 \pm 0.1$  (CH<sub>2</sub>Cl<sub>2</sub>, c = 1.0). R<sub>f</sub> (20% ethyl acetate/petroleum ether = 0.18. IR (thin film) 3422, 2958, 2858, 2361, 2096, 1727, 1612, 1515, 1459, 1381, 1303, 1250, 1166, 1089, 1032 cm<sup>-1</sup>. <sup>1</sup>H NMR (500 MHz, CDCl<sub>3</sub>); δ 7.27 (d, *J* = 8.7 Hz, 2H), 7.22 (t, *J* = 7.6 Hz, 2H), 7.10 (t, *J* = 7.4 Hz, 1H), 7.06 (d, *J* = 6.8 Hz, 2H), 6.96 (dd, *J* = 5.4, 9.6 Hz, 1H), 6.90 (d, *J* = 8.7 Hz, 2H), 6.06 (d, *J* = 9.9 Hz, 1H), 5.97 (dd, *J* = 4.9, 15.4 Hz, 1H), 5.85 (d, *J* = 15.0 Hz, 1H), 5.02 (m, 1H), 4.88 (d, *J* = 6.8 Hz, 1H), 4.71 (d, *J* = 7.1 Hz, 1H), 4.68 (d, *J* = 11.1 Hz, 1H), 4.55 (d, *J* = 11.6 Hz, 1H), 4.46 (dd, *J* = 2.4, 10.3 Hz, 1H), 4.15 (br s, 1H), 3.81 (s, 3H), 3.49 (d, *J* = 7.2 Hz, 1H), 3.36 (ddd, *J* = 6.2, 9.8, 12.0 Hz, 1H), 3.27 (ddd, *J* = 5.6, 9.6, 12.6 Hz, 1H), 2.41 (m, 1H), 2.20 (s, 2H), 1.89-2.00 (m, 2H), 1.70-1.82 (m, 2H), 1.44 (m, 1H), 1.26 (m, 1H), 0.95 (t, *J* = 7.3 Hz, 1H), 0.85 (s, 9H), 0.12 (s, 3H), 0.11 (s, 6H), 0.07 (s, 3H). <sup>13</sup>C NMR (100 MHz, CDCl<sub>3</sub>); δ 164.1, 159.6, 150., 138.9, 134.2, 129.8, 128.8, 128.4, 128.3, 126.4, 124.5, 121.0, 114.1, 108.2, 96.8, 88.2, 86.2, 79.9, 75.1, 70.6, 60.0, 55.4, 47.2, 40.8, 39.3, 34.2, 26.1, 25.9, 21.7, 18.2, 11.1, -2.2, -2.3, -3.9, -4.7. LRMS (ESI) Calc'd for C<sub>41</sub>H<sub>59</sub>N<sub>3</sub>NaO<sub>7</sub>Si<sub>2</sub> (M+Na) = 784.4, found 784.4. HRMS (ESI) Calc'd for C<sub>41</sub>H<sub>59</sub>N<sub>3</sub>NaO<sub>7</sub>Si<sub>2</sub> = 784.3789, found 784.3785.

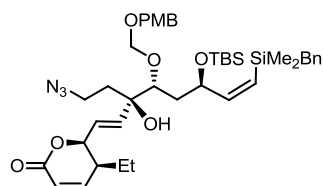

**(5S,6S)-6-((1E,3R,4R,6R,7Z)-3-(2-azidoethyl)-8-(benzyltrimethylsilyl)-6-((tert-butyltrimethylsilyl)oxy)-3-hydroxy-4-(((4-methoxybenzyl)oxy)methoxy)octa-1,7-dien-1-yl)-5-ethyl-5,6-dihydro-2H-pyran-2-one (32).**

Alkyne **30** (101.3 mg, 0.13 mmol) was dissolved in THF/*i*-PrOH (2.8 mL, 1:1), Et<sub>3</sub>N (23 μL, 0.17 mmol) and *o*-nitrobenzenesulfonylhydrazide **31**<sup>9</sup> (31.5 mg, 1.15 mmol) were added. The reaction was stirred at ambient temperature for 24 h **in the dark**, diluted with diethyl ether (5 mL) and washed with water (2 x 5

mL). The organic layer was washed with brine, dried (MgSO<sub>4</sub>), filtered, concentrated *in vacuo*, and chromatographed gradiently with 5-10-15% ethyl acetate/petroleum ether to give the title compound **32** (42.3 mg, 45% yield) and recovered starting material **30** (31.0 mg, 73% brsm).  $[\alpha]_D^{35} = 25.4 \pm 0.1$  (CH<sub>2</sub>Cl<sub>2</sub>, *c* = 1.3). R<sub>f</sub> (20% ethyl acetate/petroleum ether) = 0.25. IR (thin film) 3418, 2957, 2991, 2857, 2096, 1729, 1613, 1515, 1494, 1463, 1381, 1303, 1250, 1162, 1083, 1031 cm<sup>-1</sup>. <sup>1</sup>H NMR (500 MHz, CDCl<sub>3</sub>);  $\delta$  7.26 (d, *J* = 8.5 Hz, 2H), 7.22 (t, *J* = 7.6 Hz, 2H), 7.09 (t, *J* = 7.3 Hz, 1H), 7.01 (d, *J* = 7.6 Hz, 2H), 6.94 (dd, *J* = 5.4, 9.9 Hz, 1H), 6.89 (d, *J* = 8.7 Hz, 2H), 6.25 (dd, *J* = 8.7, 14.6 Hz, 1H), 6.05 (dd, *J* = 1.0, 9.9 Hz, 1H), 5.95 (dd, *J* = 4.9, 15.3 Hz, 1H), 5.77 (d, *J* = 15.4 Hz, 1H), 5.49 (d, *J* = 14.5 Hz, 1H), 4.99 (dt, *J* = 1.5, 4.0 Hz, 1H), 4.93 (d, *J* = 7.0 Hz, 1H), 4.72 (d, *J* = 11.7 Hz, 1H), 4.70 (d, *J* = 7.2 Hz, 1H), 4.53 (d, *J* = 11.4 Hz, 1H), 4.45 (d, *J* = 1.0 Hz, 1H), 4.37 (t, *J* = 9.2 Hz, 1H), 3.81 (s, 3H), 3.50 (d, *J* = 8.5 Hz, 1H), 3.34 (ddd, *J* = 5.7, 9.8, 12.5 Hz, 1H), 3.23 (ddd, *J* = 5.5, 9.9, 12.2 Hz, 1H), 2.40 (sextet, *J* = 4.8 Hz, 1H), 2.17 (s, 2H), 1.92 (ddd, *J* = 5.7, 9.6, 13.6 Hz, 1H), 1.67 (ddd, *J* = 5.6, 9.9, 13.8 Hz, 1H), 1.55-1.66 (m, 2H), 1.45 (ddd, *J* = 7.6, 9.3, 13.5 Hz, 1H), 1.31 (ddd, *J* = 1.7, 10.1, 13.7 Hz, 1H), 0.94 (t, *J* = 7.4 Hz, 3H), 0.82 (s, 9H), 0.13 (s, 6H), 0.00 (s, 3H), -0.03 (s, 3H). <sup>13</sup>C NMR (126 MHz, CDCl<sub>3</sub>);  $\delta$  164.1, 159.1, 152.5, 150.5, 139.7, 134.4, 129.9, 128.6, 128.3, 128.3, 126.6, 126.2, 124.3, 121.0, 114.1, 97.1, 87.8, 79.9, 74.9, 70.7, 70.1, 55.4, 47.2, 40.7, 39.3, 33.8, 26.6, 25.9, 21.7, 18.1, 11.1, -1.5, -1.7, -3.1, -4.4. LRMS (ESI) Calc'd for C<sub>41</sub>H<sub>61</sub>N<sub>3</sub>NaO<sub>7</sub>Si<sub>2</sub> (M+Na) = 786.4, found 786.4. HRMS (ESI) Calc'd for C<sub>41</sub>H<sub>61</sub>N<sub>3</sub>NaO<sub>7</sub>Si<sub>2</sub> (M+Na) = 786.3946, found 786.3940.

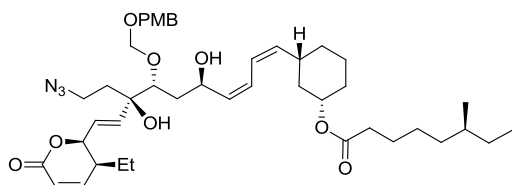

**(S)-((1S,3R)-3-((1Z,3Z,5R,7R,8R,9E)-7-((4-methoxybenzyloxy)methoxy)-8-(2-azidoethyl)-10-((2S,3S,6R)-3-ethyl-6-methoxy-3,6-dihydro-2H-pyran-2-yl)-5,8-dihydroxydeca-1,3,9-trienyl)cyclohexyl) 6-methyloctanoate (33).**

Vinyl silane **32** (3 mg, 0.004 mmol) and vinyl iodide **4** (4 mg, 0.010 mmol) in degassed THF (0.1 mL) were added to Pd<sub>2</sub>dba<sub>3</sub>·CHCl<sub>3</sub> (dba = dibenzylideneacetone) (0.9 mg, 0.0009 mmol) under argon. Acetic acid (1 μL, 0.017 mmol) was then added, followed by slow addition of TBAF (1M THF, 0.02 mL, 0.02 mmol) over 2 h at ambient temperature. The reaction was stirred for 14 h and then chromatographed gradiently from 0-50% ethyl acetate/petroleum ether to give the title compound **33** (2.1 mg, 70% yield).  $[\alpha]_D^{24} = 3.9 \pm 0.8$  (CH<sub>2</sub>Cl<sub>2</sub>, *c* = 0.42). <sup>1</sup>H NMR (500 MHz, CDCl<sub>3</sub>);  $\delta$  7.27 (d, *J* = 8.7 Hz, 2H), 6.89 (d, *J* = 8.7 Hz, 2H), 6.26 (t, *J* = 11.2 Hz, 1H), 6.15 (dd, *J* = 5.5, 9.9 Hz, 1H), 6.14 (t, *J* = 11.0 Hz, 1H), 5.90 (dd, *J*

= 4.3, 15.9 Hz, 1H), 5.76 (dd,  $J = 1.8, 10.5$  Hz, 1H), 5.72 (dd,  $J = 1.7, 15.4$  Hz, 1H), 5.44 (t,  $J = 10.1$  Hz, 1H), 5.31 (t,  $J = 10.0$  Hz, 1H), 4.88 (d,  $J = 1.8$  Hz, 1H), 4.87 (d,  $J = 6.6$  Hz, 1H), 4.80 (d,  $J = 6.8$  Hz, 1H), 4.70-4.80 (m, 2H), 4.63 (s, 2H), 4.56 (m, 1H), 3.81 (s, 3H), 3.67 (dd,  $J = 3.7, 9.6$  Hz, 1H), 3.43 (m, 1H), 3.38 (s, 3H), 3.33 (m, 1H), 2.57 (m, 1H), 2.46 (m, 1H), 2.34 (m, 1H), 2.27 (t,  $J = 7.3$  Hz, 2H), 1.88-2.00 (m, 4H), 1.80-1.85 (m, 2H), 1.75-1.80 (m, 1H), 1.70-1.75 (m, 1H), 1.66-1.69 (m, 1H), 1.00-1.66 (m, 13H), 0.91 (t,  $J = 7.6$  Hz, 3H), 0.85 (t,  $J = 7.1$  Hz, 3H), 0.83 (d,  $J = 6.3$  Hz, 3H).  $^{13}\text{C}$  NMR (126 MHz,  $d_6$ -benzene);  $\delta$  172.4, 160.3, 143.6, 136.3, 132.8, 129.8, 129.6, 127.3, 126.0, 124.2, 123.4, 115.8, 114.1, 96.8, 96.3, 88.9, 85.2, 71.7, 70.3, 69.6, 64.8, 54.7, 54.5, 48.1, 47.1, 38.7, 37.0, 34.6, 34.5, 34.4, 33.1, 31.5, 30.2, 30.0, 29.8, 26.3, 23.6, 22.8, 22.2, 19.1, 11.6, 11.0. HRMS (ESI) Calc'd for  $\text{C}_{44}\text{H}_{67}\text{N}_3\text{NaO}_9$  (M+Na) = 804.4775, found 804.4752.

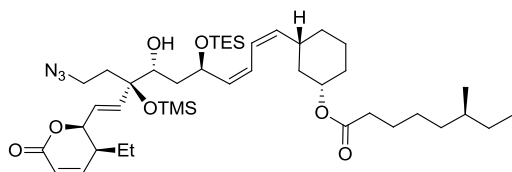

**(S)-((1S,3R)-3-((1Z,3Z,5R,7R,8R,9E)-8-(2-azidoethyl)-10-((2S,3S)-3-ethyl-6-oxo-3,6-dihydro-2H-pyran-2-yl)-7-hydroxy-5-(triethylsilyloxy)-8-(trimethylsilyloxy)deca-1,3,9-trienyl)cyclohexyl) 6-methyloctanoate (35).**

Diol **33** (41.2 mg, 0.053 mmol) was dissolved in DCM (1.0 mL) and cooled to  $-78$  °C. 2,6-Lutidine (92  $\mu\text{L}$ , 0.80 mmol) and TESOTf (18  $\mu\text{L}$ , 0.080 mmol) and the reaction was stirred for 1 h and then TMSOTf (96  $\mu\text{L}$ , 0.53 mmol) was added. The reaction was stirred for 1 h and then quenched with pH 7 phosphate buffer. The reaction was warmed to ambient temperature and extracted 5 times with diethyl ether, concentrated *in vacuo* to afford **34** as a light yellow gum which was used in the next step without further purification.  $[\alpha]_{\text{D}}^{25} = 38.2 \pm 0.9$  ( $\text{CH}_2\text{Cl}_2$ ,  $c = 0.41$ ).  $R_f$  (10% ethyl acetate/petroleum ether) = 0.15. IR (thin film) 2931, 2095, 1730, 1514, 1462, 1379, 1250, 1034, 841, 738  $\text{cm}^{-1}$ .  $^1\text{H}$  NMR (500 MHz,  $\text{CDCl}_3$ );  $\delta$  7.31 (d,  $J = 8.8$  Hz, 2H), 6.97 (dd,  $J = 5.4, 9.8$  Hz, 1H), 6.91 (d,  $J = 8.8$  Hz, 2H), 6.15 (t,  $J = 11.7$  Hz, 1H), 6.10 (m, 1H), 6.07 (dd,  $J = 1.1, 9.9$  Hz, 1H), 5.88 (dd,  $J = 1.1, 15.5$  Hz, 1H), 5.77 (dd,  $J = 6.0, 15.5$  Hz, 1H), 5.38 (t,  $J = 9.6$  Hz, 1H), 5.27 (t,  $J = 9.5$  Hz, 1H), 5.04 (t,  $J = 4.4$  Hz, 1H), 4.89 (d,  $J = 6.6$  Hz, 1H), 4.83 (d,  $J = 6.5$  Hz, 1H), 4.80 (m, 1H), 4.76 (m, 1H), 4.63 (s, 2H), 3.84 (s, 3H), 3.76 (d,  $J = 8.9$  Hz), 3.32 (m, 2H), 2.57 (m, 1H), 2.40 (m, 1H), 2.28 (t,  $J = 7.2$  Hz, 2H), 2.20 (ddd,  $J = 5.9, 11.4, 13.9$  Hz, 1H), 1.95-2.01 (m, 2H), 1.89-1.95 (m, 1H), 1.84 (dt,  $J = 13.3, 3.4$  Hz, 1H), 1.75 (dd,  $J = 10.6, 13.2$  Hz, 1H), 1.40-1.52 (m, 2H), 1.08-1.40 (m, 14H), 1.04 (m, 1H), 0.96 (t,  $J = 7.4$  Hz, 3H), 0.93 (t,  $J = 7.9$  Hz, 9H), 0.87 (t,  $J = 7.2$  Hz, 3H), 0.86 (d,  $J = 6.3$  Hz, 3H), 0.56 (q,  $J = 8.1$  Hz, 6H), 0.21 (s, 9H).  $^{13}\text{C}$  NMR (126 MHz,  $\text{CDCl}_3$ );  $\delta$  173.4, 164.0, 159.2, 149.9, 137.4, 135.5, 135.2, 129.8, 129.2, 125.3, 122.4, 122.0, 120.8,

113.8, 96.7, 82.3, 80.2, 79.2, 72.2, 70.0, 65.2, 55.3, 47.2, 39.8, 39.6, 38.1, 36.2, 36.1, 34.9, 34.7, 34.2, 31.9, 31.3, 29.7, 29.4, 26.6, 25.4, 23.7, 21.6, 19.1, 11.4, 11.1, 6.9, 5.2, 2.5. HRMS (ESI) Calc'd for C<sub>52</sub>H<sub>85</sub>N<sub>3</sub>NaO<sub>9</sub>Si<sub>2</sub> (M+Na) = 974.5722, found 974.5726.

PMBM ether **34** obtained above was dissolved in CH<sub>2</sub>Cl<sub>2</sub> (2.5 mL) and water (200 μL). DDQ (120.3 mg, 0.53 mmol) was then added and the reaction **vigorously** stirred for 1 h. **An emulsion must form in order for the reaction to proceed.** The reaction mixture was then quenched by addition of Na<sub>2</sub>S<sub>2</sub>O<sub>3</sub> (saturated aqueous solution, 2 mL) and NaHCO<sub>3</sub> (saturated aqueous solution, 2 mL) and the organic fraction rinsed multiple times with water. The crude material was chromatographed gradiently with 5-20% ethyl acetate/hexanes to give the title compound **35** (28.0 mg, 66% from **33**). [α]<sub>D</sub><sup>23</sup> = 42.9 ± 0.1 (CH<sub>2</sub>Cl<sub>2</sub>, c = 0.19). R<sub>f</sub> (10% ethyl acetate/petroleum ether) = 0.06. IR (thin film) 2955, 2919, 2875, 2851, 2095, 1767, 1728, 1462, 1380, 1253, 1081, 1017, 841, 738 cm<sup>-1</sup>. <sup>1</sup>H NMR (500 MHz, CDCl<sub>3</sub>); δ 6.98 (dd, *J* = 5.4, 9.9 Hz, 1H), 6.24 (t, *J* = 11.4 Hz, 1H), 6.09 (t, *J* = 10.3 Hz, 1H), 6.08 (dd, *J* = 1.2, 9.8 Hz, 1H), 5.94 (dd, *J* = 1.3, 15.7 Hz, 1H), 5.77 (dd, *J* = 5.9, 15.7 Hz, 1H), 5.57 (t, *J* = 9.8 Hz, 1H), 5.36 (t, *J* = 9.9 Hz, 1H), 5.05 (m, 1H), 4.96 (m, 1H), 4.77 (m, 1H), 3.86 (d, *J* = 10.0 Hz), 3.35 (m, 2H), 2.60 (m, 1H), 2.43 (m, 1H), 2.28 (t, *J* = 7.6 Hz, 2H), 2.10 (ddd, *J* = 6.5, 10.1, 14.0 Hz, 1H), 1.95-2.06 (m, 2H), 1.88-1.95 (m, 1H), 1.85 (m, 1H), 1.00-1.74 (m, 18H), 0.99 (t, *J* = 7.4 Hz, 3H), 0.96 (t, *J* = 8.1 Hz, 9H), 0.87 (t, *J* = 7.2 Hz, 3H), 0.86 (d, *J* = 6.3 Hz, 3H), 0.60 (q, *J* = 7.8 Hz, 6H), 0.15 (s, 9H). <sup>13</sup>C NMR (126 MHz, CDCl<sub>3</sub>); δ 173.3, 164.0, 150.0, 138.0, 135.3, 133.9, 125.5, 122.9, 121.6, 120.8, 80.2, 79.2, 73.6, 72.1, 67.5, 47.0, 39.5, 38.2, 38.1, 36.1, 35.3, 34.9, 34.7, 34.2, 31.9, 31.3, 29.7, 29.4, 26.6, 25.4, 23.7, 21.6, 19.1, 11.4, 11.1, 6.7, 4.7, 2.5. HRMS (ESI) Calc'd for C<sub>43</sub>H<sub>75</sub>N<sub>3</sub>NaO<sub>7</sub>Si<sub>2</sub> (M+Na) = 824.5041, found 824.5037.

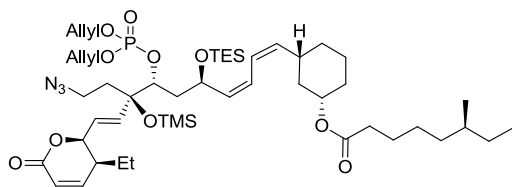

**(S)-((1S,3R)-3-((1Z,3Z,5R,7R,8R,9E)-8-(2-azidoethyl)-7-(bis(allyloxy)phosphoryloxy)-10-((2S,3S)-3-ethyl-6-oxo-3,6-dihydro-2H-pyran-2-yl)-5-(triethylsilyloxy)-8-(trimethylsilyloxy)deca-1,3,9-trienyl)cyclohexyl) 6-methyloctanoate (37).**

Secondary alcohol **35** (9.2 mg, 0.0115 mmol) and 1H-tetrazole (8.0 mg, 0.115 mmol) were dissolved in CH<sub>2</sub>Cl<sub>2</sub> (150 μL) and MeCN (150 μL). Diallyl diisopropylphosphoramidite (15.2 μL, 0.0575 mmol) was then added and the reaction was stirred for 1 h. The reaction was cooled to 0 °C and MeOH (20 μL) and *tert*-butylhydroperoxide (5.5 M decane, 20 μL) were then added. The reaction was stirred for 1 h and then quenched with NaSO<sub>3</sub>. The aqueous layer was extracted six times with diethyl ether and then



concentrated *in vacuo* and chromatographed gradiently with 10-40% ethyl acetate/hexanes to give the title phosphate **37** (5.5 mg, 50%).  $[\alpha]_D^{23} = 21.2 \pm 1.9$  (CH<sub>2</sub>Cl<sub>2</sub>, c = 0.08). R<sub>f</sub> (20% ethyl acetate/petroleum ether) = 0.31. IR (thin film) 3383, 2958, 2919, 2850, 2096, 1728, 1612, 1514, 1463, 1379, 1260, 1098, 1024, 801 cm<sup>-1</sup>. <sup>1</sup>H NMR (500 MHz, CDCl<sub>3</sub>); δ 6.98 (dd, *J* = 5.5, 9.8 Hz, 1H), 6.17 (m, 2H), 6.07 (dd, *J* = 1.1, 9.8 Hz, 1H), 5.98 (m, 2H), 5.88 (dd, *J* = 1.3, 15.6 Hz, 1H), 5.79 (dd, *J* = 5.6, 15.6 Hz, 1H), 5.43 (m, 1H), 5.39 (m, 1H), 5.37 (t, *J* = 9.3 Hz, 1H), 5.27-5.32 (m, 3H), 5.05 (brt, *J* = 4.3 Hz, 1H), 4.96 (t, *J* = 10.0 Hz, 1H), 4.76 (m, 1H), 4.40-4.50 (m, 5H), 3.40 (ddd, *J* = 5.4, 10.1, 17.3 Hz, 1H), 3.30 (ddd, *J* = 6.2, 10.3, 16.7 Hz, 1H), 2.58 (m, 1H), 2.42 (m, 1H), 2.28 (t, *J* = 6.8 Hz, 2H), 2.11 (m, 2H), 1.98 (m, 1H), 1.93 (m, 1H), 1.86 (m, 1H), 1.00-1.84 (m, 16H), 0.97 (t, *J* = 7.4 Hz, 3H), 0.96 (t, *J* = 8.1 Hz, 9H), 0.87 (t, *J* = 7.2 Hz, 3H), 0.86 (d, *J* = 6.5 Hz, 3H), 0.62 (q, *J* = 7.8 Hz, 6H), 0.23 (s, 9H). <sup>31</sup>P NMR (162 MHz, CDCl<sub>3</sub>); δ -0.6. <sup>13</sup>C NMR (150 MHz, CDCl<sub>3</sub>); δ 173.6, 159.7, 148.9, 139.3, 136.3, 135.6, 133.3, 132.7, 130.2, 127.4, 125.7, 79.7, 79.3, 71.6, 67.7, 67.5, 64.8, 46.1, 39.7, 39.6, 39.3, 39.0, 37.4, 37.4, 37.1, 34.5, 34.0, 31.1, 30.9, 26.6, 25.7, 24.3, 24.0, 22.8, 19.9, 10.8, 10.5, 6.2, 4.5, 1.7. HRMS (ESI) Calc'd for C<sub>49</sub>H<sub>84</sub>N<sub>3</sub>NaO<sub>10</sub>PSi<sub>2</sub> (M+Na) = 984.5331, found 984.5333.

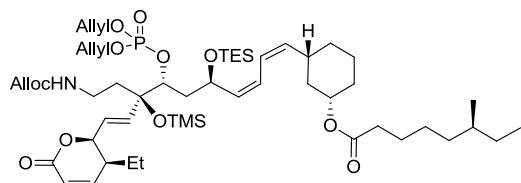

**(S)-(1S,3R)-3-((1Z,3Z,5R,7R,8R,9E)-8-(2-(((allyloxy)carbonyl)amino)ethyl)-7-((bis(allyloxy)phosphoryl)oxy)-10-((2S,3S)-3-ethyl-6-oxo-3,6-dihydro-2H-pyran-2-yl)-5-((triethylsilyl)oxy)-8-((trimethylsilyl)oxy)deca-1,3,9-trien-1-yl)cyclohexyl 6-methyloctanoate (38).**

To a solution of phosphonate **37** (4.2 mg, 0.0044 mmol) in THF/H<sub>2</sub>O (220 μL, 10:1) was added PPh<sub>3</sub> (3.4 mg, 0.013 mmol). The reaction mixture was stirred for 24 h at room temperature. Pyridine was added (3 μL, 0.022 mmol) and allyl chloroformate (2 μL, 0.013 mmol) was added in one portion under vigorous stirring. After 10 min, NaHCO<sub>3</sub> (saturated aqueous solution, 1mL) and EtOAc (2 mL) were added. The aqueous layer was extracted twice with ethyl acetate, concentrated *in vacuo* and purified by preparative silica gel chromatography 30% ethyl acetate/hexanes to give the title carbamate **38** (3.2 mg, 72%).  $[\alpha]_D^{23} = 74.5 \pm 0.4$  (CH<sub>2</sub>Cl<sub>2</sub>, c = 0.61). R<sub>f</sub> (20% ethyl acetate/petroleum ether) = 0.31. IR (thin film) 3322, 2886, 2835, 2812, 1704, 2201, 1441, 1360, 1235, 1150, 1069, 1006, 913, 831, 723 cm<sup>-1</sup>. <sup>1</sup>H NMR (500 MHz, CDCl<sub>3</sub>); δ 6.96 (dd, *J* = 5.5, 9.8 Hz, 1H), 6.14 (m, 2H), 6.04 (d, *J* = 9.8 Hz, 1H), 5.98-5.87 (m, 3H), 5.78 (dd, *J* = 5.5, 15.5 Hz, 1H), 5.39-5.17 (m, 6H), 5.06 (t, *J* = 4.0 Hz, 1H), 5.02 (t, *J* = 4.5 Hz, 1H), 4.90 (t, *J* = 9.5 Hz, 1H), 4.75-4.71 (m, 1H), 4.62 (t, *J* = 9.0 Hz, 1H), 4.56-4.53 (m, 6H), 3.28-3.21 (m, 2H), 2.58-2.52

(m, 2H), 2.41-2.36 (m, 2H), 2.25 (t,  $J = 7.5$  Hz, 2H), 2.04-1.80 (m, 3H), 1.84-1.00 (m, 16H), 0.97 (t,  $J = 7.4$  Hz, 3H), 0.96 (t,  $J = 8.1$  Hz, 9H), 0.87 (t,  $J = 7.2$  Hz, 3H), 0.86 (d,  $J = 6.5$  Hz, 3H), 0.62 (q,  $J = 7.8$  Hz, 6H), 0.23 (s, 9H).  $^{31}\text{P}$  NMR (162 MHz,  $\text{CDCl}_3$ );  $\delta$  -0.6.  $^{13}\text{C}$  NMR (150 MHz,  $\text{CDCl}_3$ );  $\delta$  173.6, 173.5, 164.0, 156.4, 150.1, 137.7, 135.3, 134.7, 133.3, 132.8, 132.7, 132.7, 126.7, 123.0, 122.4, 121.2, 118.7, 118.6, 117.6, 80.6, 80.5, 80.3, 78.8, 78.7, 72.4, 68.5, 65.5, 65.2, 46.1, 39.7, 39.6, 39.3, 39.0, 37.4, 37.4, 37.1, 34.5, 34.0, 31.1, 30.9, 26.6, 25.7, 24.3, 24.0, 22.8, 19.9, 10.8, 10.5, 6.2, 4.5, 1.7. HRMS (ESI) Calcd for  $\text{C}_{53}\text{H}_{90}\text{NNaO}_{12}\text{PSi}_2$  ( $\text{M}+\text{Na}$ ) $^+$  = 1042.5631, found 1042.5648.

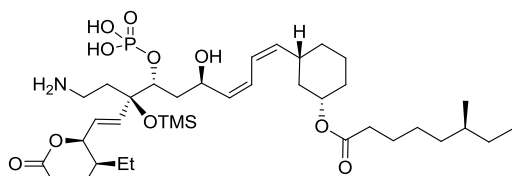

**(S)-(1S,3R)-3-((1Z,3Z,5R,7R,8R,9E)-8-(2-aminoethyl)-10-((2S,3S)-3-ethyl-6-oxo-3,6-dihydro-2H-pyran-2-yl)-5-hydroxy-7-(phosphonoxy)-8-((trimethylsilyl)oxy)deca-1,3,9-trien-1-yl)cyclohexyl 6-methyloctanoate – Leustroducsin B (1).**

Carbamate **36** (2.3 mg, 0.002 mmol),  $\text{PPh}_3$  (0.5 mg, 0.002 mmol) and  $\text{Et}_3\text{N}$  (3  $\mu\text{L}$ , 0.02 mmol) were combined in dry THF (200  $\mu\text{L}$ ). Formic acid (3.8  $\mu\text{L}$ , 0.1 mmol) was added rapidly followed by  $\text{Pd}(\text{PPh}_3)_4$  (0.5 mg, 0.0004 mmol, 20 mol%). The reaction flask was flushed with argon and heated at  $50^\circ\text{C}$  for 2 hours. The flask was cooled to room temperature and the pale yellow/light green solution was directly applied to preparative reverse phase TLC plate (Merck RP-18  $\text{F}_{254}$ ) (eluant: water/acetonitrile 35/65) to give Leustroducsin B **1** (0.7 mg, 55%) as a white waxy solid.  $[\alpha]_{\text{D}}^{23} = 91.2 \pm 1.1$  (MeOH,  $c = 0.05$ ).  $R_f$  (30%  $\text{H}_2\text{O}/\text{MeCN}$ ) = 0.10 on C18 reverse phase TLC plate.  $^1\text{H}$  NMR (400 MHz,  $\text{CD}_3\text{OD}$ ):  $\delta$  7.07 (dd,  $J = 9.9, 5.5$  Hz, 1H), 6.32-6.23 (m, 2H), 6.10-5.84 (m, 3H), 5.45 (brt,  $J = 9.0$  Hz, 1H), 5.30 (brt,  $J = 9.4$  Hz, 1H), 5.09 (brt,  $J = 5.0$  Hz, 1H), 4.93 (brt,  $J = 9.0$  Hz, 1H), 4.34-4.25 (m, 1H), 3.11-2.97 (m, 2H), 2.67-2.52 (m, 2H), 2.27 (t,  $J = 7.3$  Hz, 2H), 2.24-2.14 (m, 1H), 1.98-1.78 (m, 4H), 1.75-1.22 (m, 15H), 1.20-1.01 (m, 3H), 0.95 (t,  $J = 7.5$  Hz, 3H), 0.89-0.84 (m, 6H).  $^{13}\text{C}$  NMR (150 MHz,  $\text{CD}_3\text{OD}$ ):  $\delta$  175.1, 166.3, 152.7, 138.1, 137.4, 153.2, 133.8, 133.1, 130.0, 127.6, 124.2, 123.7, 121.0, 82.3, 73.8, 64.6, 40.5, 39.4, 37.3, 37.1, 36.1, 35.5, 35.4, 33.1, 32.4, 30.8, 30.5, 27.6, 26.5, 24.6, 23.7, 22.7, 19.6, 14.4, 11.7, 11.4. HRMS (ESI) Calcd for  $\text{C}_{34}\text{H}_{56}\text{NNaO}_{10}\text{P}$  ( $\text{M}+\text{Na}$ ) = 692.3534, found 692.3541.

## 2. $^1\text{H}$ and $^{13}\text{C}$ NMR spectra of new compounds

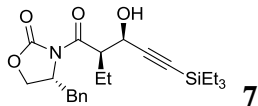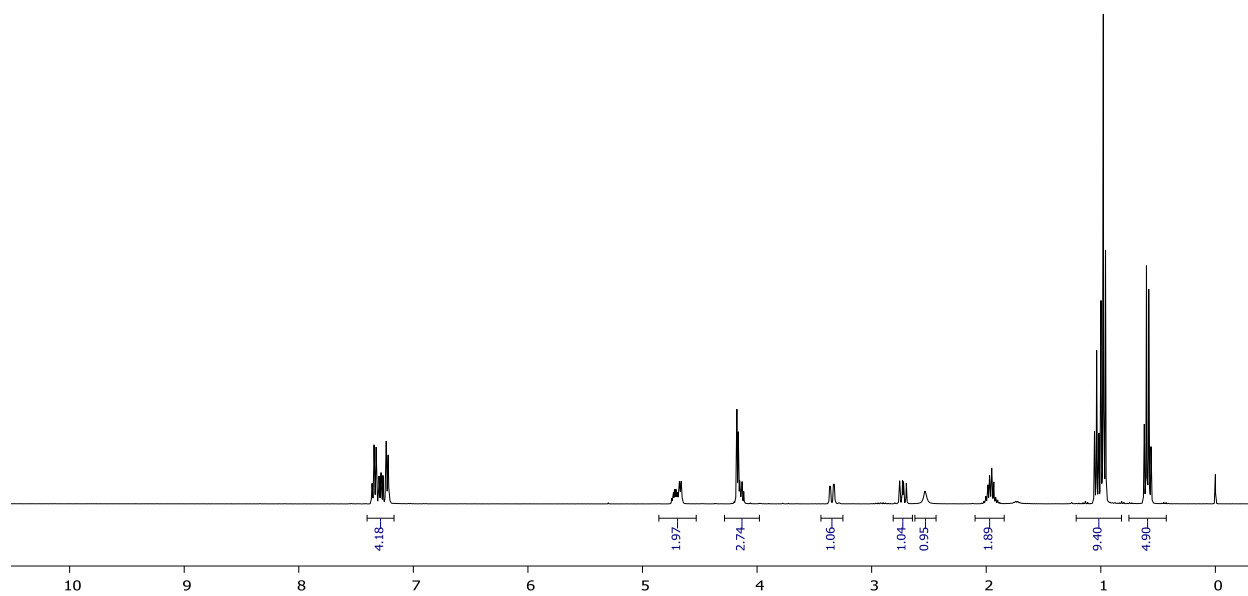

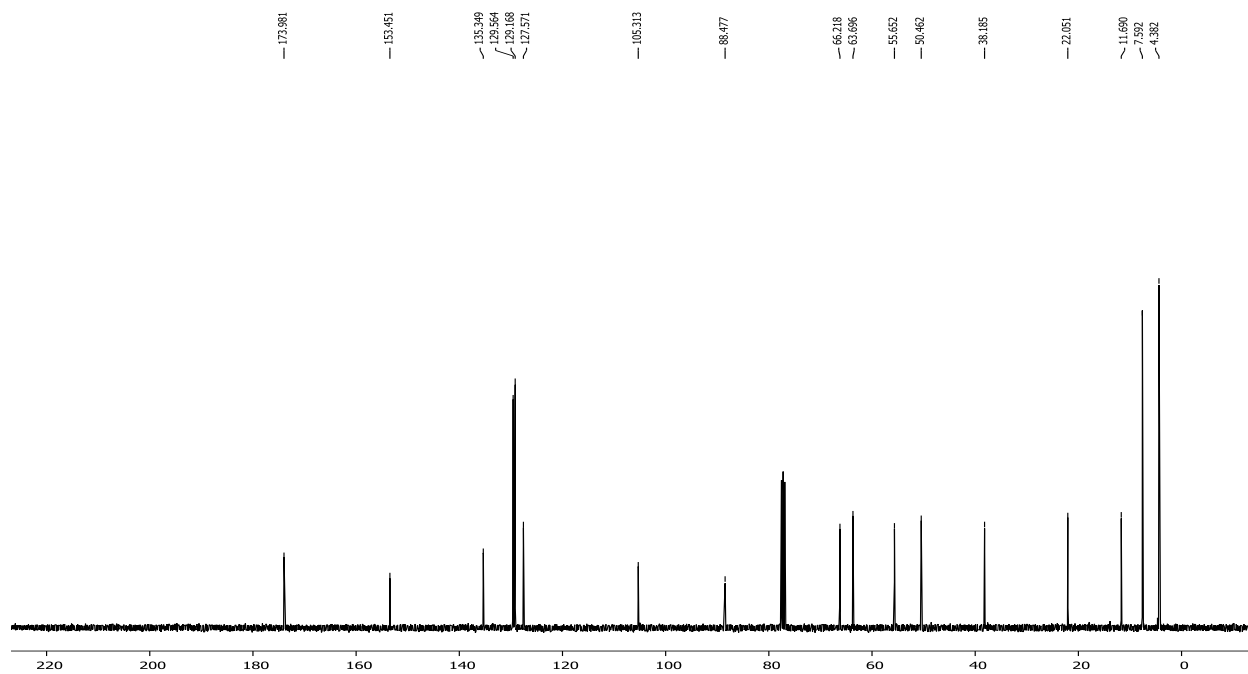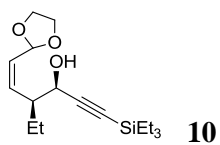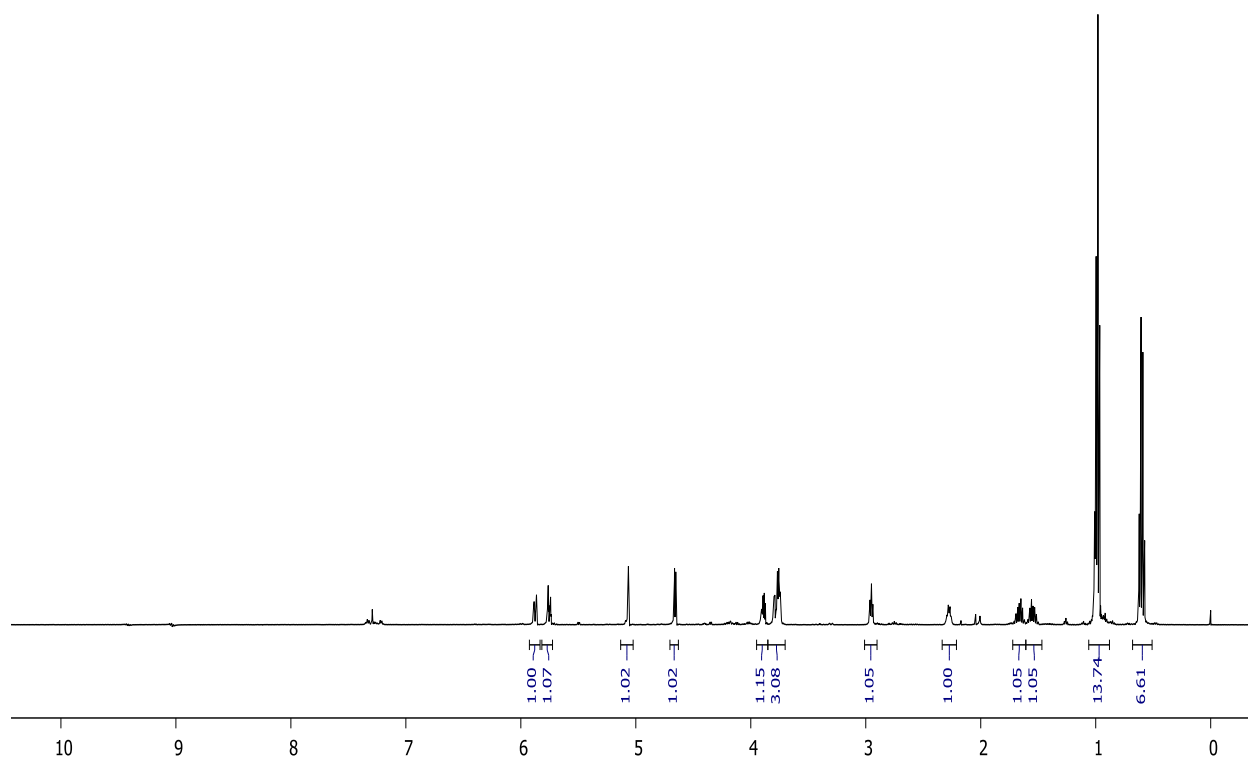

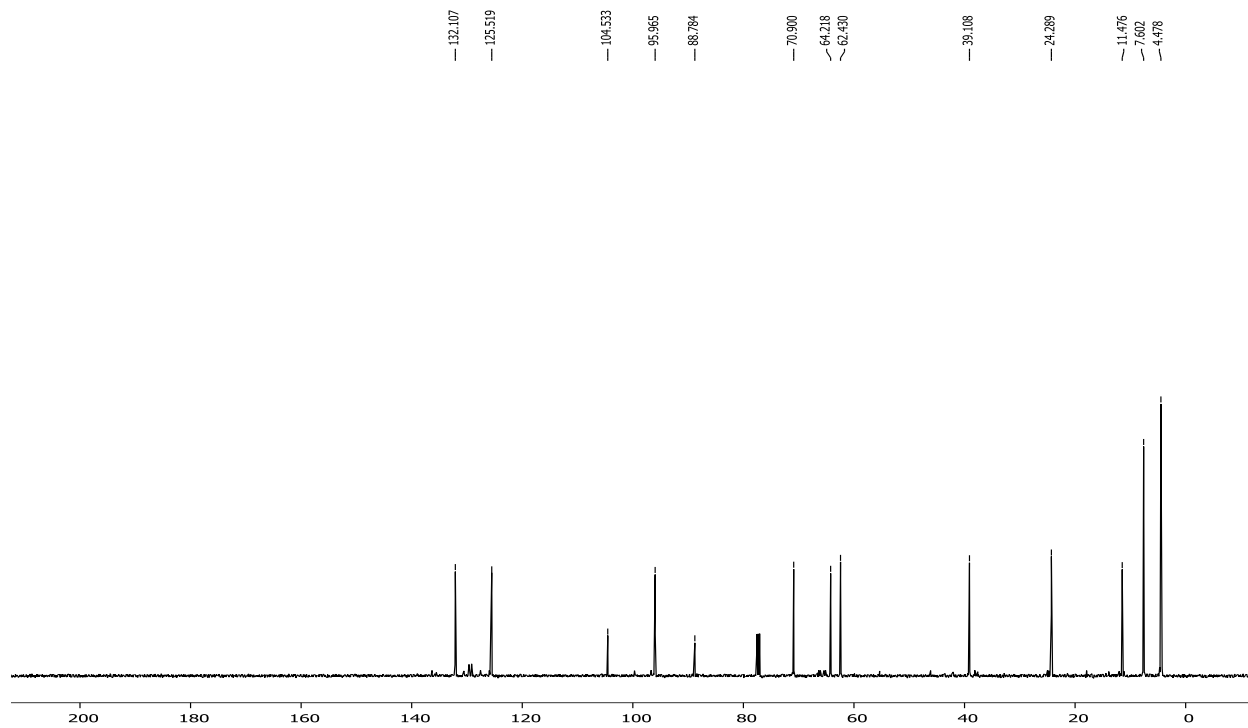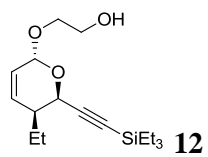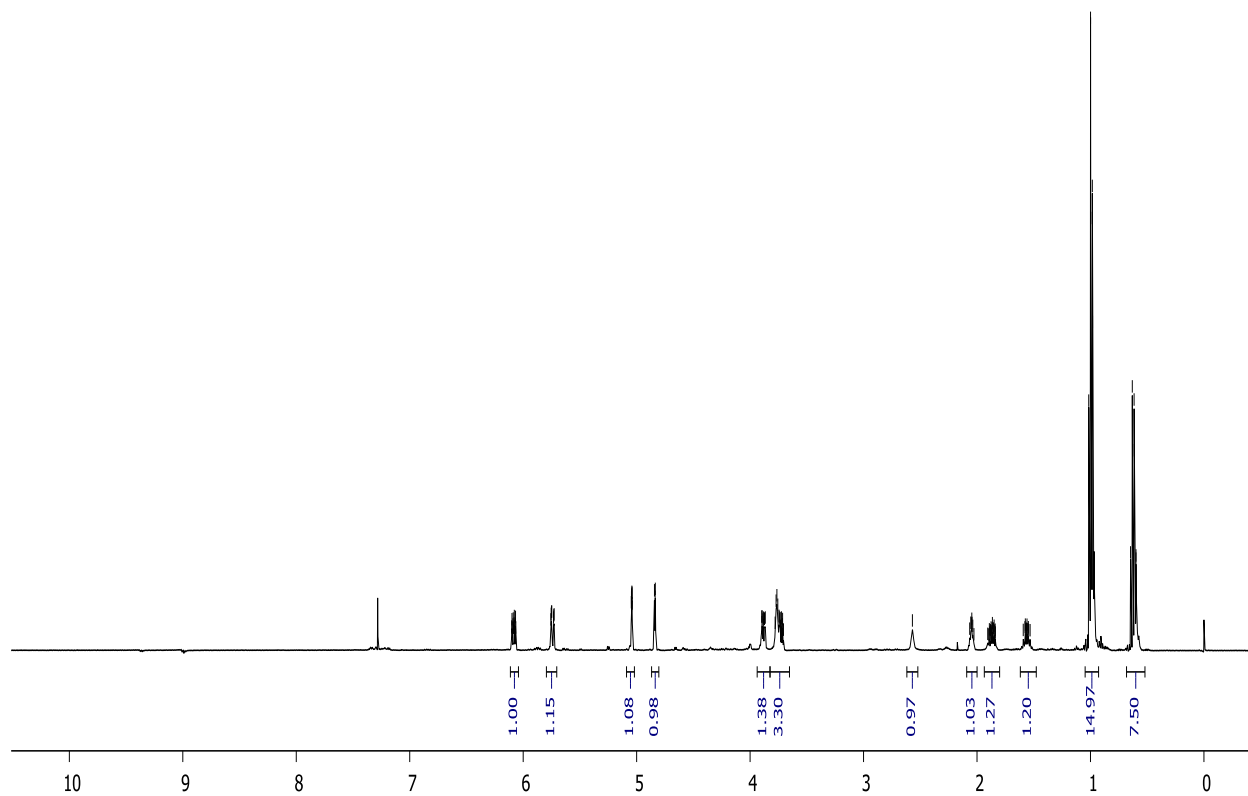

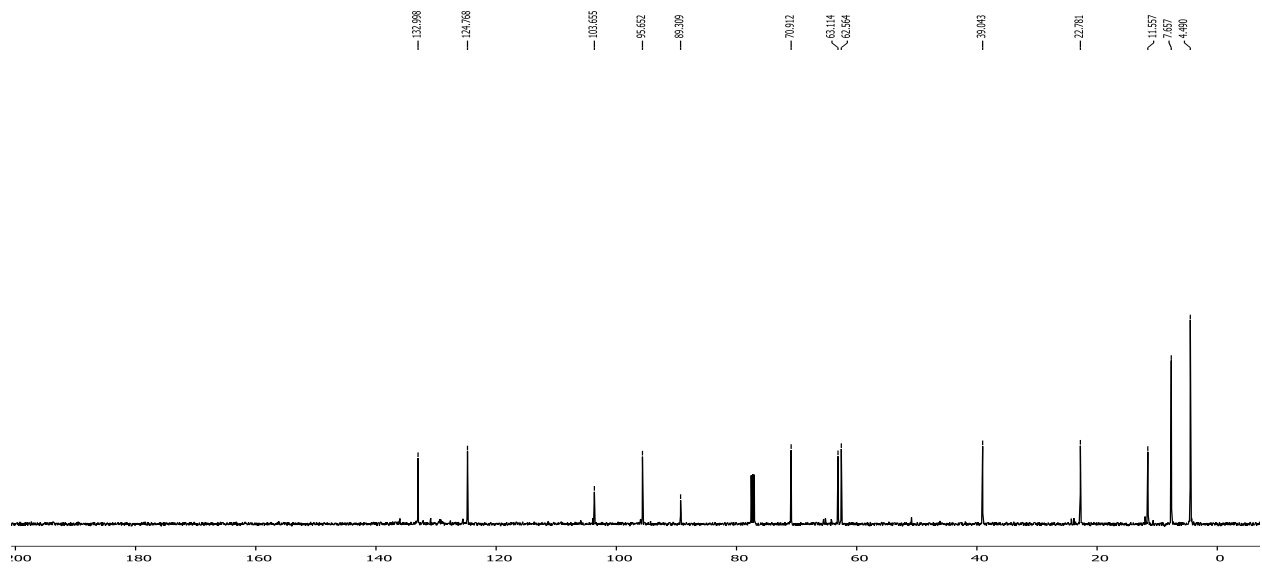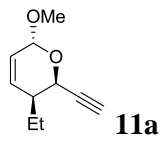

Ambient temperature  
 INOVA-500 "u1500"  
 Pulse 56.2 degrees  
 Acq. time 4.900 sec  
 Width 8000.0 Hz  
 24 repetitions  
 OBSERVE H1, 499.7485713 MHz  
 DATA PROCESSING  
 FT size 131072  
 Total time 1 hr, 25 min, 31 sec

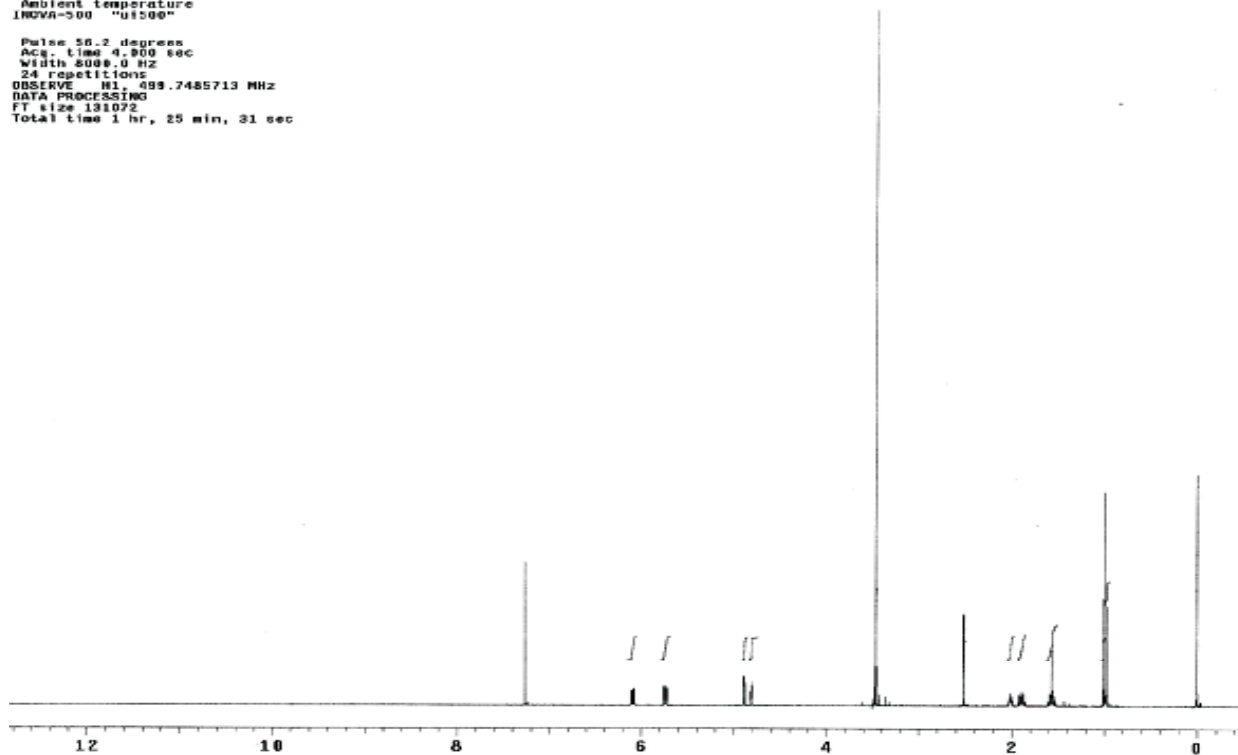

C13par  
 Pulse Sequence: s2pul  
 Solvent: CDCl3  
 Ambient temperature  
 User: j-15-87  
 INOVA-500 "u1500"  
 Relax. delay 0.500 sec  
 Pulse 33.3 degrees  
 Acq. time 1.500 sec  
 Width 33003.3 Hz  
 240 repetitions  
 OBSERVE C13, 125.6418808 MHz  
 DECOUPLE H1, 499.7505605 MHz  
 Power 42 dB  
 CONTINUOUSLY ON  
 WALTZ-16 modulated  
 DATA PROCESSING  
 Line broadening 2.0 Hz  
 FT size 131872  
 Total time 34 min, 17 sec

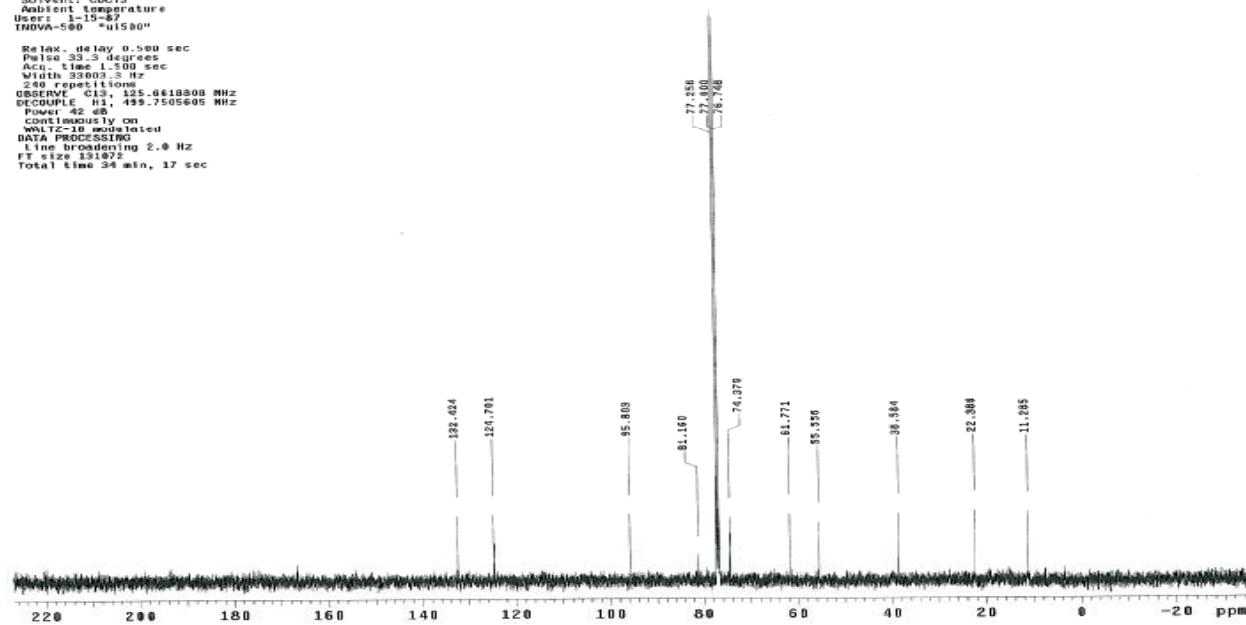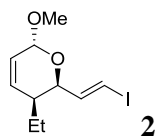

Pulse Sequence: s2pu1  
 Solvent: CDCl3  
 Ambient Temperature  
 Mercury-400BB "merc400"  
 Relax. delay 0.500 sec  
 Pulse 37.1 degrees  
 Acq. time 4.802 sec  
 Width 4997.5 Hz  
 40 repetitions  
 OBSERVE H1, 400.1115452 MHz  
 DATA PROCESSING  
 FT size 65536  
 Total time 0 min, 0 sec

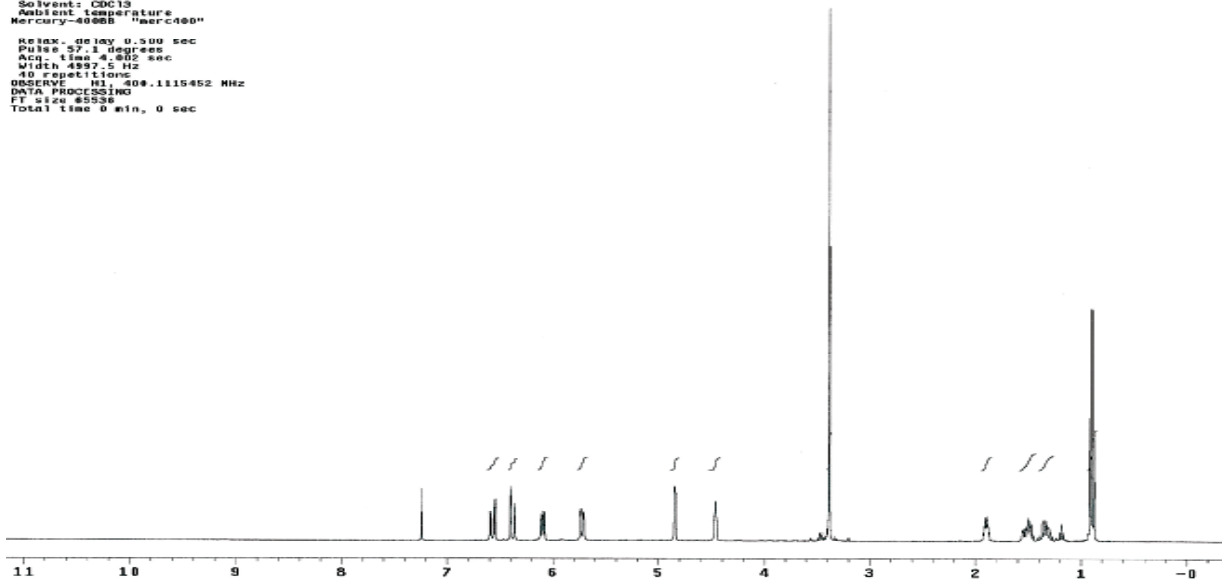

13C OBSERVE

Pulse Sequence: s2pu1  
 Solvent: CDCl3  
 Ambient Temperature  
 Mercury-400BB "merc400"  
 Relax. delay 0.500 sec  
 Pulse 30.0 degrees  
 Acq. time 1.138 sec  
 Width 25600.0 Hz  
 80 repetitions  
 OBSERVE C13, 100.608272 MHz  
 DECOUPLE H1, 400.1135562 MHz  
 Power 43 dB  
 continuously on  
 ONLY C-13 excited  
 DATA PROCESSING  
 Line broadening 0.5 Hz  
 FT size 65536  
 Total time 33 min, 33 sec

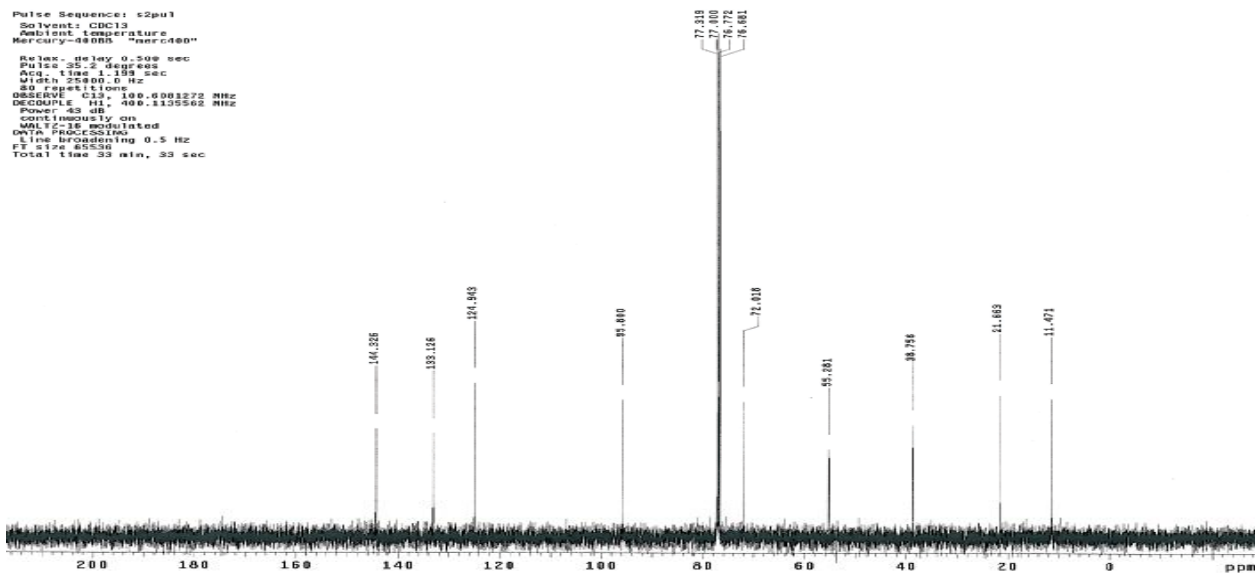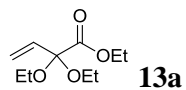



Solvent: CDCl3  
 Ambient temperature  
 INOVA-500 "q1509"  
 Pulse 56.2 degrees  
 Acq. time 4.900 sec  
 Width 8000.0 Hz  
 24 repetitions  
 OBSERVE H1 499.7485706 MHz  
 DATA PROCESSING  
 FT size 131072  
 Total time 1 hr, 25 min, 31 sec

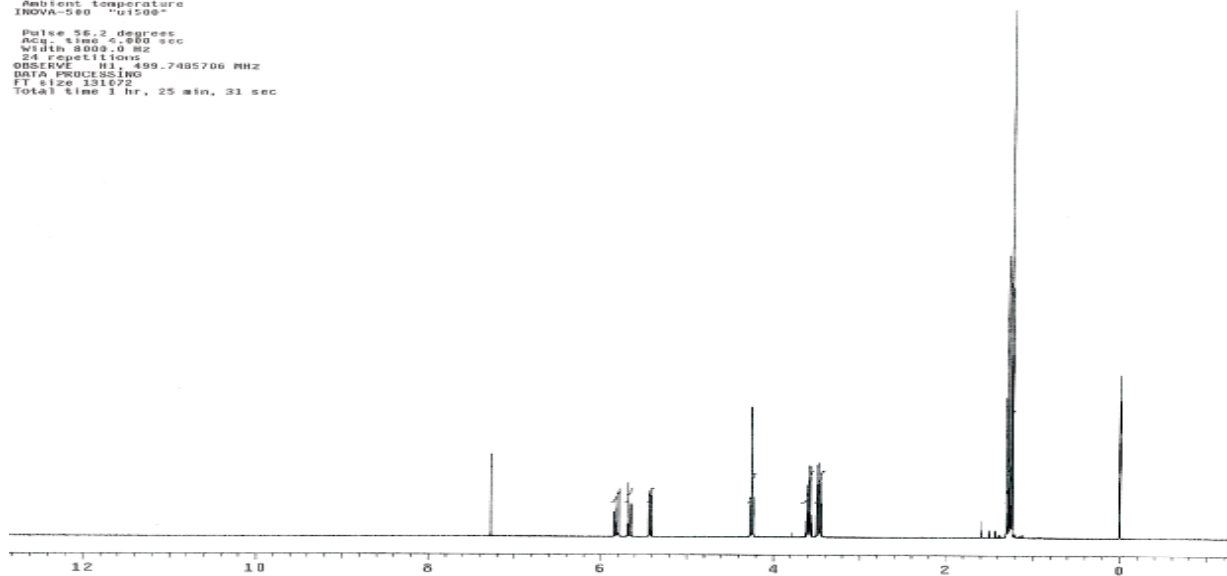

13C OBSERVE

Pulse Sequence: s2pu1  
 Solvent: CDCl3  
 Ambient temperature  
 Mercury-4000B "mercd40"  
 Relax. delay 0.500 sec  
 Pulse 35.2 degrees  
 Acq. time 1.135 sec  
 Width 25000.0 Hz  
 128 repetitions  
 OBSERVE C13 100.4081288 MHz  
 DECOUPLE H1 400.1135562 MHz  
 Power 15.08  
 continuous ly on  
 WALTZ-16 modulated  
 DATA PROCESSING  
 Line Dr Coadding 0.5 Hz  
 FT size 65536  
 Total time 33 min, 33 sec

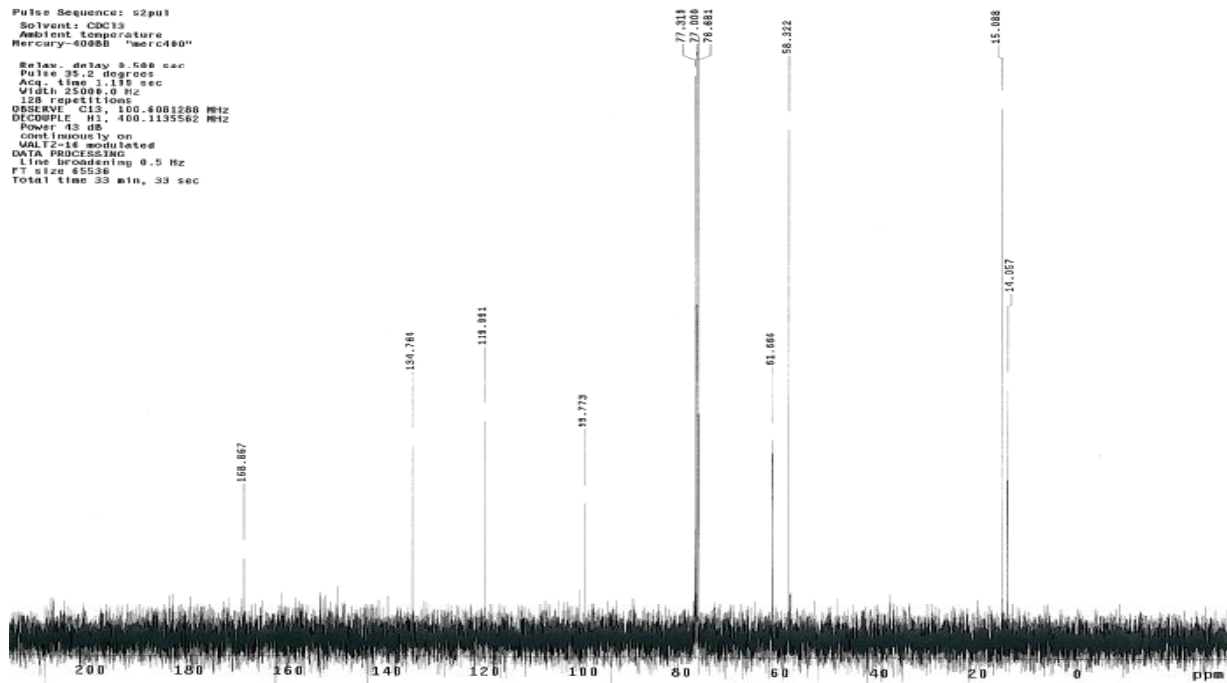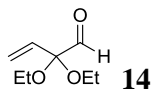

Relax. delay 1.000 sec  
 Pulse 30.8 degrees  
 Acq. time 7.563 sec  
 Width 6085.0 Hz  
 8 repetitions  
 OBSERVE H1, 399.7473754 MHz  
 DATA PROCESSING  
 FT size 32768  
 Total time 7 min, 29 sec

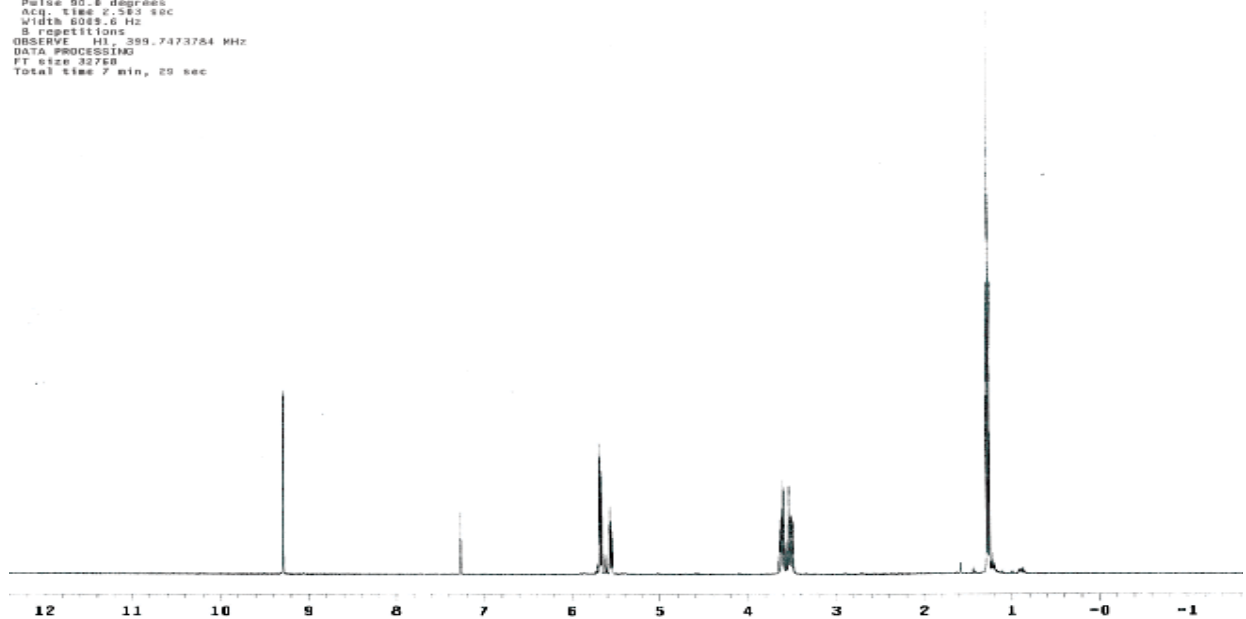

128 OBSERVE  
 128  
 Pulse Sequence: s2ps1  
 Solvent: CDCl3  
 Ambient temperature  
 Mercury-40000 "merq4000"  
 Relax. delay 1.000 sec  
 Pulse 34.8 degrees  
 Acq. time 1.59 sec  
 Width 25800.0 Hz  
 64 repetition  
 OBSERVE C13, 100.6081021 MHz  
 DECOUPLE H1, 400.113562 MHz  
 Power 35 dB  
 Continuously on  
 WALTZ-16 modulated  
 DATA PROCESSING  
 Line broadening 1.0 Hz  
 FT size 83536  
 Total time 42 min, 5 sec

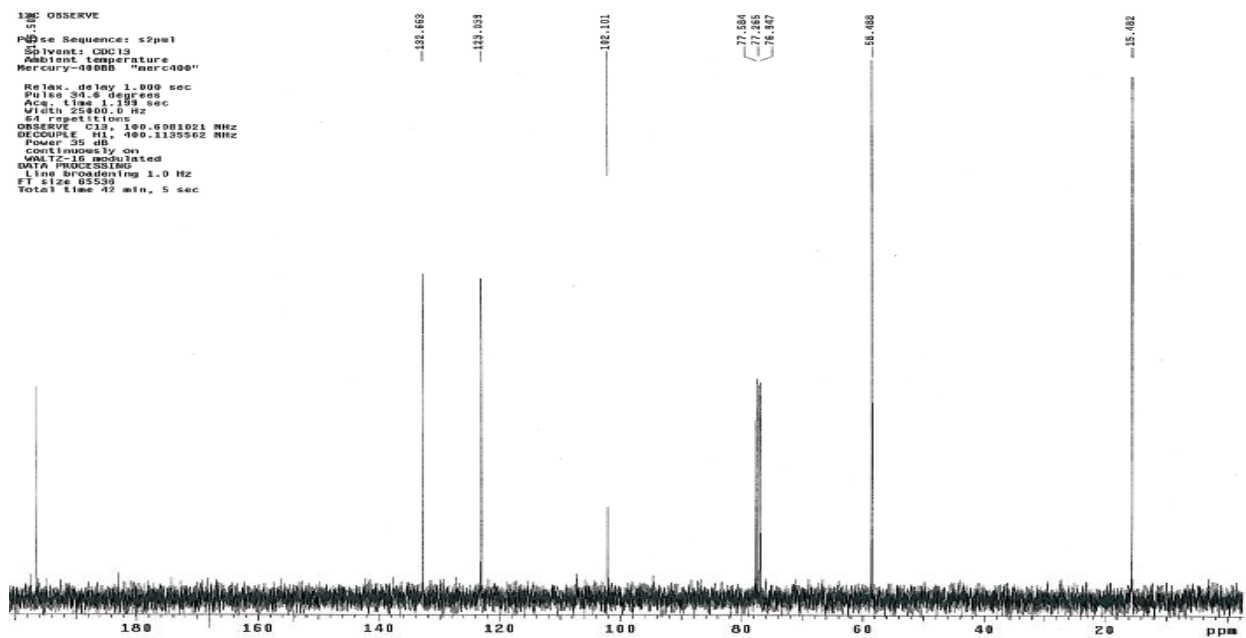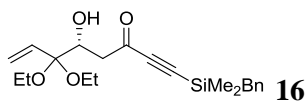

Pulse Sequence: s2pu1  
 Solvent: cdc13  
 Temp: 25.1 C / 298.1 K  
 Operator: cheyenne  
 VNMRB-400 "nmr400"

Relax. delay 8.500 sec  
 Pulse 45.4 degree  
 Acq. time 4.400 sec  
 Width 5005.4 Hz  
 28 repetitions  
 OBSERVE H1, 399.7473848 MHz  
 DATA PROCESSING  
 FT size 65536  
 Total time 9 min, 37 sec

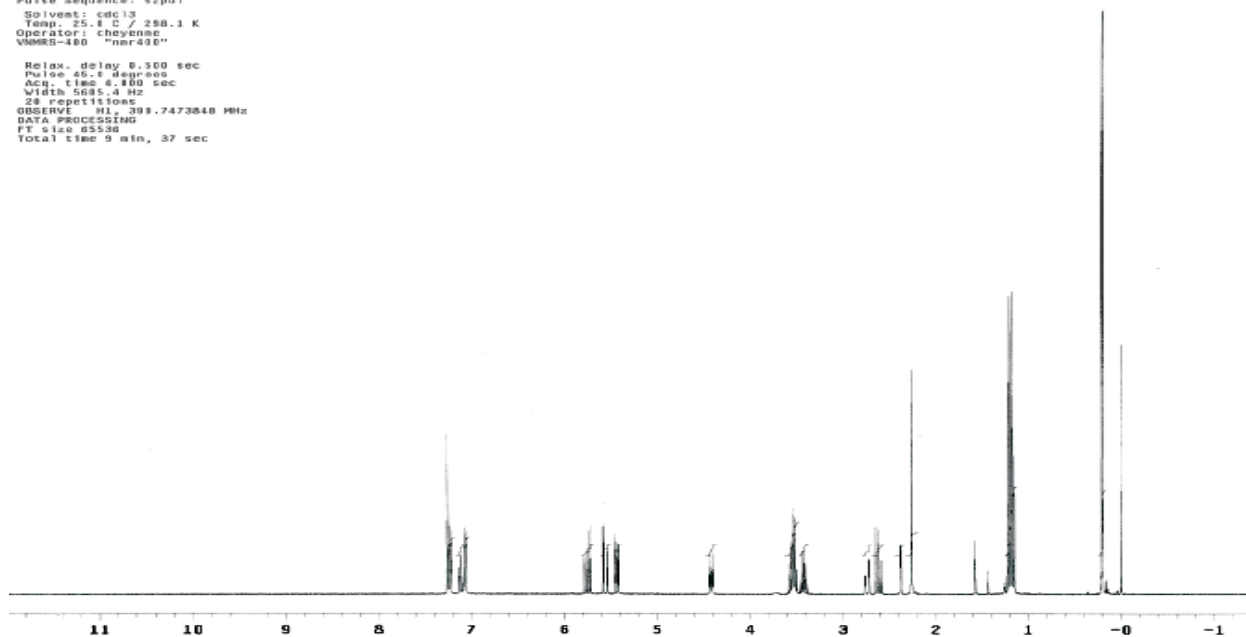

C13par  
 Pulse Sequence: s2pu1  
 Solvent: CDC13  
 Ambient temperature  
 User: 1-13-87  
 INOVA-500 "nit500"

Relax. delay 8.500 sec  
 Pulse 31.4 degree  
 Acq. time 1.500 sec  
 Width 30000.3 Hz  
 138 repetitions  
 OBSERVE C13, 125.6618808 MHz  
 DECOUPLE H1, 499.7505605 MHz  
 Power 42 dB  
 continuously on  
 WALTZ-16 modulated  
 DATA PROCESSING  
 Line Broadening 2.0 Hz  
 FT size 181072  
 Total time 34 min, 17 sec

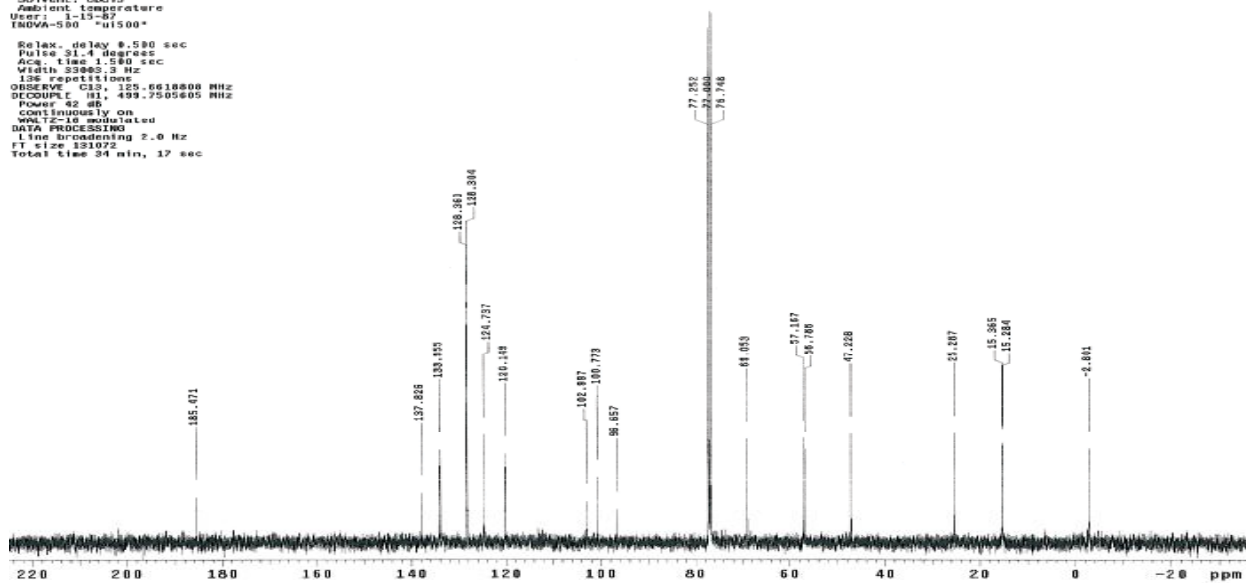

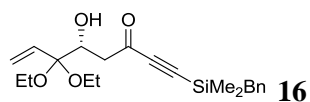

HPLC Conditions: OD column, 98:2 heptane:isopropanol, 1.0 mL/min, 254 nm

racemic:

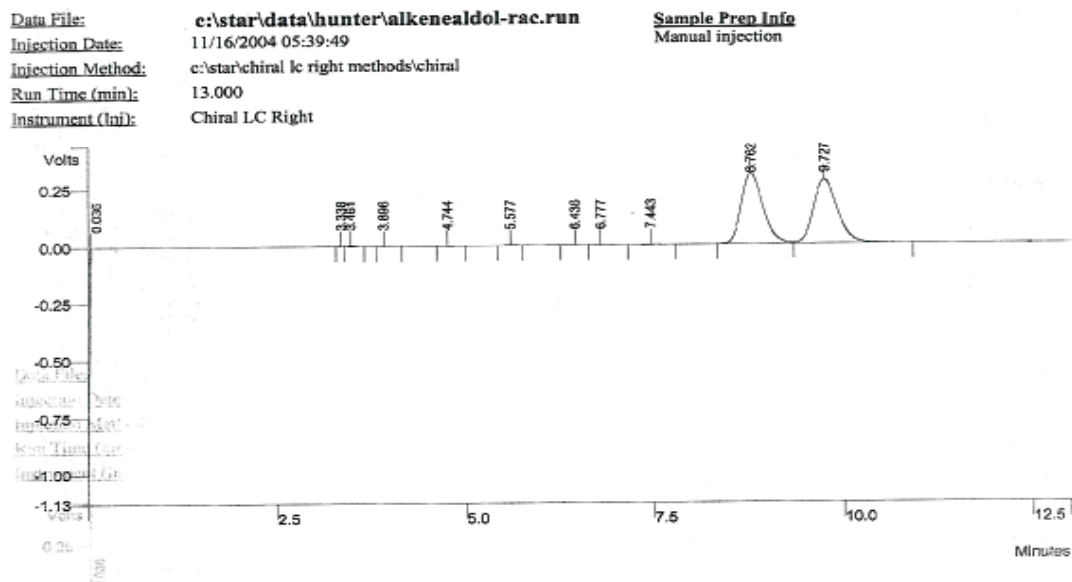

99% ee:

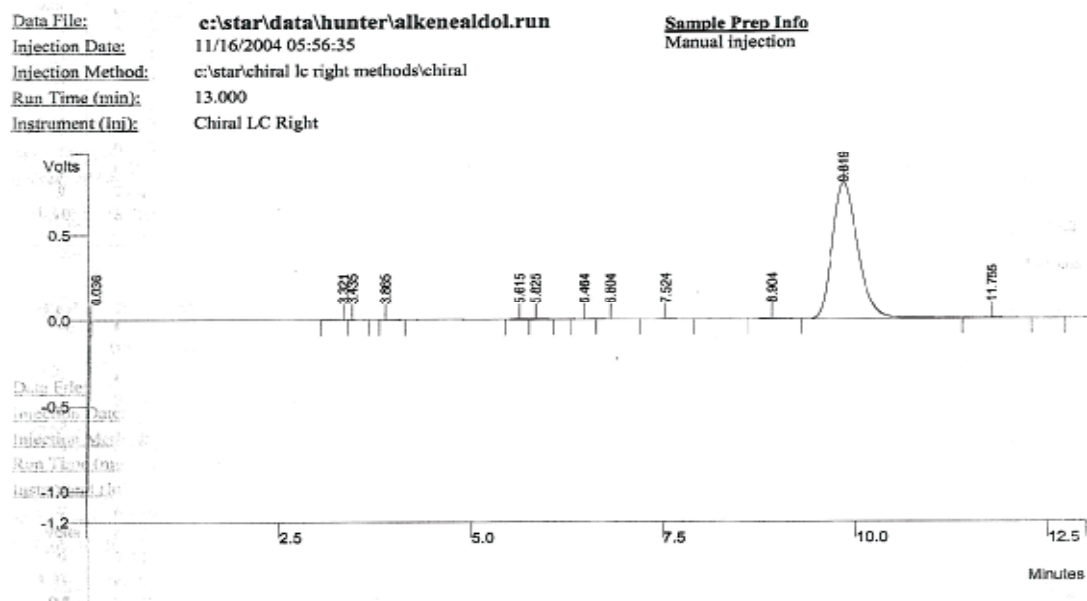

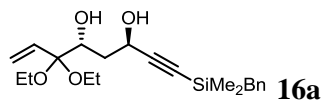

Pulse Sequence: s2pul  
 Solvent: CDCl3  
 Ambient temperature  
 INOVA-500 "ui500"

Pulse 69.0 degrees  
 Acq. time 4.960 sec  
 Width 3000.0 Hz  
 44 repetitions  
 OBSERVE H1, 499.7485728 MHz  
 DATA PROCESSING  
 FT size 131072  
 Total time 8 min, 33 sec

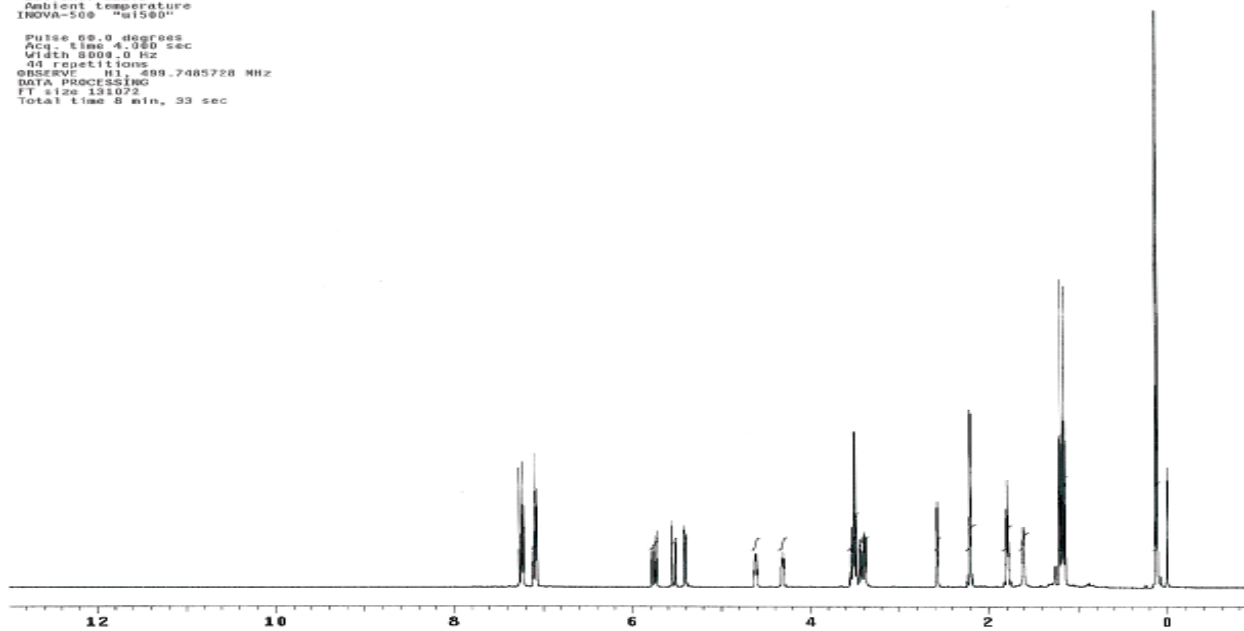

CLSpur  
 Pulse Sequence: s2pul  
 Solvent: CDCl3  
 Ambient temperature  
 User: 1-15-87  
 INOVA-500 "ui500"

Relax. delay 0.500 sec  
 Pulse 33.3 degrees  
 Acq. time 1.500 sec  
 Width 3200.0 Hz  
 34 repetitions  
 OBSERVE C13, 125.6618839 MHz  
 DECOUPLE H1, 499.7505605 MHz  
 Power 42 dB  
 continuously on  
 WALTZ-16 modulated  
 DATA PROCESSING  
 Line broadening 2.0 Hz  
 FT size 131072  
 Total time 34 min, 17 sec

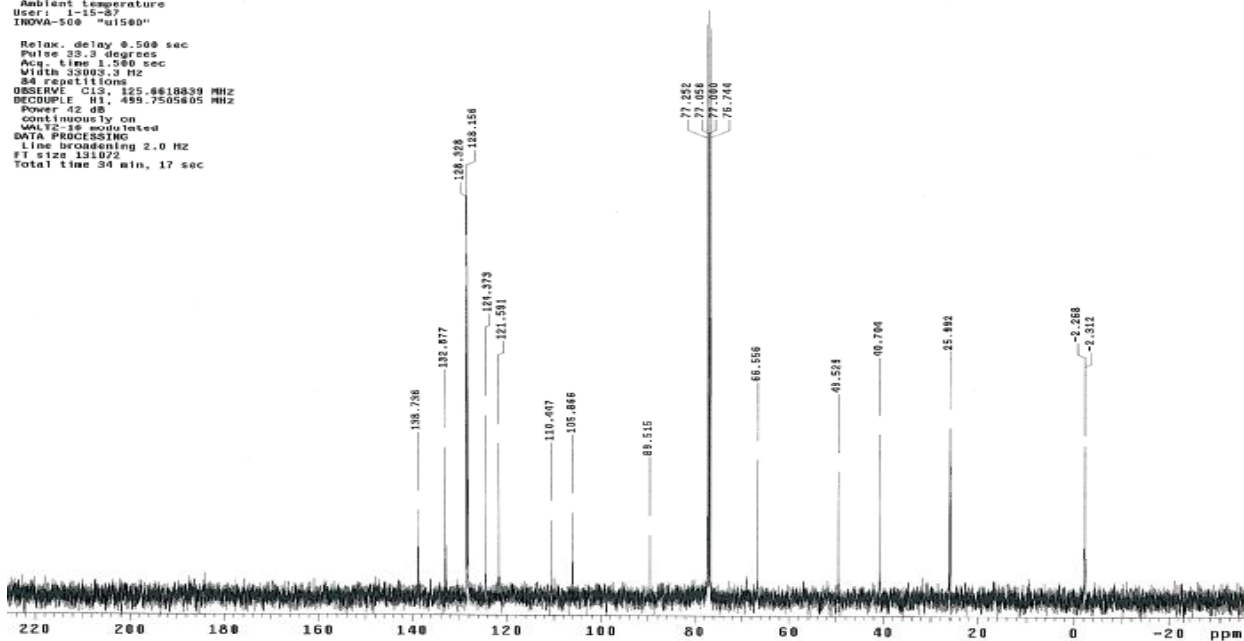

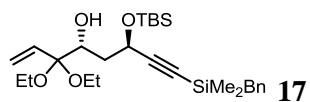

Pulse Sequence: s2pul  
 Solvent: cdcl3  
 Temp: 23.0 C / 296.1 K  
 Operator: cheyenne  
 NMR5-400 "nar400"  
 Relax. delay 0.568 sec  
 Pulse 45.0 degrees  
 Acq. time 4.809 sec  
 Width 5285.4 Hz  
 24 repetitions  
 OBSERVE H1, 399.7473846 MHz  
 DATA PROCESSING  
 F1 size 65536  
 Total time 9 min, 37 sec

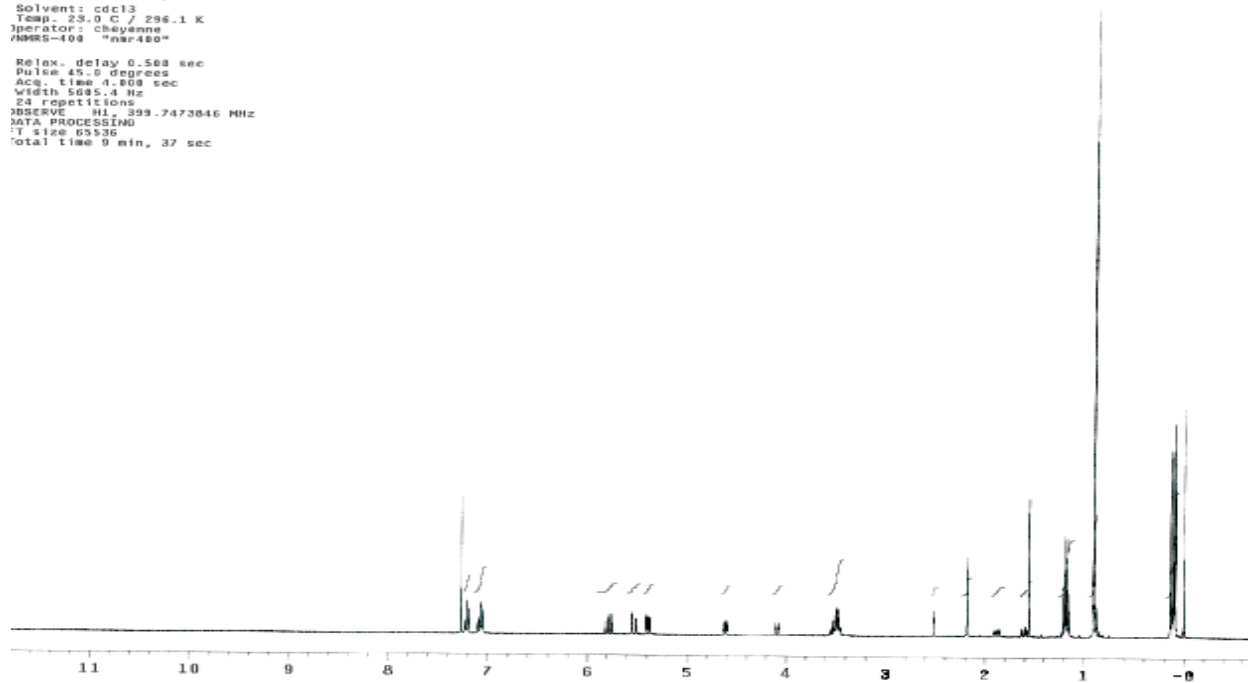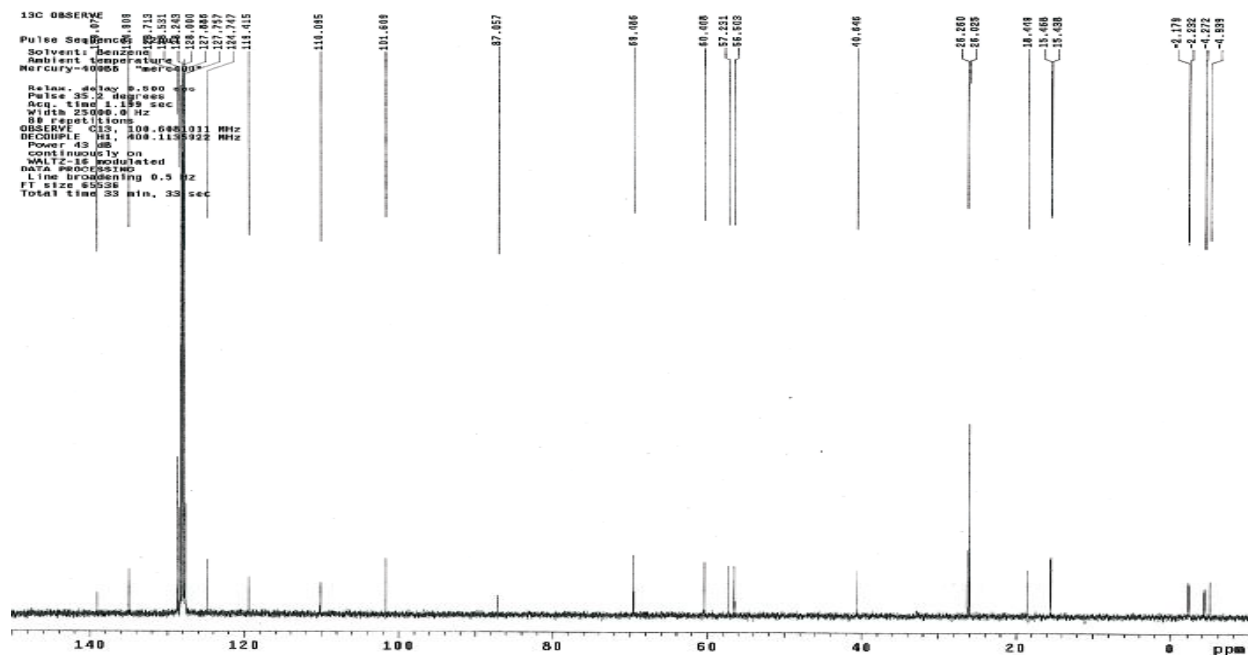

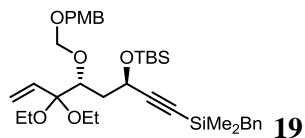

Pulse Sequence: s2pu1  
 Solvent: CDCl3  
 Ambient temperature  
 INOVA-500 "u1500"  
 Pulse 56.2 degrees  
 Acq. time 4.300 sec  
 Width 8000.0 MHz  
 8 repetitions  
 OBSERVE H1, 499.7485730 MHz  
 DATA PROCESSING  
 FT size 131022  
 Total time 1 hr, 25 min, 31 sec

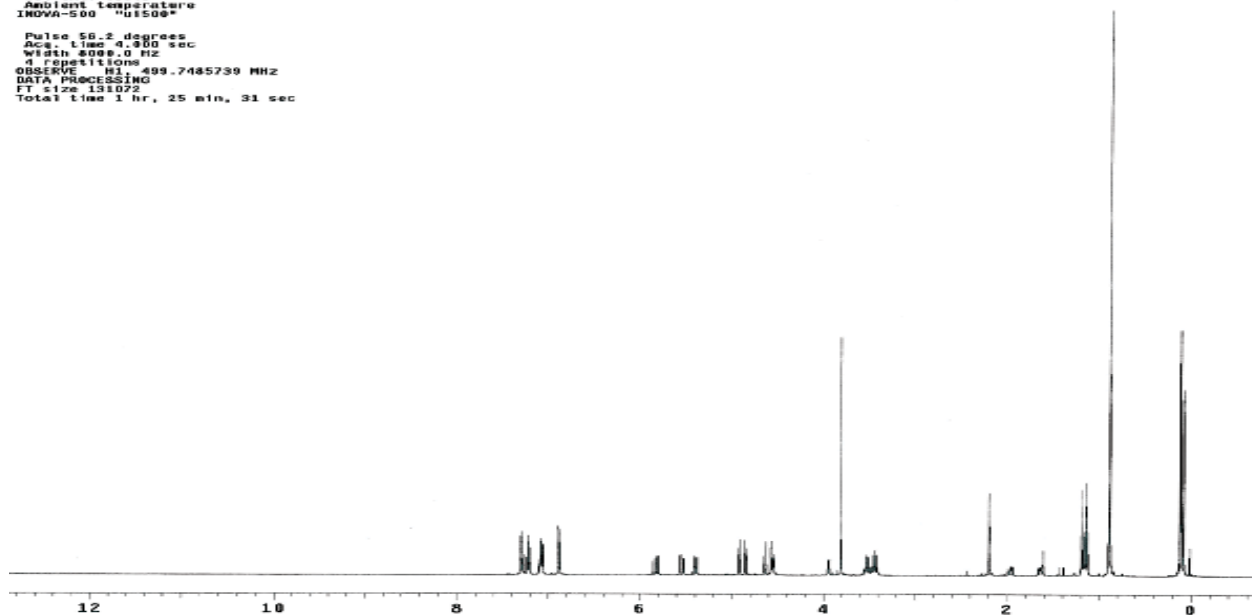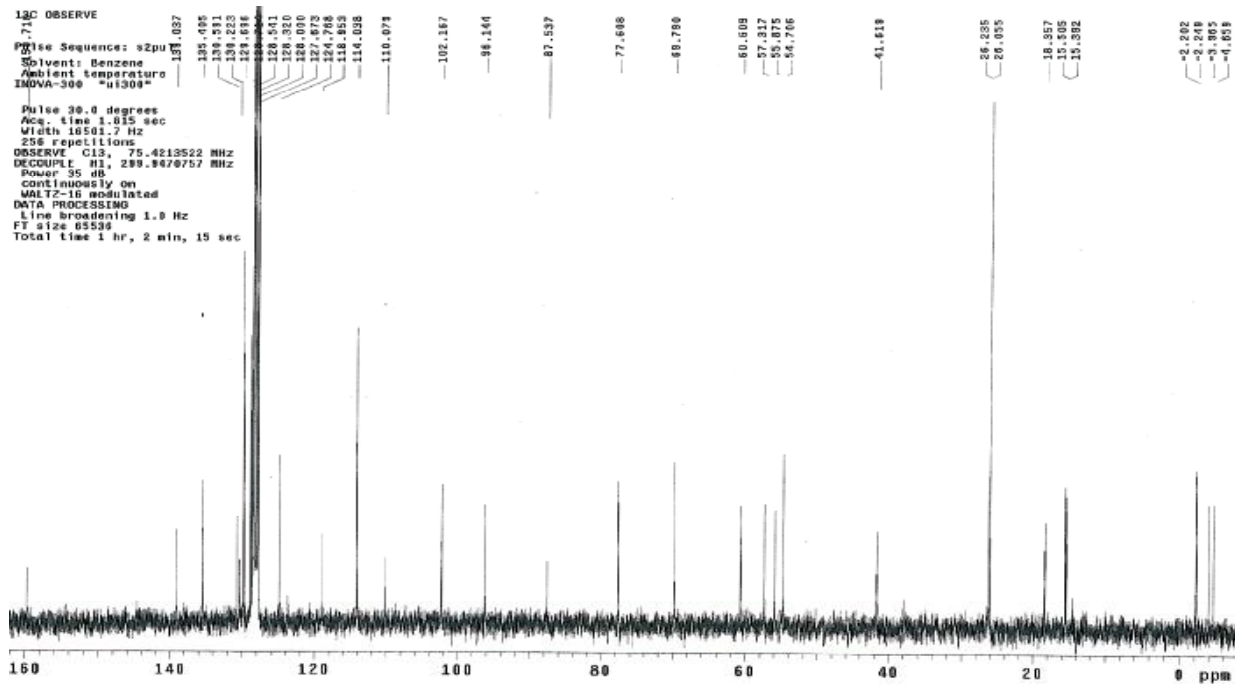

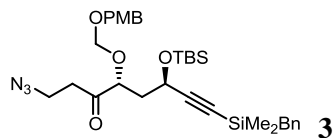

Pulse Sequence: s2ps1  
 Solvent: CDCl<sub>3</sub>  
 Ambient temperature  
 Mercury-40055 "merc400"  
 Relax. delay 0.500 sec  
 Pulse 57.1 degrees  
 Acq. time 4.082 sec  
 Width 4937.5 Hz  
 24 repetitions  
 OBSERVE H1, 490.1115375 MHz  
 DATA PROCESSING  
 FT size 65536  
 Total time 0 min, 0 sec

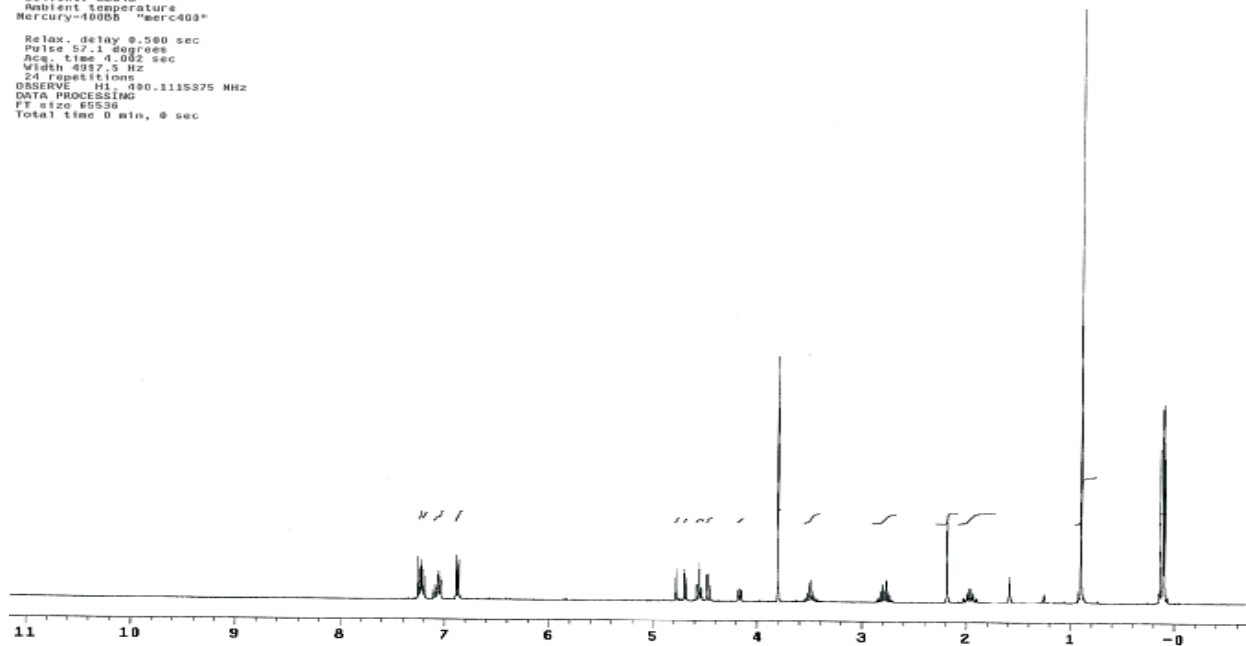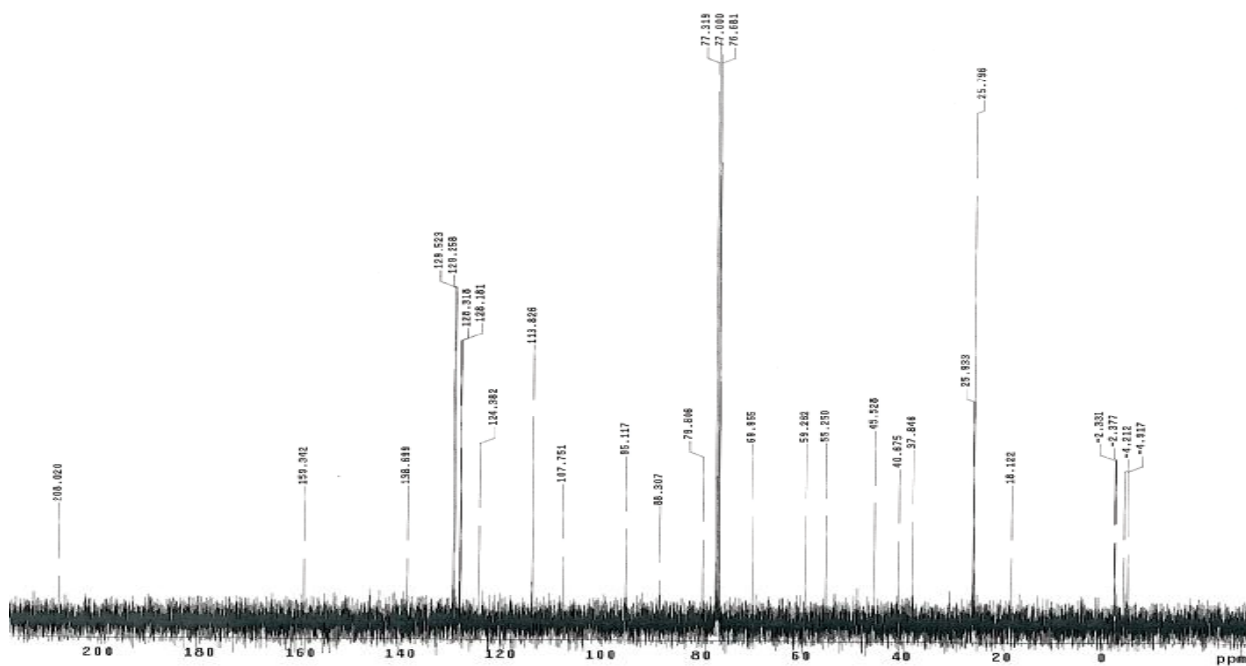



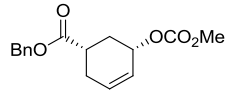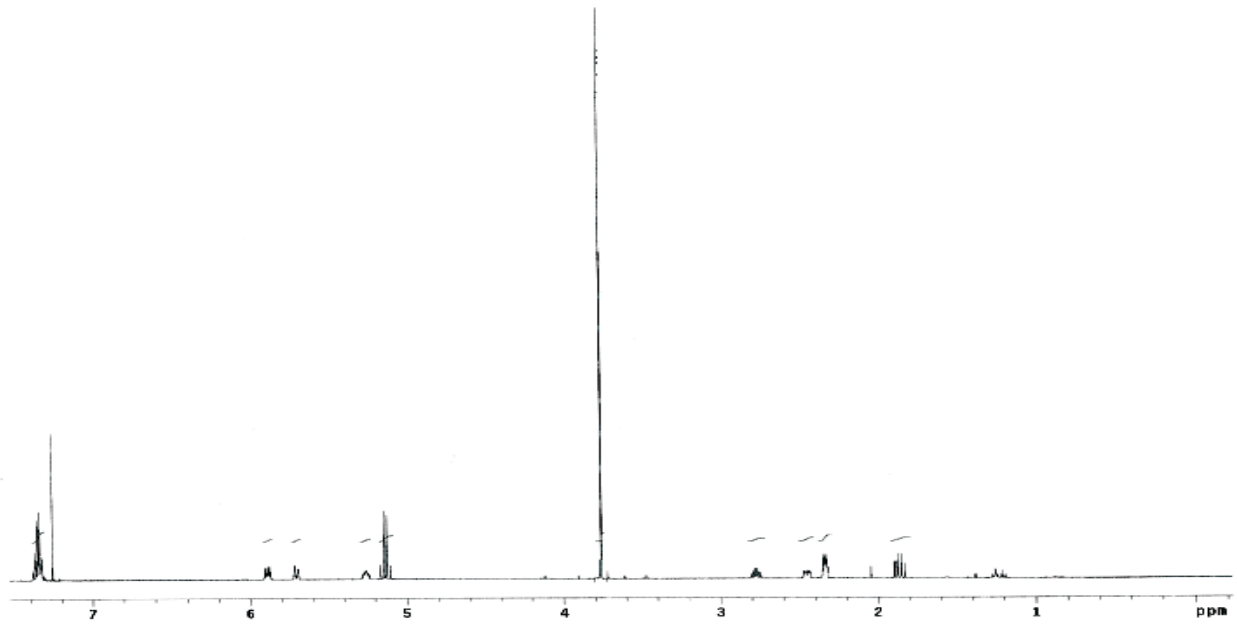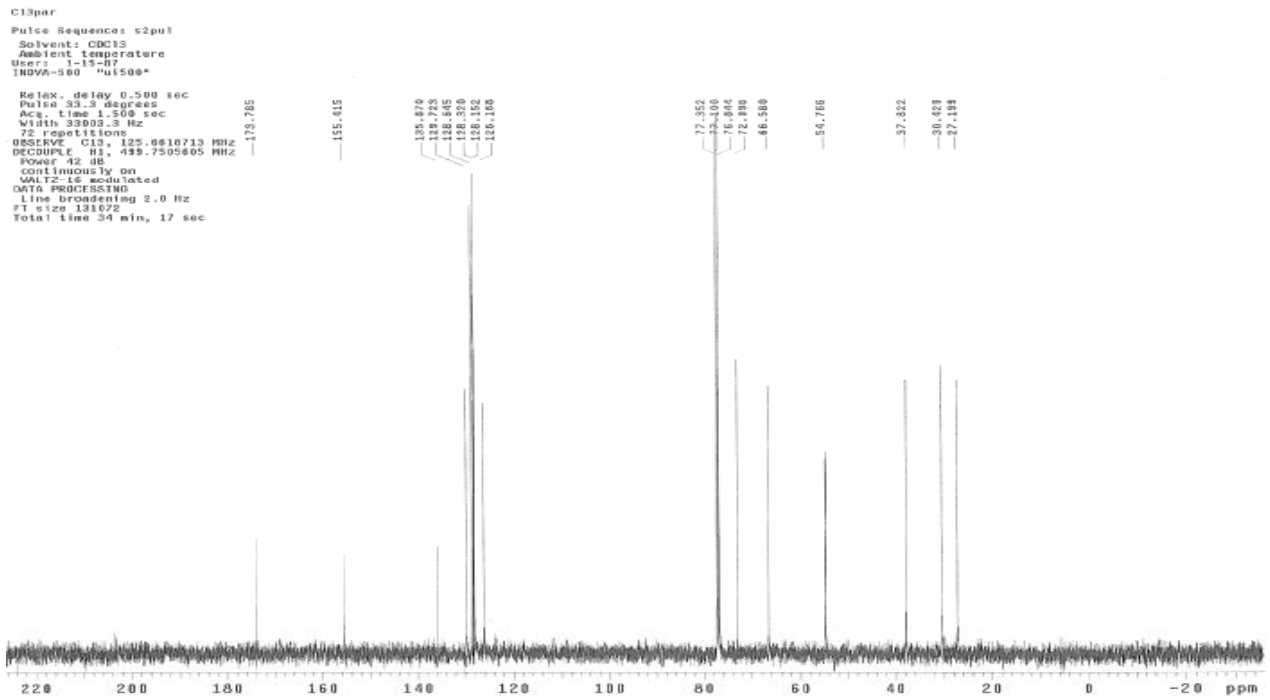

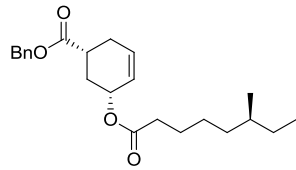

23

Pulse Sequence: s2pu1  
 Solvent: CDCl3  
 Ambient temperature  
 INOVA-500 "u150s"  
 Pulse 56.2 degrees  
 Acq. time 4.000 sec  
 Width 690.0 Hz  
 48 repetitions  
 OBSERVE H1, 499.7485738 MHz  
 DATA PROCESSING  
 FT size 131672  
 Total time 8 min, 33 sec

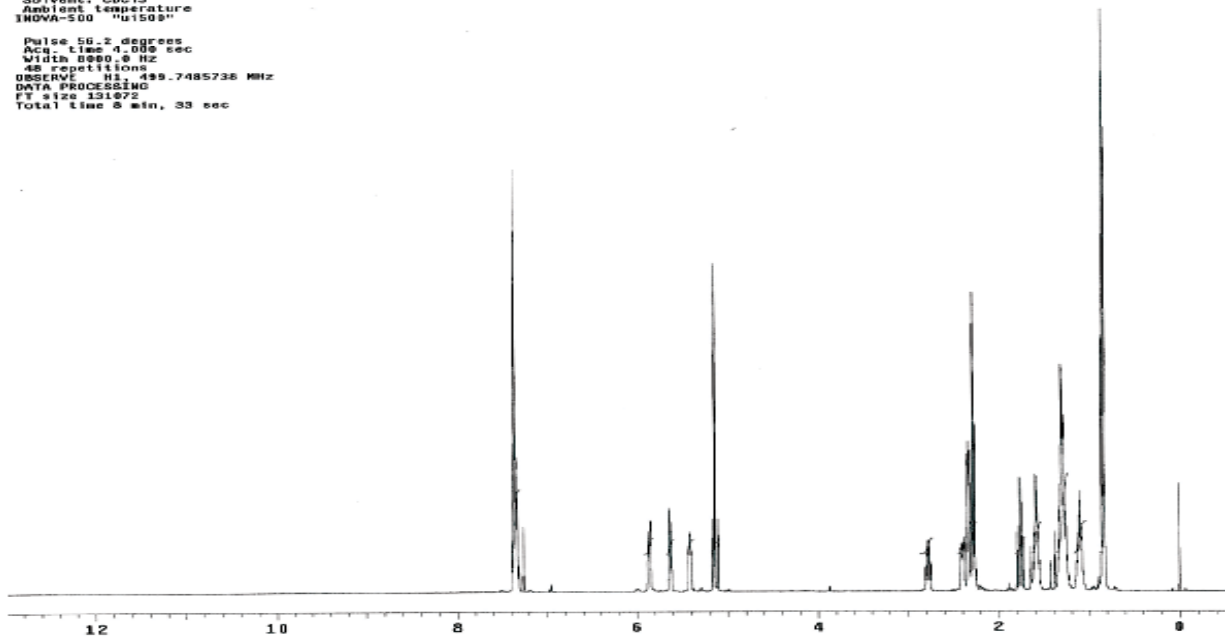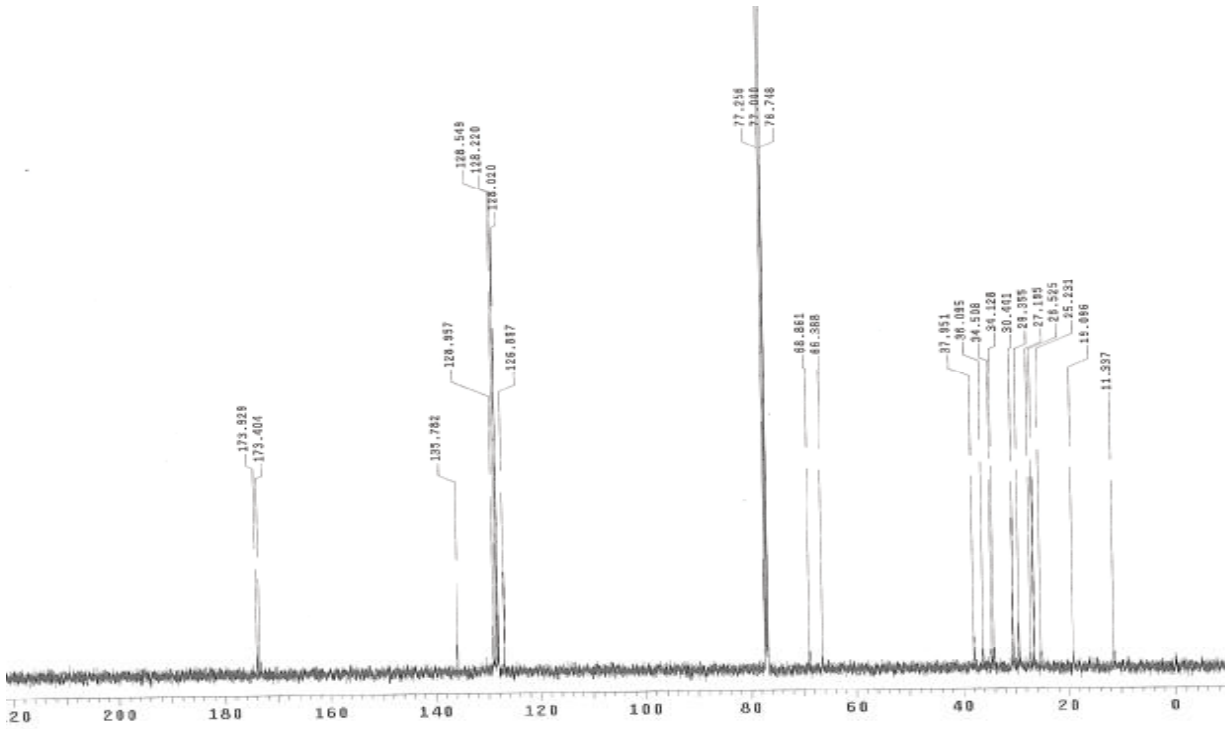

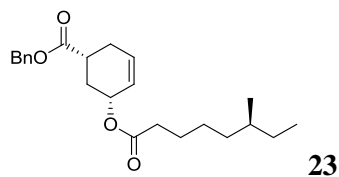

HPLC Conditions: OD column, 99:1 heptane:isopropanol, 1.0 mL/min, 254 nm

racemic:

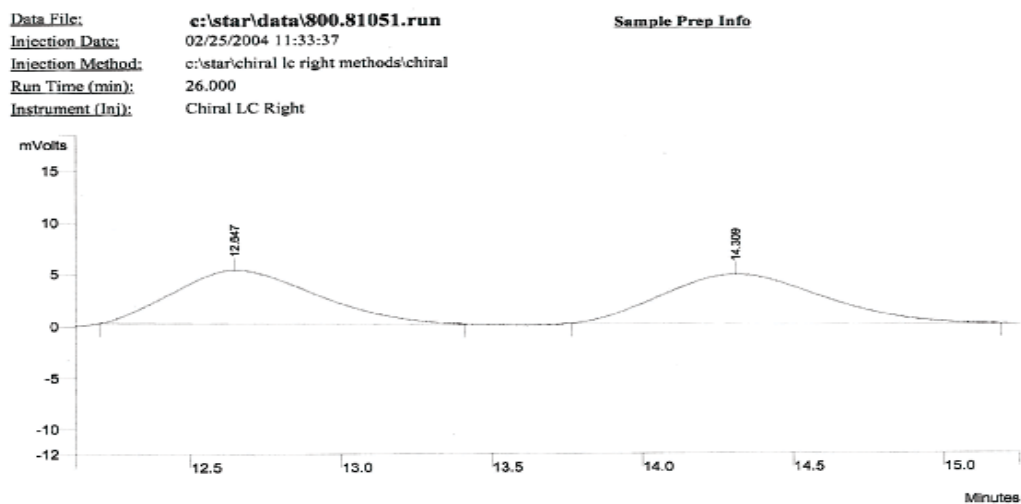

99% ee:

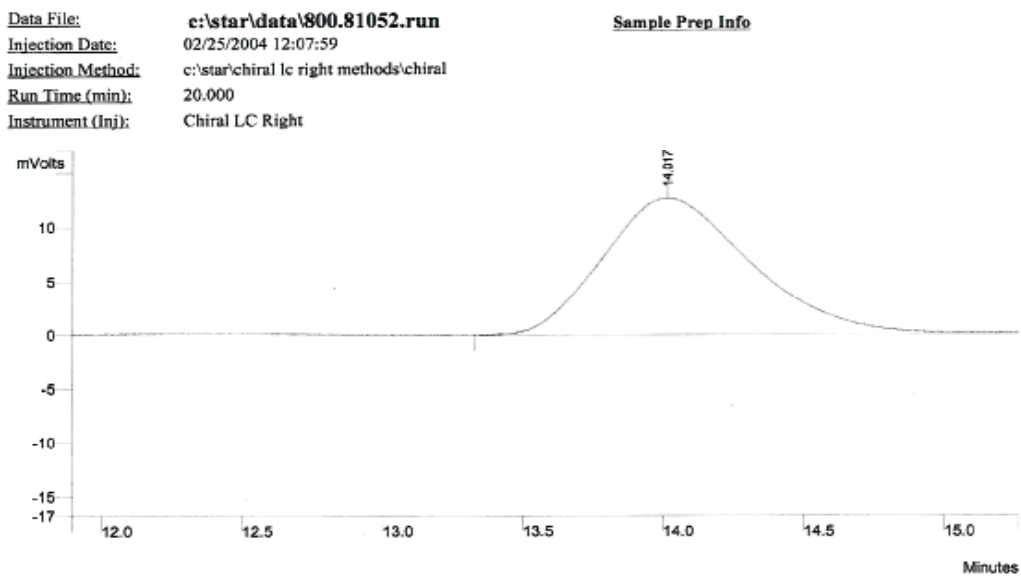



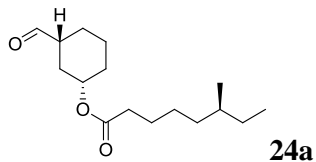

**STANDARD PROTON PARAMETERS**

Pulse Sequence: s2pu1  
 Solvent: CDCl3  
 Ambient Temperature  
 INOVA-500 "ui500"  
 Pulse 56.3 degrees  
 Acq. time 4.500 sec  
 Width 2000.0 Hz  
 40 repetitions  
 OBSERVE H1 499.7485735 MHz  
 DATA PROCESSING  
 FT size 131872  
 Total time 1 hr, 25 min, 31 sec

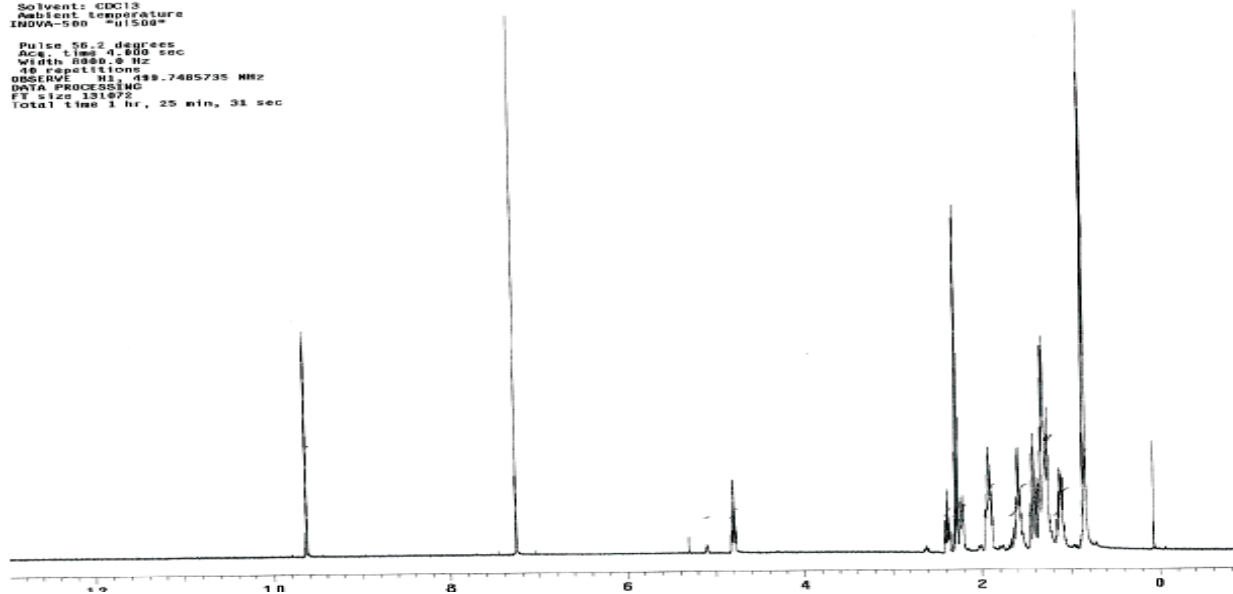

**C13cpd**

Pulse Sequence: s2pu1  
 Solvent: CDCl3  
 Ambient Temperature  
 User: j-15-87  
 INOVA-500 "ui500"  
 Relax. delay 0.580 sec  
 Pulse 33.3 degrees  
 Acq. time 1.400 sec  
 Width 33000.0 Hz  
 210 repetitions  
 OBSERVE C13 125.6618678 MHz  
 DECOUPLE H1 499.7505805 MHz  
 Power 42 dB  
 Continuously on  
 WALTZ-16 modulated  
 DATA PROCESSING  
 Line broadening 2.0 Hz  
 FT size 131872  
 Total time 34 min, 17 sec

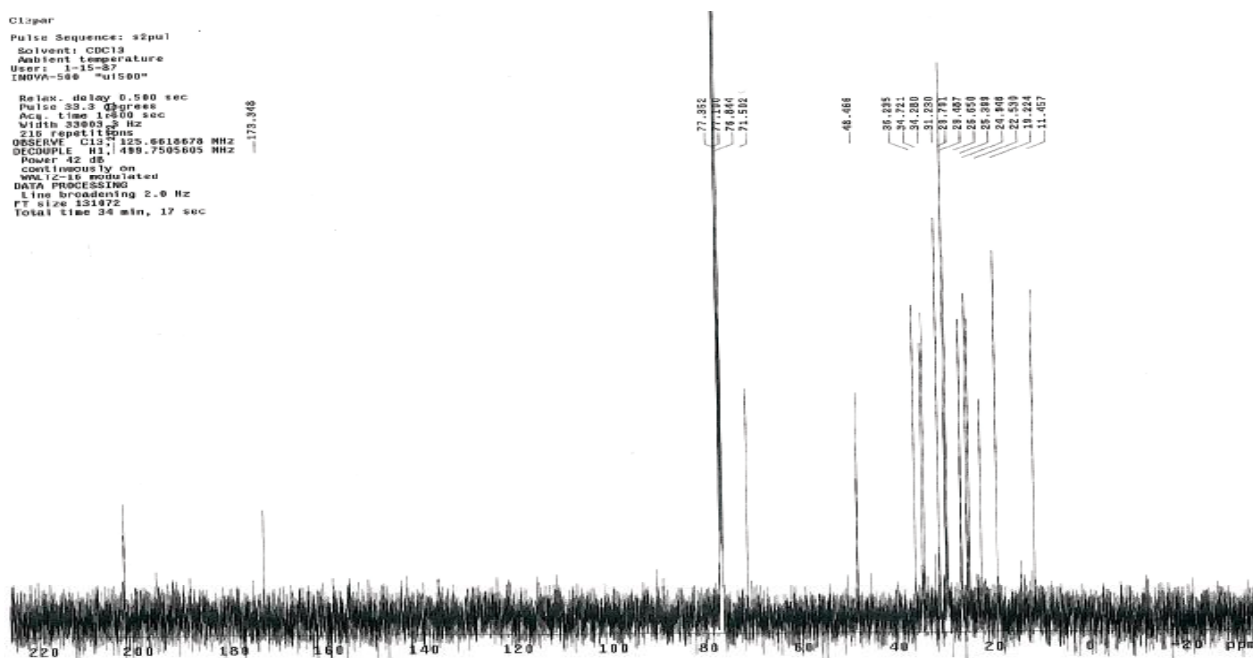

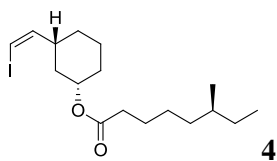

Pulse Sequence: s2pu1  
 Solvent: CDCl3  
 Ambient temperature  
 INOVA-500 "u1500"  
 Pulse 56.2 degrees  
 Acq. time 4.060 sec  
 Width 8000.0 Hz  
 10 repetitions  
 OBSERVE H1, 499.7485738 MHz  
 DATA PROCESSING  
 FT size 131072  
 Total time 2 hr, 51 min, 2 sec

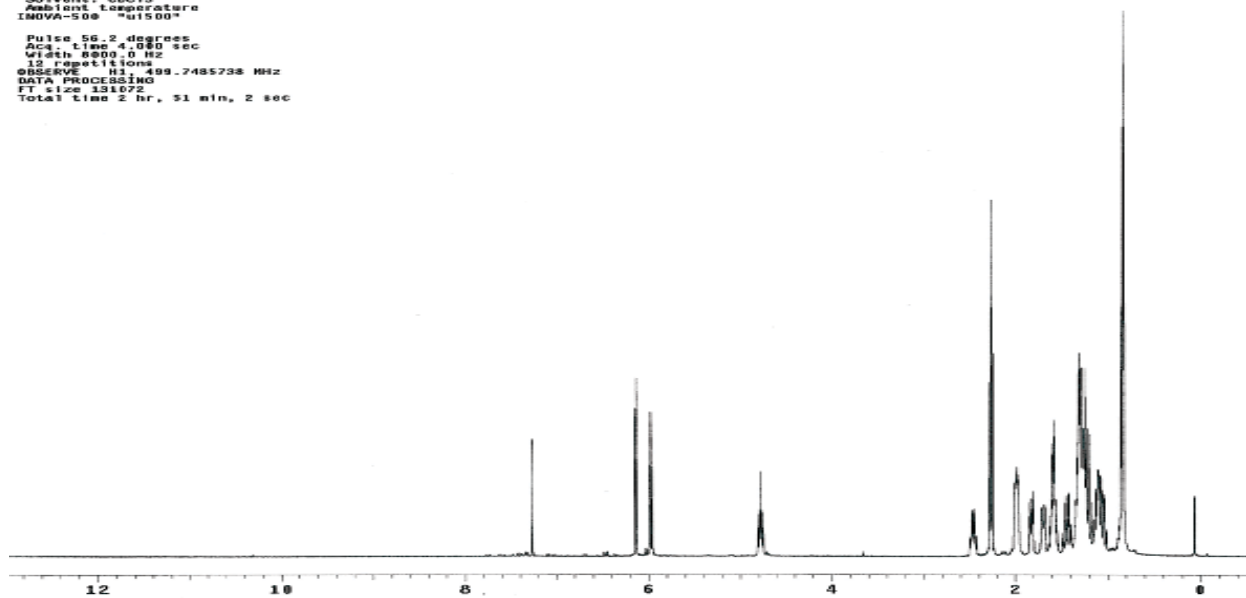

C13par

Pulse Sequence: s2pu1  
 Solvent: CDCl3  
 Ambient temperature  
 User: 1-15-97  
 INOVA-500 "u1500"  
 Relax. delay 0.500 sec  
 Pulse 33.3 degrees  
 Acq. time 1.500 sec  
 Width 33003.3 Hz  
 460 repetitions  
 OBSERVE C13, 125.6618678 MHz  
 DECOUPLE H1, 499.7505605 MHz  
 Power 42.65  
 Continuously on  
 MALTZ-16 modulated  
 DATA PROCESSING  
 Line broadening 2.0 Hz  
 FT size 131072  
 Total time 34 min, 17 sec

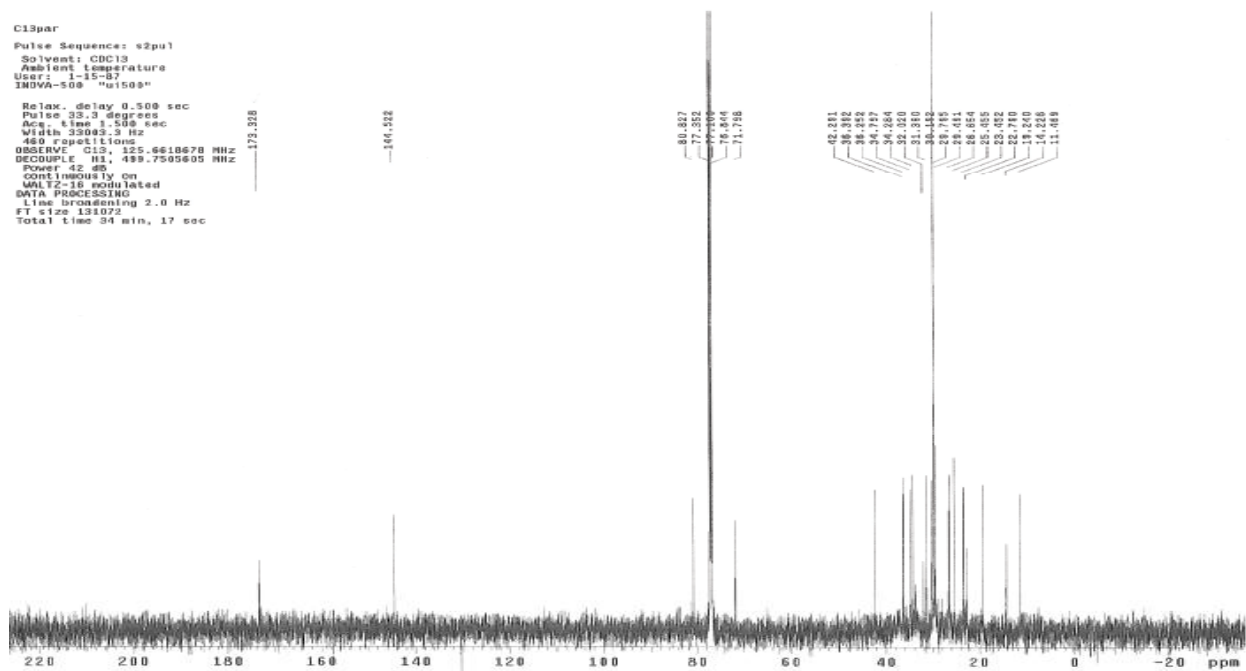

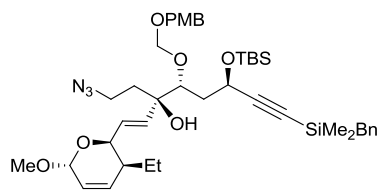

26

Pulse Sequence: s2pul  
 Solvent: CDCl<sub>3</sub>  
 Ambient Temperature  
 INOVA-500 "u1500"  
 Pulse 56.2 degrees  
 Acq. Time 4.080 sec  
 Width 3300.0 Hz  
 40 repetitions  
 OBSERVE H1, 499.7485721 MHz  
 DATA PROCESSING  
 FT size 131072  
 Total time 1 hr, 25 min, 31 sec

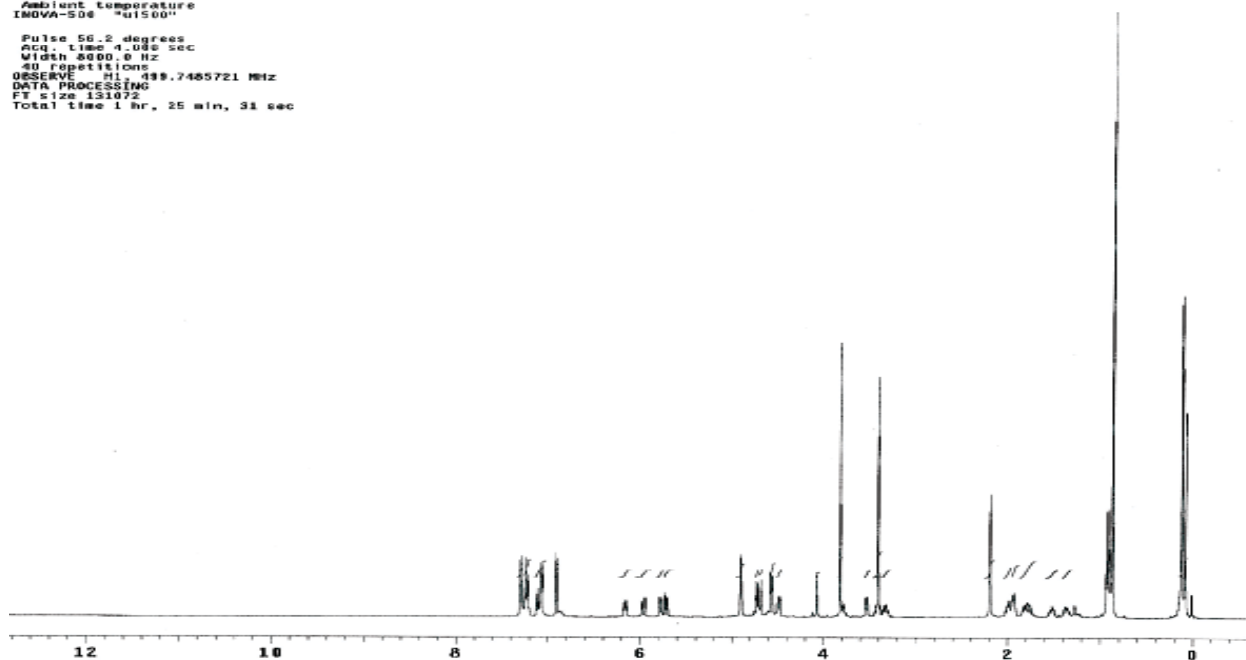

Pulse Sequence: s2pul  
 Solvent: CDCl<sub>3</sub>  
 Ambient Temperature  
 User1: 1-15-87  
 INOVA-500 "u1500"  
 Relax. delay 0.500 sec  
 Pulse 31.4 degrees  
 Acq. Time 1.500 sec  
 Width 3300.3 Hz  
 128 repetitions  
 OBSERVE H1, 125.6618839 MHz  
 DECOUPLE H1, 499.7505605 MHz  
 Power 42 dB  
 continuously on  
 MULTISF modulated  
 DATA PROCESSING  
 Line broadening 2.0 Hz  
 FT size 131872  
 Total time 30 min, 17 sec

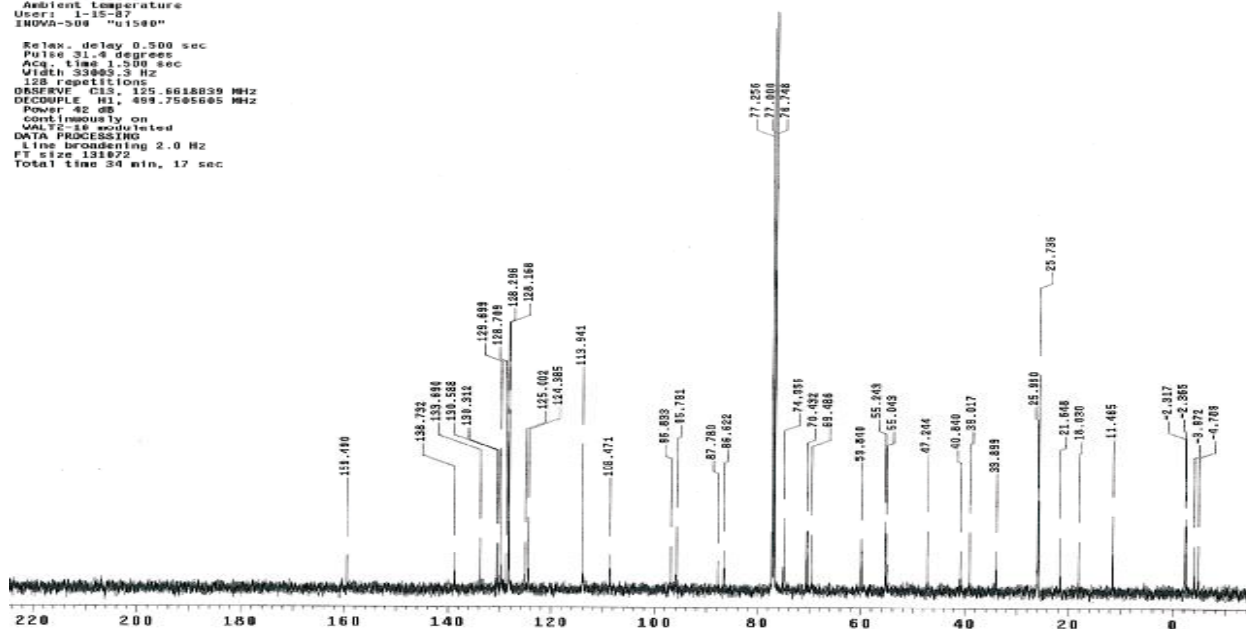







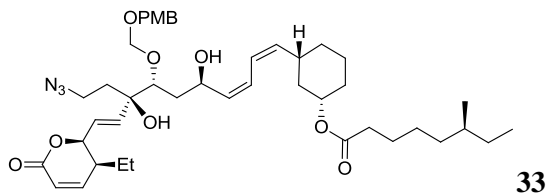

Pulse Sequence: s2pu1  
 Solvent: CDCl3  
 Ambient temperature  
 INOVA-500 "ui500"  
 Pulse 56.2 degrees  
 Acq. time 4.900 sec  
 Width 8000.0 Hz  
 64 repetitions  
 OBSERVE H1, 499.7485740 MHz  
 DATA PROCESSING  
 FT size 131072  
 Total time 2 hr, 51 min, 2 sec

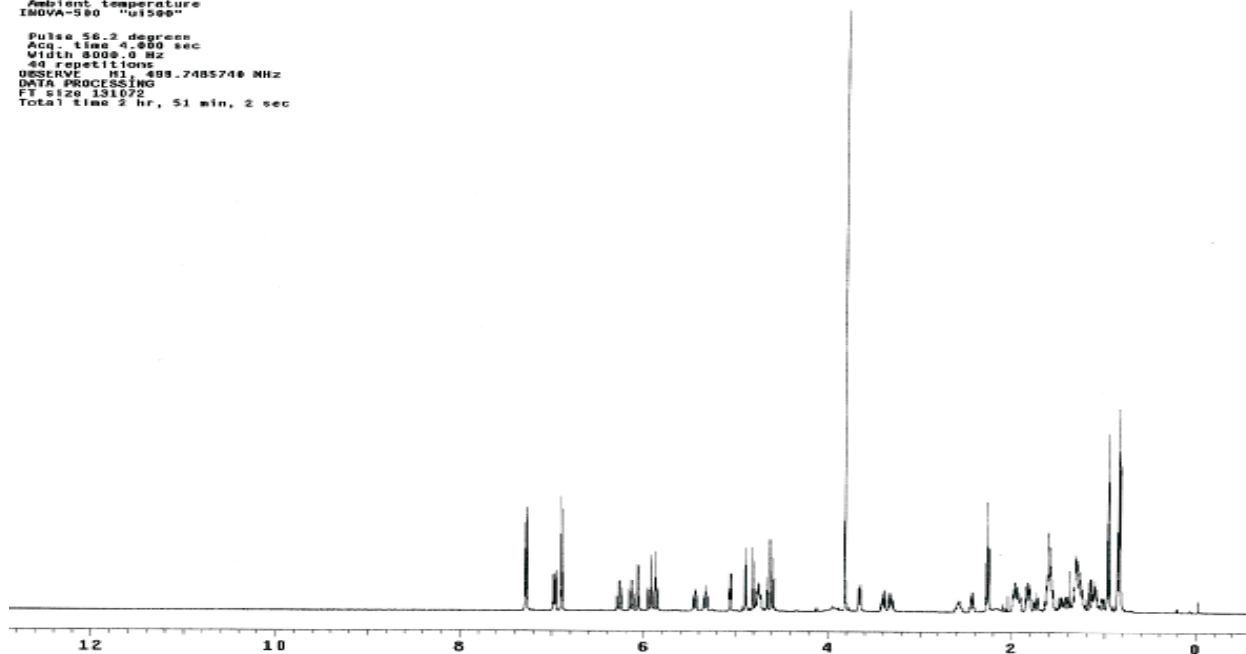

C13par  
 Pulse Sequence: s2pu1  
 Solvent: CDCl3  
 Ambient temperature  
 User: 1-15-87  
 INOVA-500 "ui500"  
 Relax. delay 0.500 sec  
 Pulse 31.9 degrees  
 Acq. time 1.500 sec  
 Width 35000.0 Hz  
 1304 repetitions  
 OBSERVE C13, 125.6618813 MHz  
 DECOUPLE H1, 99.7505605 MHz  
 Power 42 dB  
 Continues by on  
 WALTZ-16 sequenced  
 DATA PROCESSING  
 Line broadening 2.0 Hz  
 FT size 131072  
 Total time 1 hr, 8 min, 34 sec

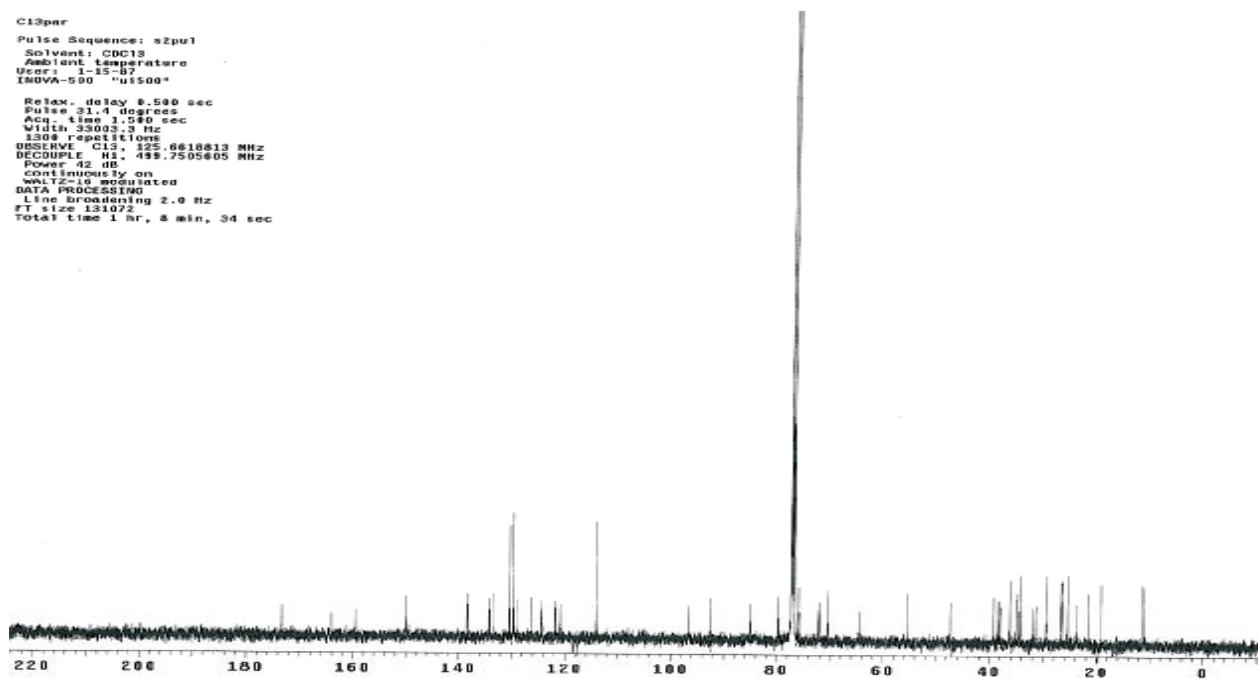

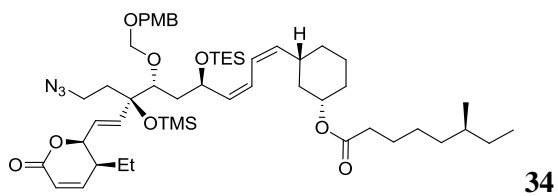

34

Pulse Sequence: s2pul  
 Solvent: CDCl<sub>3</sub>  
 Ambient temperature  
 INOVA-500 "u1500"  
 Pulse 50.2 degrees  
 Acq. time 4.089 sec  
 Width 8000.0 Hz  
 64 repetitions  
 OBSERVE H1, 499.7485748 MHz  
 DATA PROCESSING  
 FT size 131072  
 Total time 2 hr, 51 min, 2 sec

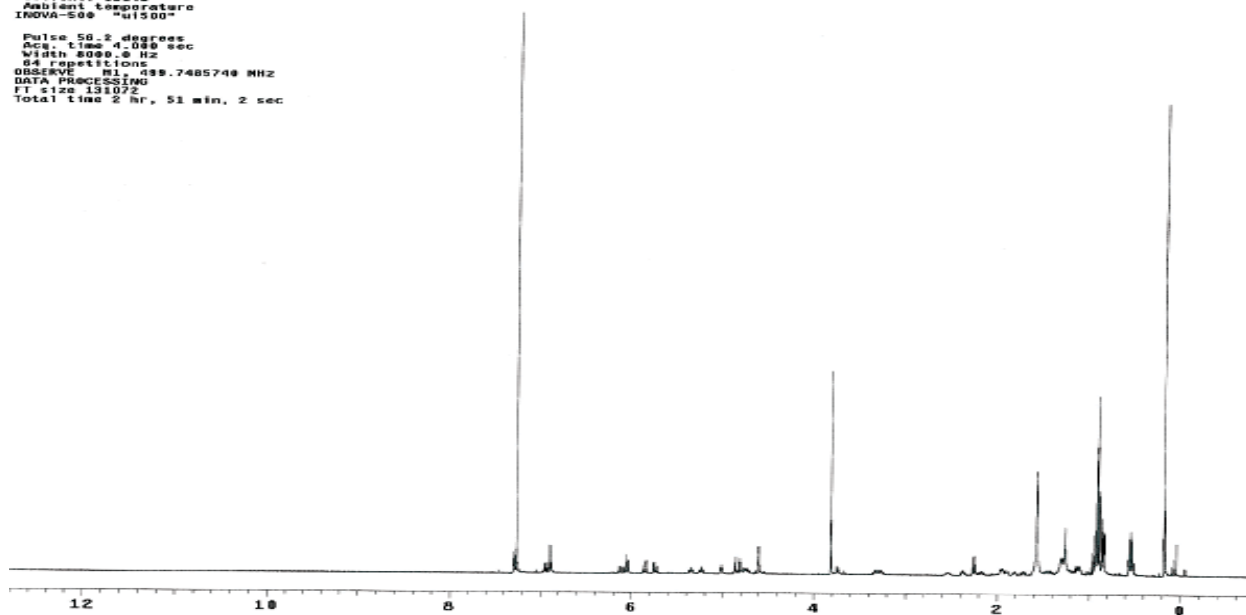

C13par  
 Pulse Sequence: s2pul  
 Solvent: CDCl<sub>3</sub>  
 Ambient temperature  
 User: 1-15-87  
 INOVA-500 "u1500"  
 Relax. delay 0.508 sec  
 Pulse 37.2 degrees  
 Acq. time 1.508 sec  
 Width 33003.3 Hz  
 15560 repetitions  
 OBSERVE C13, 125.6618455 MHz  
 DECUPLE H1, 499.7505605 MHz  
 Power 42 dB  
 Continuously on  
 MULTIF-IE modulated  
 DATA PROCESSING  
 Line broadening 2.0 Hz  
 FT size 131072  
 Total time 8 hr, 55 min, 43 sec

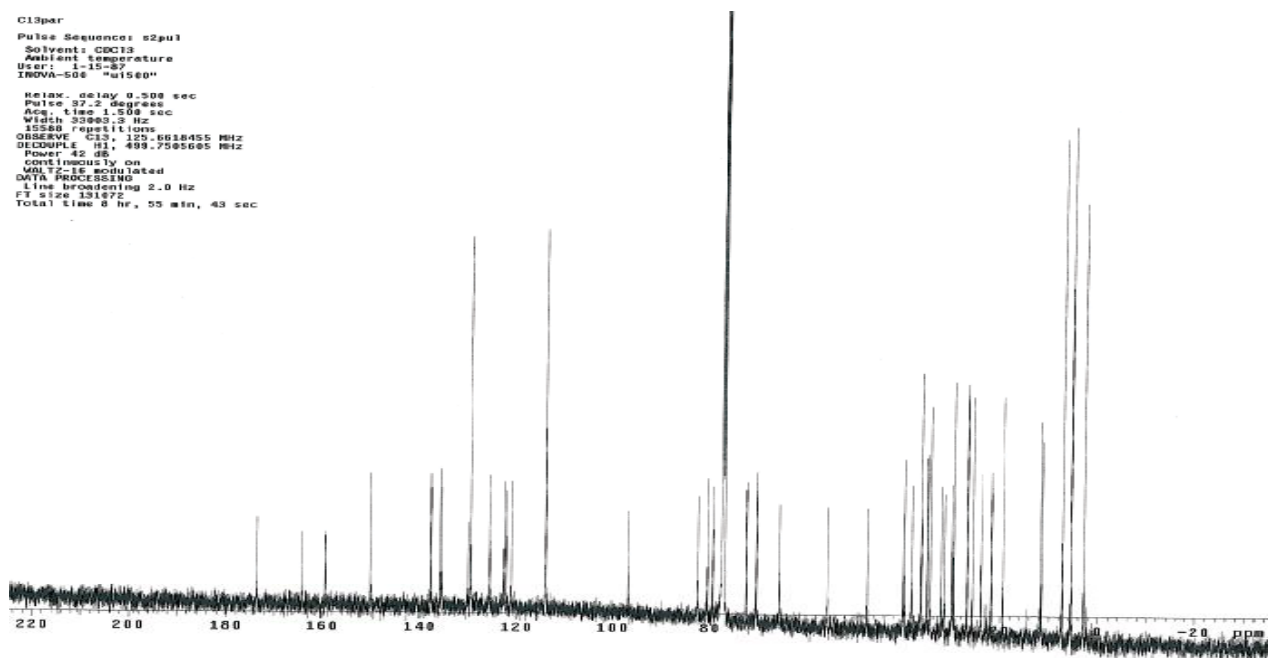

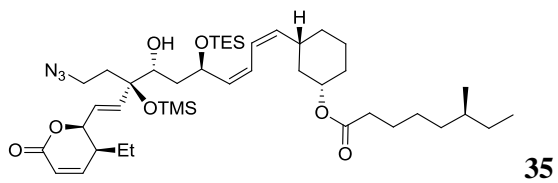

Pulse Sequence: s2pu1  
 Solvent: CDCl3  
 Ambient temperature  
 INOVA-500 "u1500"

Pulse 55.4 degrees  
 Acq. time 4.600 sec  
 Width 8000.0 Hz  
 64 repetitions  
 OBSERVE H1, 499.7485667 MHz  
 DATA PROCESSING  
 FT size 131072  
 Total time 1 hr, 25 min, 31 sec

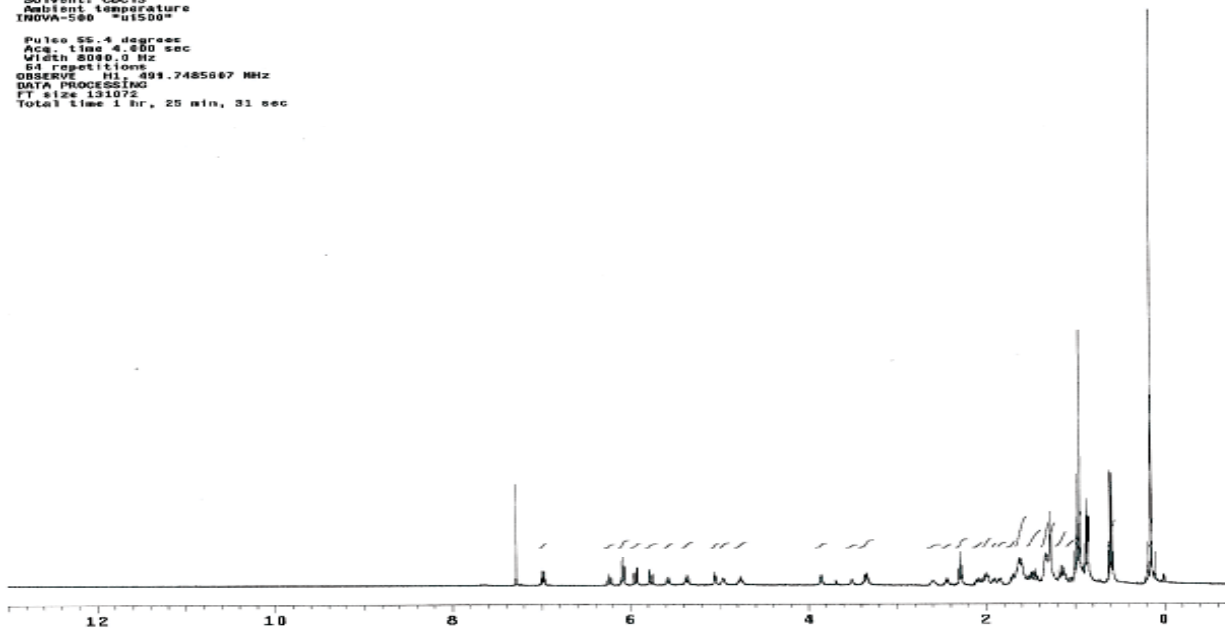

C13par  
 Pulse Sequence: s2pu1  
 Solvent: CDCl3  
 Ambient temperature  
 User: 3-15-87  
 INOVA-500 "u1500"

Relax. delay 0.300 sec  
 Pulse 37.2 degrees  
 Acq. time 1.300 sec  
 Width 33000.0 Hz  
 18224 repetitions  
 OBSERVE C13, 125.0618803 MHz  
 DECOUPLE H1, 499.7505665 MHz  
 Power 42 dB  
 Continuously on  
 WALTZ-16 modulated  
 DATA PROCESSING  
 Line broadening 2.0 Hz  
 FT size 131872  
 Total time 11 hr, 9 min, 38 sec

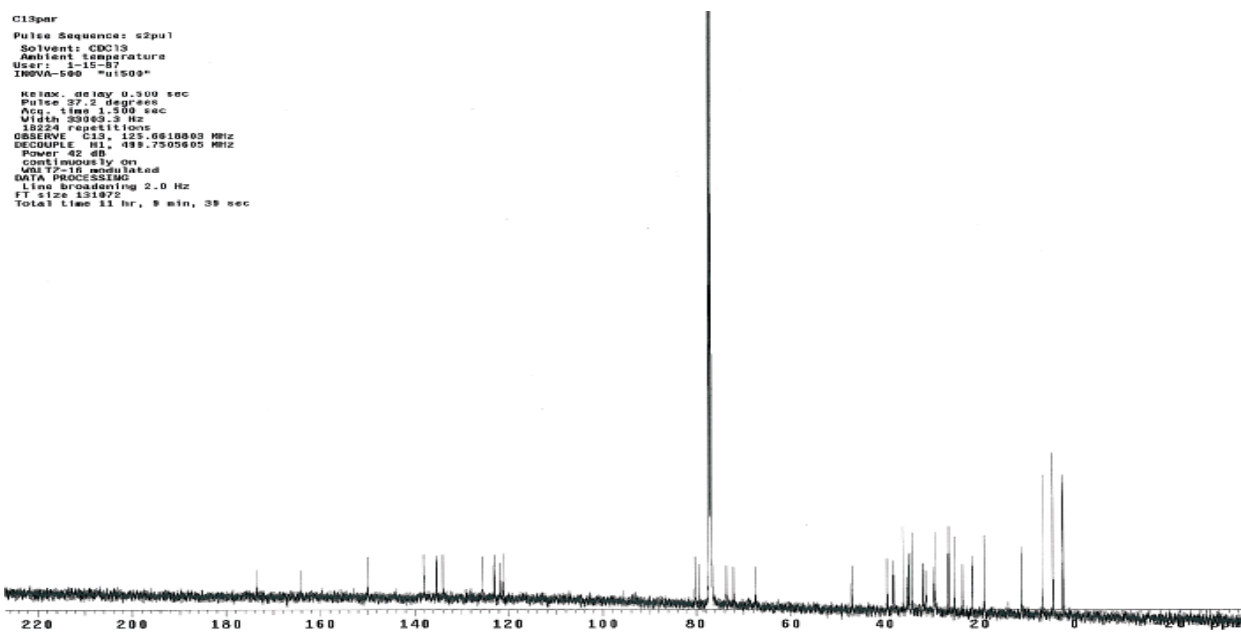



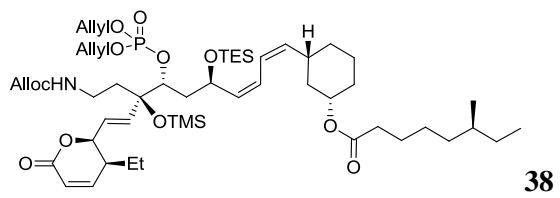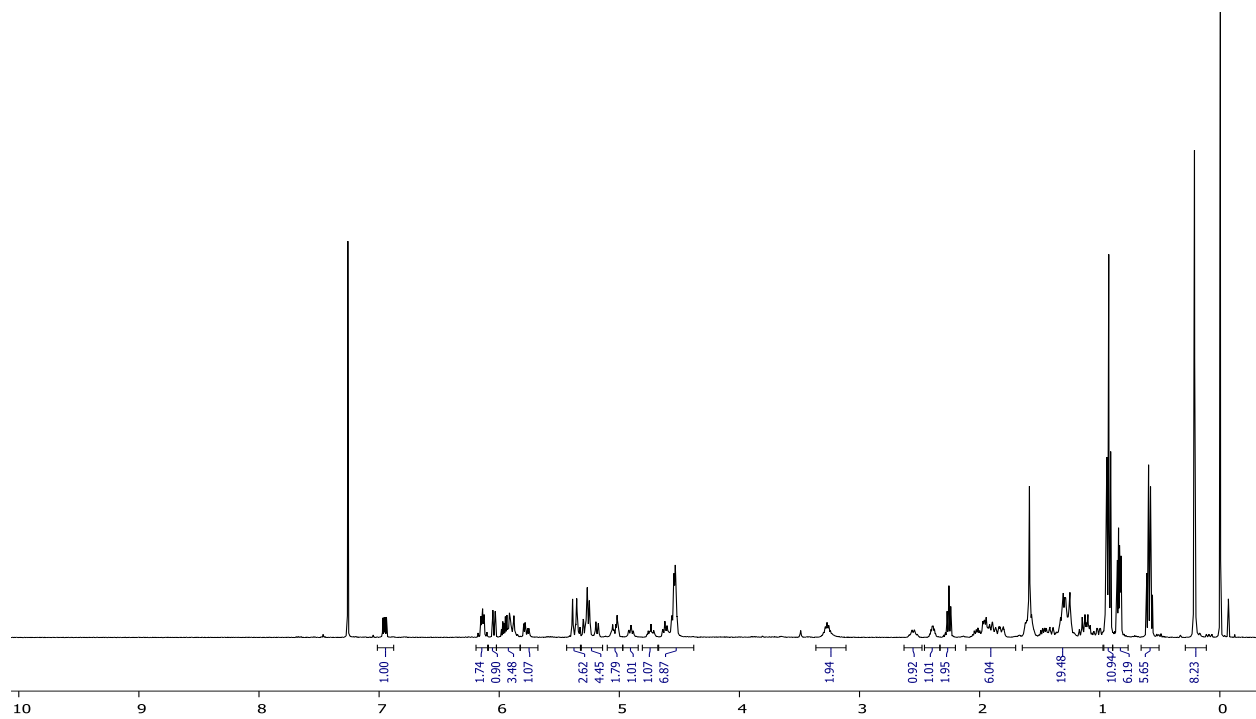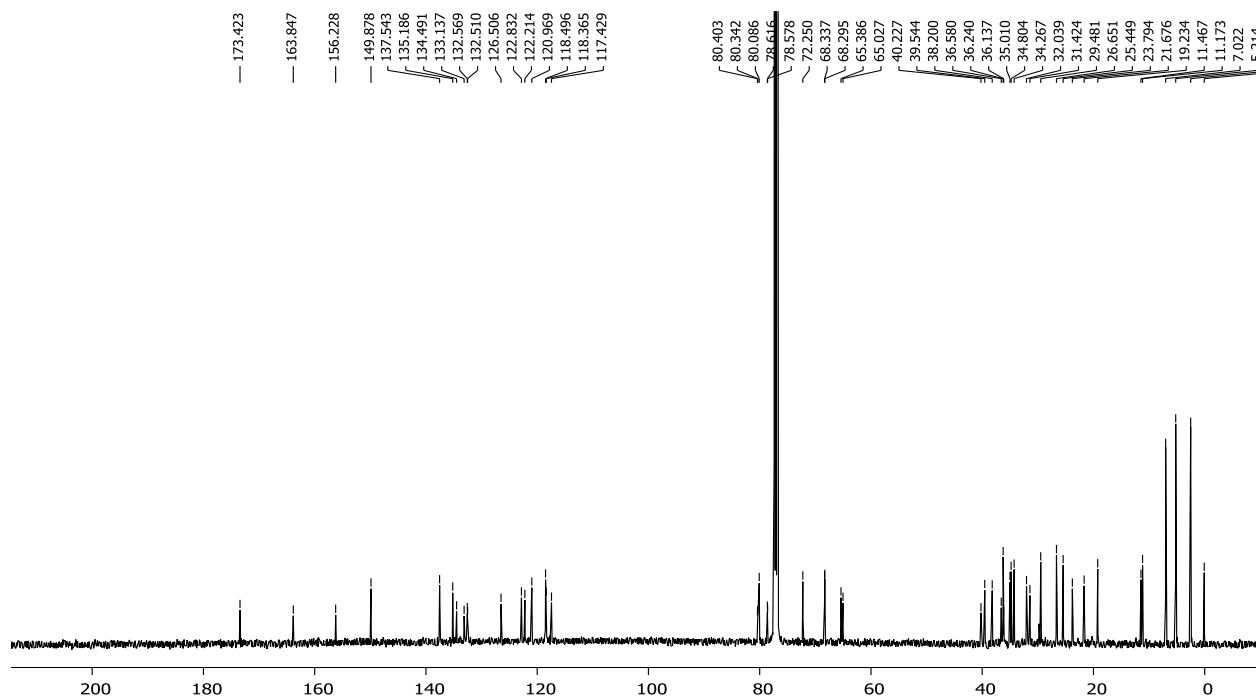

Authentic leustroducsin B  
(Fukuyama *et. al.*)

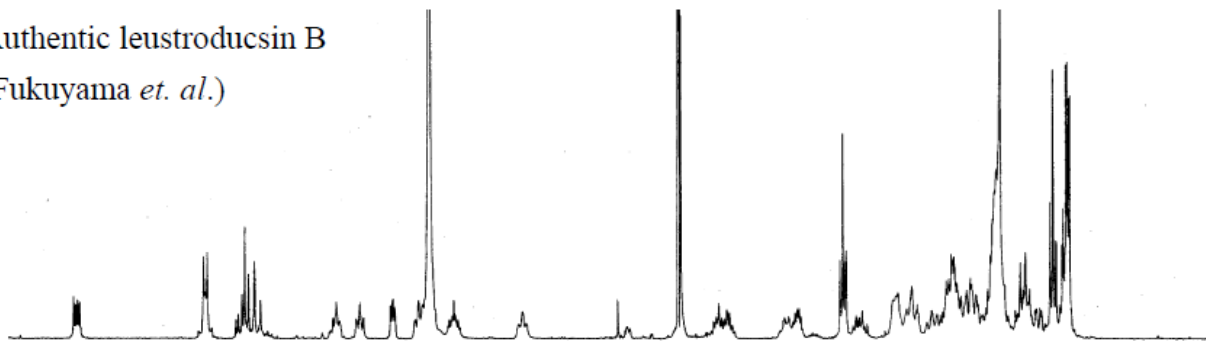

Synthetic leustroducsin B  
Trost – 2015  
 $^1\text{H}$ , 400 MHz

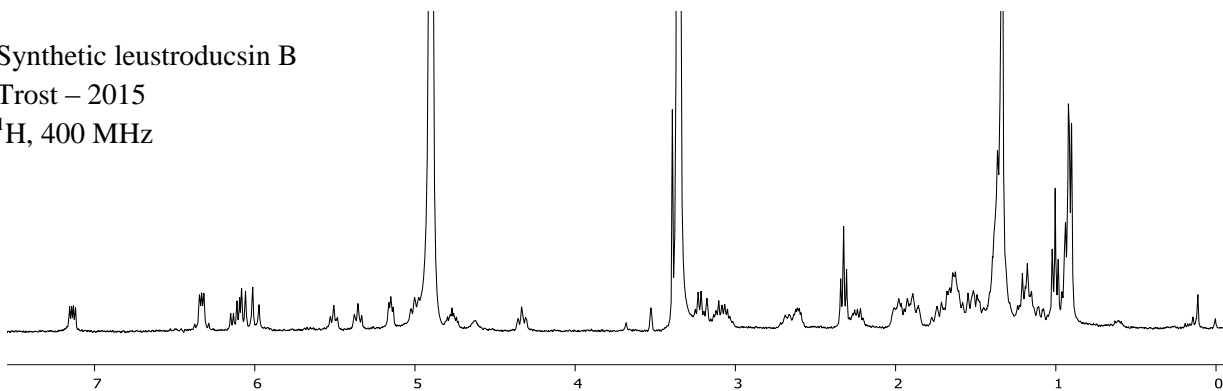

Synthetic leustroducsin B  
Trost – 2015  
 $^{13}\text{C}$ , 150 MHz

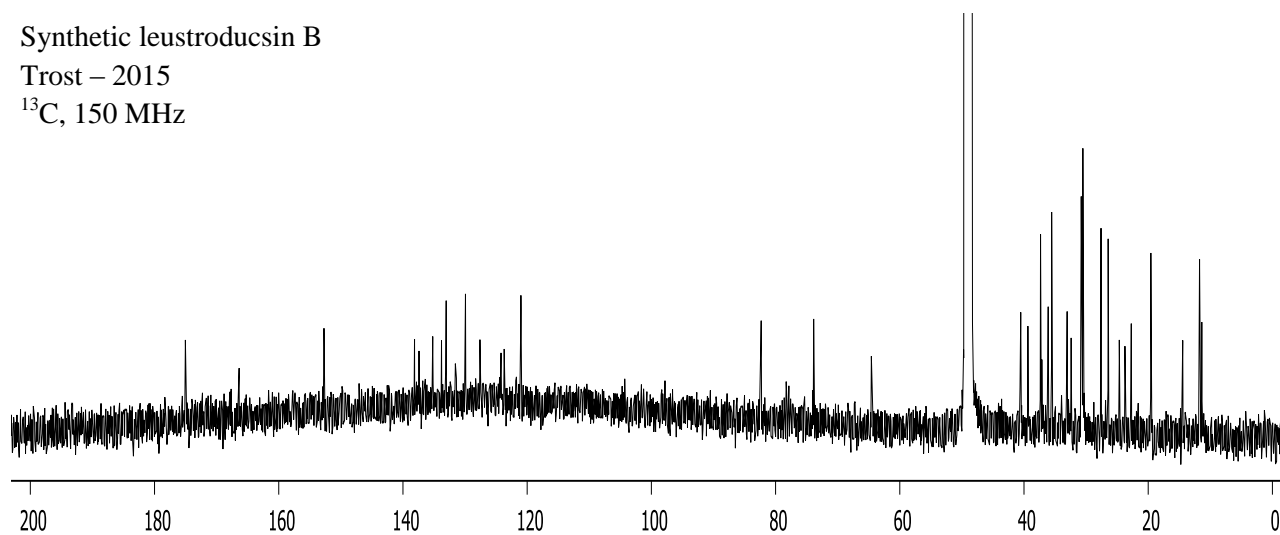

The picture of the  $^1\text{H}$  spectrum of natural leustroducsin B was taken from : Miyashita, K.; Tsunemi, T.; Hosokawa, T.; Ikejiri, M.; Imanishi, T. *J. Org. Chem.* **2008**, *73*, 5360-5370.

- 
- (1) Structure **11a** does not appear in the manuscript.
- (2) Trost, B. M.; Fettes, A.; Shireman, B. T. *J. Am. Chem. Soc.* **2004**, *126*, 2660-2661.
- (3) Ynone **15** was prepared following the procedure described in : Trost, B. M.; Frederiksen, M. U.; Papillon, J. P. N.; Harrington, P. E.; Shin, S.; Shireman, B. T. *J. Am. Chem. Soc.* **2005**, *127*, 3666-3667.
- (4) PMBOCH<sub>2</sub>Cl (**18**) was prepared following the procedure described in: Benneche, T.; Strande, P.; Undheim, K. *Synthesis* **1983**, 762-763.
- (5) Organ, M. G.; Bilokin, Y. V.; Bratovanov, S. *J. Org. Chem.* **2002**, *67*, 5176-5183.
- (6) Matsushashi, H.; Shimada, K. *Tetrahedron* **2002**, *58*, 5619-5626.
- (7) Lactone **20** was synthesized following a procedure described in: Trost, B. M.; Richardson, J.; Yong, K. *J. Am. Chem. Soc.* **2006**, *128*, 2540-2541.
- (8) Shimada, K.; Kaburagi, Y.; Fukuyama, T. *J. Am. Chem. Soc.* **2003**, *125*, 4048-4049.
- (9) **31** was prepared following the procedure described in: Myers, A. G.; Zheng, B.; Movassaghi, M. *J. Org. Chem.* **1997**, *62*, 7507-7507.
